# Supplementary material for: Effect of hyperbaric oxygen therapy on chronic neurocognitive deficits of post-traumatic brain injury patients: retrospective analysis
Source: PubMed Central journal article supplement — BMJ Open. 2018 Sep 28;8(9):e023387. doi: 10.1136/bmjopen-2018-023387 (PMC6169752; doi:10.1136/bmjopen-2018-023387), 2018-09-28
Supplement: bmjopen-2018-023387.draft_revisions.pdf [file bmjopen-2018-023387.draft_revisions.pdf]

# BMJ Open

BMJ Open is committed to open peer review. As part of this commitment we make the peer review history of every article we publish publicly available.

When an article is published we post the peer reviewers' comments and the authors' responses online. We also post the versions of the paper that were used during peer review. These are the versions that the peer review comments apply to.

The versions of the paper that follow are the versions that were submitted during the peer review process. They are not the versions of record or the final published versions. They should not be cited or distributed as the published version of this manuscript.

BMJ Open is an open access journal and the full, final, typeset and author-corrected version of record of the manuscript is available on our site with no access controls, subscription charges or pay-per-view fees (<http://bmjopen.bmj.com>).

If you have any questions on BMJ Open's open peer review process please email [info.bmjopen@bmj.com](mailto:info.bmjopen@bmj.com)

# BMJ Open

## Hyperbaric oxygen improves functioning of patients suffering from chronic neurocognitive deficits due to traumatic brain injury- correlations between cognitive functions and brain metabolic imaging

|                               |                                                                                                                                                                                                                                                                                                                                                                                                                                                                                                                                                                                          |
|-------------------------------|------------------------------------------------------------------------------------------------------------------------------------------------------------------------------------------------------------------------------------------------------------------------------------------------------------------------------------------------------------------------------------------------------------------------------------------------------------------------------------------------------------------------------------------------------------------------------------------|
| Journal:                      | <i>BMJ Open</i>                                                                                                                                                                                                                                                                                                                                                                                                                                                                                                                                                                          |
| Manuscript ID                 | bmjopen-2018-023387                                                                                                                                                                                                                                                                                                                                                                                                                                                                                                                                                                      |
| Article Type:                 | Research                                                                                                                                                                                                                                                                                                                                                                                                                                                                                                                                                                                 |
| Date Submitted by the Author: | 05-Apr-2018                                                                                                                                                                                                                                                                                                                                                                                                                                                                                                                                                                              |
| Complete List of Authors:     | Hadanny, Amir; Galilee Medical Center, Neurosurgery; Assaf Harofeh Medical Center, Sagol Center for Hyperbaric Medicine and Research<br>Abbott, Stefanie; Asaf Harofeh Medical Center, Sagol Center for Hyperbaric Medicine and Research<br>Suzin, Gil; Asaf Harfoeh Medical Center, Sagol Center for Hyperbaric Medicine and Research<br>Bechor, Yair; Asaf Harofeh Medical Center, Sagol Center for Hyperbaric Medicine and Research<br>Efrati, Shai; Assaf Harofeh Medical Center, Sagol Center for Hyperbaric Medicine and Research; Tel Aviv University, Sackler School of Medicine |
| Keywords:                     | tbi, hbot, traumatic brain injury, hyperbaric oxygen, cognitive                                                                                                                                                                                                                                                                                                                                                                                                                                                                                                                          |
|                               |                                                                                                                                                                                                                                                                                                                                                                                                                                                                                                                                                                                          |

SCHOLARONE™  
Manuscripts

View Only

1  
2  
3 **Hyperbaric oxygen improves functioning of patients suffering from chronic** 1  
4 **neurocognitive delicts due to traumatic brain injury- correlations between** 2  
5 **cognitive functions and brain metabolic imaging** 3  
6  
7  
8

9 Amir Hadanny MD<sup>1,2,3,5</sup>, Stefanie Abbott BA<sup>2</sup>, Gil Suzin MA<sup>2</sup>, Yair Bechor BA<sup>2</sup>, 4  
10  
11 Shai Efrati MD<sup>2,4,5,6</sup> 5  
12

13  
14 <sup>1</sup>Neurosurgery department, Galilee Medical Center, Naharyia, Israel 6  
15

16  
17 <sup>2</sup>Sagol Center for Hyperbaric Medicine and Research, Assaf Harofeh Medical Center, 7  
18 Zerifin, Israel 8  
19  
20

21  
22 <sup>3</sup>Galilee Faculty of Medicine, Bar Ilan University, Israel 9  
23

24  
25 <sup>4</sup>Research and Development Unit, Assaf Harofeh Medical Center, 70300 Zerifin, 10  
26 Israel. 11  
27  
28

29  
30 <sup>5</sup>Sackler School of Medicine, Tel-Aviv University, 69978 Tel-Aviv, Israel 12  
31

32  
33 <sup>6</sup>Sagol School of Neuroscience, Tel-Aviv University, 69978 Tel-Aviv, Israel 13  
34

35  
36  
37  
38 *Corresponding author:* 15

39  
40 *Dr. Amir Hadanny,* 16

41  
42 Sagol Center for Hyperbaric Medicine and Research, 17

43  
44 Assaf Harofeh Medical Center , Zerifin, Israel 18

45  
46 T:972-8-9779395 F: 972-8-9542238 19

47  
48 E-mail: [Amir.had@gmail.com](mailto:Amir.had@gmail.com) 20  
49

50  
51 21

52  
53  
54 22

|    |                                                                                                |    |
|----|------------------------------------------------------------------------------------------------|----|
| 1  |                                                                                                |    |
| 2  |                                                                                                |    |
| 3  | <b><i>Author Disclosure Statement</i></b>                                                      | 23 |
| 4  |                                                                                                |    |
| 5  |                                                                                                |    |
| 6  | No competing financial interests exist.                                                        | 24 |
| 7  |                                                                                                |    |
| 8  |                                                                                                |    |
| 9  | No funding received for this work.                                                             | 25 |
| 10 |                                                                                                |    |
| 11 |                                                                                                |    |
| 12 | <b><i>Contributorship statement</i></b>                                                        | 26 |
| 13 |                                                                                                |    |
| 14 | AH: concept, data collection, data analysis, manuscript draft, manuscript review               | 27 |
| 15 |                                                                                                |    |
| 16 |                                                                                                |    |
| 17 | SA: data collection, data analysis                                                             | 28 |
| 18 |                                                                                                |    |
| 19 |                                                                                                |    |
| 20 | GS: data collection, manuscript review                                                         | 29 |
| 21 |                                                                                                |    |
| 22 |                                                                                                |    |
| 23 | YB: data collection, manuscript review                                                         | 30 |
| 24 |                                                                                                |    |
| 25 |                                                                                                |    |
| 26 | SE: concept, data analysis, manuscript draft, manuscript review                                | 31 |
| 27 |                                                                                                |    |
| 28 |                                                                                                |    |
| 29 | <b><i>Data sharing statement</i></b>                                                           | 32 |
| 30 |                                                                                                |    |
| 31 |                                                                                                |    |
| 32 | Extra data is available by emailing <a href="mailto:amir.had@gmail.com">amir.had@gmail.com</a> | 33 |
| 33 |                                                                                                |    |
| 34 |                                                                                                |    |
| 35 |                                                                                                | 34 |
| 36 |                                                                                                |    |
| 37 |                                                                                                |    |
| 38 | Running title: HBOT improves cognitive function in TBI                                         | 35 |
| 39 |                                                                                                |    |
| 40 |                                                                                                |    |
| 41 | Number of references: 40                                                                       | 36 |
| 42 |                                                                                                |    |
| 43 | Word count: 3331                                                                               | 37 |
| 44 |                                                                                                |    |
| 45 | Tables: 3                                                                                      | 38 |
| 46 |                                                                                                |    |
| 47 | Figures: 6                                                                                     | 39 |
| 48 |                                                                                                |    |
| 49 | No conflict of interests exist.                                                                | 40 |
| 50 |                                                                                                |    |
| 51 |                                                                                                |    |
| 52 |                                                                                                | 41 |
| 53 |                                                                                                |    |
| 54 |                                                                                                |    |
| 55 |                                                                                                | 42 |
| 56 |                                                                                                |    |
| 57 |                                                                                                |    |
| 58 |                                                                                                |    |
| 59 |                                                                                                |    |
| 60 |                                                                                                |    |

|    |                                                                                       |    |
|----|---------------------------------------------------------------------------------------|----|
| 1  |                                                                                       |    |
| 2  |                                                                                       |    |
| 3  | <b>Abstract</b>                                                                       | 43 |
| 4  |                                                                                       |    |
| 5  | <i>Objectives</i>                                                                     | 44 |
| 6  |                                                                                       |    |
| 7  | The aim of the study is to evaluate the effect of HBOT in participants suffering from | 45 |
| 8  | chronic neurological deficits of all severities due to TBI in the largest cohort      | 46 |
| 9  | evaluated so far with objective cognitive function and metabolic brain imaging.       | 47 |
| 10 |                                                                                       |    |
| 11 |                                                                                       |    |
| 12 |                                                                                       |    |
| 13 | <i>Methods</i>                                                                        | 48 |
| 14 |                                                                                       |    |
| 15 | A retrospective analysis was conducted of 154 patients suffering from chronic         | 49 |
| 16 | neurocognitive damage due to TBI, and had pre- and post-HBOT treatment                | 50 |
| 17 | computerized cognitive evaluations.                                                   | 51 |
| 18 |                                                                                       |    |
| 19 |                                                                                       |    |
| 20 |                                                                                       |    |
| 21 |                                                                                       |    |
| 22 | <i>Results</i>                                                                        | 52 |
| 23 |                                                                                       |    |
| 24 | The average age was 42.7±14.6 years and 58.4% were males. All patients had            | 53 |
| 25 | documented traumatic brain injury 0.3-33 years (mean 4.6±5.8, median 2.75 years)      | 54 |
| 26 | prior to HBOT. HBOT induced significant improvement in all of the cognitive           | 55 |
| 27 | domains where the mean change in global cognitive scores was 4.6±8.5 (p<0.00001).     | 56 |
| 28 |                                                                                       |    |
| 29 | The most prominent improvement was in memory index and attention with mean            | 57 |
| 30 | changes of 8.1±16.9 (p<0.00001) and 6.8±16.5 (p<0.0001), respectively. The most       | 58 |
| 31 | striking changes in brain SPECTs were in the anterior cingulate and the post-central  | 59 |
| 32 | cortex, the prefrontal areas and temporal areas.                                      | 60 |
| 33 |                                                                                       |    |
| 34 |                                                                                       |    |
| 35 |                                                                                       |    |
| 36 |                                                                                       |    |
| 37 |                                                                                       |    |
| 38 |                                                                                       |    |
| 39 |                                                                                       |    |
| 40 |                                                                                       |    |
| 41 |                                                                                       |    |
| 42 | <i>Conclusions</i>                                                                    | 61 |
| 43 |                                                                                       |    |
| 44 |                                                                                       |    |
| 45 | HBOT induced significant cognitive improvements in patients suffering from chronic    | 62 |
| 46 | deficits in TBI of all severities. The clinical improvement was well correlated with  | 63 |
| 47 | increased activity in the relevant brain areas.                                       | 64 |
| 48 |                                                                                       |    |
| 49 |                                                                                       |    |
| 50 |                                                                                       |    |
| 51 |                                                                                       |    |
| 52 |                                                                                       |    |
| 53 |                                                                                       | 65 |
| 54 |                                                                                       |    |
| 55 |                                                                                       |    |
| 56 |                                                                                       |    |
| 57 |                                                                                       |    |
| 58 |                                                                                       |    |
| 59 |                                                                                       |    |
| 60 |                                                                                       |    |

1  
2  
3 Keywords: hyperbaric oxygen, HBOT, post concussion, PCS, TBI, traumatic brain 66  
4  
5 injury 67  
6

7 **Article Summary** 68  
8

- 9  
10 • This is a retrospective analysis of the largest cohort of patients suffering from 69  
11 TBI related chronic neurocognitive damage, treated by HBOT. Patients 70  
12 suffering any degree of TBI injury (mild to severe) were included and 71  
13 evaluated with objective computerized cognitive tests. 72  
14  
15 • HBOT induced significant cognitive improvements in patients who suffer 73  
16 from chronic neurocognitive deficits due to mild, moderate and severe TBI. 74  
17  
18 • The improvement in memory correlated with activation of the perirhinal 75  
19 cortex, improvement of executive functions correlated with activation of the 76  
20 inferior frontal gyrus and improvement in attention correlated with activation 77  
21 of the anterior cingulate gyrus. 78  
22  
23  
24  
25  
26  
27  
28  
29  
30  
31

32 **Strengths and limitations of the study** 79  
33

- 34  
35 • The major limitation relates to its retrospective methodology. This limitation 80  
36 should be considered even though this large cohort of patients was treated at 81  
37 late chronic stages. The findings presented here are in agreement with the 82  
38 findings from previous prospective controlled trials. 83  
39  
40  
41 • In regards to strengths, objective cognitive assessments using computerized 84  
42 tests were performed to each patient both pre- and post-treatment. Objective 85  
43 measures are significantly superior to PCS questionnaires which are 86  
44 inaccurate, variable and contain various confounders. Second, most of the 87  
45 patients in the study underwent an objective ancillary brain SPECT to confirm 88  
46 PCS diagnosis prior to HBOT. This practice is crucial when considering the 89  
47  
48  
49  
50  
51  
52  
53  
54  
55  
56  
57  
58  
59  
60

1  
2  
3  
4  
5  
6  
7  
8  
9  
10  
11  
12  
13  
14  
15  
16  
17  
18  
19  
20  
21  
22  
23  
24  
25  
26  
27  
28  
29  
30  
31  
32  
33  
34  
35  
36  
37  
38  
39  
40  
41  
42  
43  
44  
45  
46  
47  
48  
49  
50  
51  
52  
53  
54  
55  
56  
57  
58  
59  
60

differential diagnosis following TBI (PTSD, depression, etc.). Third, the study 90  
cohort included a civilian population that does not have any potential 91  
secondary gain (such as financial compensation by reporting sick). 92  
93

For peer review only

1  
2  
3 **Introduction** 94  
4

5 Traumatic brain injury (TBI) is one of the leading causes of death and disability in the 95  
6 general population.(1) Following TBI, patients may experience a set of symptoms 96  
7 known as post-concussion syndrome (PCS). PCS symptoms include headaches, 97  
8 dizziness, neuropsychiatric symptoms, and cognitive impairments.(2) PCS can 98  
9 continue for weeks or months, and up to 25% of all patients experience prolonged 99  
10 PCS (PPCS) in which the symptoms last for over six months.(3) 100

11  
12  
13  
14  
15  
16  
17  
18  
19 In the past years there is growing clinical evidence regarding the effect of hyperbaric 101  
20 oxygen therapy (HBOT) on PCS.(4, 5) Unfortunately, the clinical data gathered from 102  
21 those studies can be conflicting due to several inherent procedural issues such as the 103  
22 use of non-objective end points, the lack of appropriate brain imaging as part of the 104  
23 inclusion criteria, the inappropriate placebo of a hyperbaric environment and the 105  
24 inclusion of patients that may gain secondary benefits from reporting sick.(4, 5) The 106  
25 current study represents the largest cohort evaluated till now of civilian participants 107  
26 suffering from PCS treated by HBOT who had objective metabolic brain imaging and 108  
27 a computerized neurocognitive test battery before and after the treatment. 109

30  
31  
32  
33  
34  
35  
36  
37  
38  
39  
40 *Pathophysiology of PCS and HBOT* 110

41 The most common pathological mechanism in TBI is diffuse shearing of axonal 111  
42 pathways and small blood vessels, also known as diffuse axonal injury.(6) The 112  
43 secondary pathological mechanisms of TBI include ischemia, mild edema, and other 113  
44 biochemical and inflammatory processes culminating in impaired regenerative and/or 114  
45 healing processes resulting from increasing tissue hypoxia.(7) Due to the diffuse 115  
46 nature of injury, affecting multiple brain areas,(8, 9) cognitive impairments are 116  
47 usually the predominant symptoms. 117



1  
2  
3 Global brain hypoperfusion, and its related tissue ischemia, detected in patients 118  
4 suffering from TBI, serves as a rate-limiting factor for any regenerative process.(10- 119  
5 12) By increasing the oxygen level in blood and body tissues, HBOT can augment the 120  
6 repair mechanisms.(13) Various models have strongly suggested that HBOT can 121  
7 induce angiogenesis, improve brain plasticity, enhance neurogenesis and 122  
8 synaptogenesis and foster functional recovery.(14, 15) 123

9  
10  
11  
12  
13  
14  
15  
16 *Conflicting clinical HBOT data and objective measurements in PCS* 124  
17

18  
19 Some of the previous studies which evaluated the effect of HBOT on chronic 125  
20 neurological and cognitive impairments due to TBI, mainly used self-assessment 126  
21 questionnaires as their primary endpoints.(16-18) Such endpoints have several 127  
22 inherent disadvantages. First, they lack an objective evaluation that is not biased by 128  
23 the patients' perspectives. Second, self-administrated questionnaires are exposed to 129  
24 various confounding variables such as litigation and compensation (19). Unlike the 130  
25 questionnaires, standardized cognitive tests with high test-retest reliability can and 131  
26 should be used as objective evaluations of neurocognitive impairments.(20) In 132  
27 addition, novel brain imaging techniques such as single photon emission computed 133  
28 tomography (SPECT) and perfusion sequences in magnetic resonance imaging (MRI), 134  
29 which evaluate cerebral blood flow and brain metabolism, can shed new light in PCS 135  
30 diagnosis and in evaluating therapeutic interventions.(20) In clinical studies which 136  
31 utilized objective cognitive assessments, HBOT induced significant improvements in 137  
32 patients suffering from PCS due to mild TBI. (13, 15, 21) However, to the best of our 138  
33 knowledge, the objective effect of HBOT on chronic neurocognitive impairments 139  
34 stemming from moderate or severe TBI (in addition to mild) has not been 140  
35 investigated. 141  
36  
37  
38  
39  
40  
41  
42  
43  
44  
45  
46  
47  
48  
49  
50  
51  
52  
53  
54  
55  
56  
57  
58  
59  
60

1  
2  
3 In addition to objective evaluations, there are inherent ethical and logistic difficulties 142  
4 in handling the sham-control in HBOT trials.(4, 5, 20, 22) HBOT includes two active 143  
5 ingredients: pressure and oxygen. Pressure is needed to increase plasma oxygen, but 144  
6 the pressure change alone may also have significant cellular effects.(5) Additionally, 145  
7 the greatest effect of pressure is in human tissues that are under tight autoregulation 146  
8 pressure control, such as the brain, where the intracranial pressure is normally 0.0092- 147  
9 0.0197atm.(23, 24) To generate a pressure sensation, the chamber pressure must be 148  
10 1.2ATA or higher. However, such a significant change in environmental pressure and 149  
11 subsequent tissue oxygenation (with an increase of tissue oxygenation by at least 150  
12 50%) cannot be referred as a sham-control but rather as a lower dose of the active 151  
13 ingredient.(4, 20) 152

14  
15  
16  
17  
18 Any increase in pressure, even with reduced oxygen percentage, cannot serve as a true 153  
19 placebo, but rather as a low dosage of the active ingredient, further supporting the 154  
20 need for objective data gathered from large cohorts of patients suffering from PCS 155  
21 and treated by HBOT. 156

22  
23  
24  
25  
26  
27  
28  
29  
30  
31  
32  
33  
34  
35  
36  
37  
38  
39  
40  
41  
42  
43  
44  
45  
46  
47  
48  
49  
50  
51  
52  
53  
54  
55  
56  
57  
58  
59  
60  
The aim of the current study was to evaluate the objective effects of HBOT on TBI 157  
patients suffering from chronic neurological deficits stemming from mild, moderate, 158  
and severe TBI in the largest cohort evaluated till now. Since all the patients had 159  
metabolic brain imaging and a computerized neurocognitive test battery before and 160  
after HBOT, correlations between specific cognitive indexes and their related brain 161  
region activity were also evaluated. 162

1  
2  
3  
4  
5  
6  
7  
8  
9  
10  
11  
12  
13  
14  
15  
16  
17  
18  
19  
20  
21  
22  
23  
24  
25  
26  
27  
28  
29  
30  
31  
32  
33  
34  
35  
36  
37  
38  
39  
40  
41  
42  
43  
44  
45  
46  
47  
48  
49  
50  
51  
52  
53  
54  
55  
56  
57  
58  
59  
60

|                                                                                                                                                                                                                                                                                                                                                                                                                                                                                                                                                                                                                                                                               |                                                             |
|-------------------------------------------------------------------------------------------------------------------------------------------------------------------------------------------------------------------------------------------------------------------------------------------------------------------------------------------------------------------------------------------------------------------------------------------------------------------------------------------------------------------------------------------------------------------------------------------------------------------------------------------------------------------------------|-------------------------------------------------------------|
| <b><i>Materials and Methods</i></b>                                                                                                                                                                                                                                                                                                                                                                                                                                                                                                                                                                                                                                           | 164                                                         |
| <i>Participants</i>                                                                                                                                                                                                                                                                                                                                                                                                                                                                                                                                                                                                                                                           | 165                                                         |
| A retrospective analysis was conducted on patients suffering from TBI related chronic neurocognitive damage, treated by HBOT between January 2008 and January 2017 at the Sagol Center for Hyperbaric Medicine and Research at the Assaf Harofeh Medical Center, Israel. Patients were included if they had pre- and post-HBOT computerized cognitive evaluations. Patients with a history of potential additional brain insults such as spontaneous subarachnoid hemorrhage, anoxic brain injury or history of prior cognitive impairment, were excluded (Figure-1).                                                                                                         | 166<br>167<br>168<br>169<br>170<br>171<br>172               |
| The study was approved by the Asaf Harofeh Medical Center's Institutional Review Board.                                                                                                                                                                                                                                                                                                                                                                                                                                                                                                                                                                                       | 173<br>174                                                  |
| <i>Patients and public involvement</i>                                                                                                                                                                                                                                                                                                                                                                                                                                                                                                                                                                                                                                        | 175                                                         |
| Patients and public weren't involved in the study due to its retrospective nature.                                                                                                                                                                                                                                                                                                                                                                                                                                                                                                                                                                                            | 176                                                         |
| <i>TBI severity</i>                                                                                                                                                                                                                                                                                                                                                                                                                                                                                                                                                                                                                                                           | 177                                                         |
| TBI severities were rated according to the TBI admission documents. Mild TBI was defined as loss of consciousness (LOC) duration of 0–30 minutes, post traumatic amnesia (PTA) duration of less than a day and a Glasgow coma scale (GCS) grade of 13–15. (25) Moderate TBI was defined as LOC duration of more than 30 minutes up to 24 hours, PTA duration of 1-7 days and GCS grade of 9-12. Severe TBI was defined as LOC duration more than 24 hours, PTA duration more than seven days and GCS less than 9. In addition if there was imaging evidence of an injury such as a hematoma, contusion or hemorrhage, then the TBI was classified as moderate to severe. (25) | 178<br>179<br>180<br>181<br>182<br>183<br>184<br>185<br>186 |
| <i>Hyperbaric oxygen treatment</i>                                                                                                                                                                                                                                                                                                                                                                                                                                                                                                                                                                                                                                            | 187                                                         |

1  
2  
3 Patients were treated with 40-70 daily hyperbaric sessions, 5 days a week. Each 188  
4 session consisted of 60 minutes of exposure to 100% oxygen at 1.5-2 ATA. 189  
5

6  
7 *Cognitive assessment* 190  
8

9  
10 The patients' cognitive functions were assessed by NeuroTrax computerized cognitive 191  
11 tests (NeuroTrax Corp., TX).(26) The NeuroTrax tests evaluate various aspects of 192  
12 brain functions and include verbal memory (immediate and delayed recognition), non- 193  
13 verbal memory (immediate and delayed recognition), go-no-go response inhibition, 194  
14 problem solving, Stroop interference, finger tapping, catch game, staged information 195  
15 processing speed (single digit, two-digit and three-digit arithmetic), verbal function 196  
16 and visual spatial processing. Cognitive index scores were computed from the 197  
17 normalized outcome parameters for memory, executive function, attention, 198  
18 information processing speed, visual spatial, verbal function and motor skills 199  
19 domains.(27) A global cognitive score was computed as the average of all index 200  
20 scores for each individual. 201  
21  
22  
23  
24  
25  
26  
27  
28  
29  
30  
31  
32  
33

34 After administration, the NeuroTrax data were uploaded to the NeuroTrax central 202  
35 server, and outcome parameters were automatically calculated using software blind to 203  
36 diagnosis or testing site. To account for the well-known effects of age and education 204  
37 on cognitive performance, each outcome parameter was normalized and fit to an IQ- 205  
38 like scale (mean=100, S.D.=15) according to the patient's age and education. The 206  
39 normative data used by NeuroTrax consist of test data from cognitively healthy 207  
40 individuals in controlled research studies at more than 10 sites. (28) 208  
41  
42  
43  
44  
45  
46  
47  
48  
49

50 Specifically, the patients were given two different versions of the NeuroTrax test 209  
51 battery before and after HBOT, to allow repeated administrations with minimal 210  
52 learning effects. Test-retest reliability for these versions was evaluated and found to 211  
53  
54  
55  
56  
57  
58  
59  
60

1  
2  
3 be high, with no significant learning effect.(29, 30) Regarding the current study 212  
4 cohort, in a previous randomized controlled trial in patients suffering from TBI, the 213  
5 NeuroTrax scores were found to be stable in the retest of the control group.(21) 214  
6  
7  
8  
9

### 10 *Brain SPECT imaging* 215

11  
12 Brain activity was assessed using single photon emission computed tomography 216  
13 (SPECT) 1-2 weeks prior to and after the HBOT period. The imaging was conducted 217  
14 using 925–1,110 MBq (25–30 mCi) of a technetium-99m-methyl-cysteinate-dimer 218  
15 (Tc-99m-ECD) at 40–60 min post injection using a dual detector gamma camera 219  
16 (ECAM or Symbia T, Siemens Medical Systems) equipped with high resolution 220  
17 collimators. Data was acquired in 3-degree steps and reconstructed iteratively using 221  
18 the Chang method of ( $\mu = 0.12/\text{cm}$ ) attenuation correction.(31) 222  
19  
20  
21  
22  
23  
24  
25  
26  
27  
28

29 Both SPECT images were normalized to the median maximal brain activity in the 223  
30 entire brain and were then reoriented into Talairach space using NeuroGam (Segami 224  
31 Corporation) to identify Brodmann cortical areas and to compute the mean perfusion 225  
32 in each Brodmann area (BA). In addition, volume rendered brain perfusion images 226  
33 were reconstructed and normalized to the entire brain median maximal activity. All 227  
34 SPECT analyses were done by study team members who were blinded to the 228  
35 laboratory and clinical data. SPECT scans were performed late morning to midday. 229  
36  
37 On the day of the SPECT scan, patients were treated with only their chronic 230  
38 medications and were instructed not to smoke. Changes in perfusion in all Brodmann 231  
39 areas for each subject were determined by calculating the percentage of the difference 232  
40 of the normalized activity values between post-period and pre-period divided by the 233  
41 pre-period value. 234  
42  
43  
44  
45  
46  
47  
48  
49  
50  
51  
52  
53

### 54 *Statistical Analysis* 235

1  
2  
3 Continuous data were expressed as means  $\pm$  standard deviations. The normal 236  
4  
5 distribution for all variables was tested using the Kolmogorov-Smirnov test. The 237  
6  
7 mean differences between cognitive index scores before and after HBOT were 238  
8  
9 analyzed using one-way ANOVA with post-hoc Bonferoni tests. Multiple linear 239  
10  
11 regression models and multivariate logistic regression models were performed to 240  
12  
13 control for potential confounders and to determine independent predictors for clinical 241  
14  
15 outcome. The alpha level was set to 0.05. Data were statistically analyzed using SPSS 242  
16  
17 software (version 22.0). 243  
18  
19  
20  
21  
22  
23  
24  
25  
26  
27  
28  
29  
30  
31  
32  
33  
34  
35  
36  
37  
38  
39  
40  
41  
42  
43  
44  
45  
46  
47  
48  
49  
50  
51  
52  
53  
54  
55  
56  
57  
58  
59  
60

257

258

259

260

**Results***Patient profiles*

261

Of the 242 patients suffering from neurocognitive impairment due to TBI treated by HBOT between January 2008 and January 2017, 25 patients had potential additional brain insults and 63 did not have repeat computerized neurocognitive evaluations. Therefore, 154 patients were included in the final analysis, of whom 100 patients completed pre- and post-HBOT SPECT imaging (Figure-1).

The patients' baseline characteristics are summarized in Table 1. The average age was 42.7±14.6 years and 58.4% were males. All patients had documented traumatic brain injury 3 months to 33 years (mean 4.6±5.8, median 2.75 years) prior to HBOT. Sixty-nine (44.8%) had neurocognitive impairments due to mild TBI, 24 (15.6%) from moderate TBI and 61 (39.6%) from severe TBI. Most of the patients (86.2%) complained of cognitive impairment as their main symptom (Table 1).

Patients were treated with 40-70 (mean 52.0±9.9) sessions of hyperbaric oxygen at 1.5-2 ATA with 18 (12%) reporting adverse events which included mild barotrauma of the ears and palpitations/dyspnea while in the chamber.

*Severity of TBI*

276

Patients who suffered severe TBI were younger with higher proportion of males than in the mild and moderate TBI groups ( $P<0.0001$ ,  $P=0.002$  respectively, Table 1). As

278

1  
2  
3 expected, the severe group had significantly higher proportions of cognitive 279  
4 impairment and motor deficits ( $p=0.004$  and  $p<0.0001$  respectively, Table 1). Mild 280  
5 and moderate TBI had higher percentages of tinnitus and/or dizziness ( $p<0.0001$ , 281  
6  $p=0.002$  respectively, Table 1). 282

### 11 *Severe TBI* 283

13 Sixty-one patients had severe TBI. The main imaging findings at their admission are 284  
14 summarized in Figure-2. Of those 61 patients, 36 (59%) had surgical intervention 285  
15 during the acute event. 286

### 22 *Neuro-cognitive evaluation* 288

24  
25 The effect of HBOT on the patients' cognitive functions, as assessed by the eight 289  
26 cognitive summary scores, is summarized in Table 2 and Figure-3. As can be seen, 290  
27 HBOT induced significant improvements in all of the cognitive domains with a mean 291  
28 change of  $4.6\pm 8.5$  ( $p<0.00001$ ). The most prominent improvement was in memory 292  
29 index, with  $8.1\pm 16.9$  ( $p<0.00001$ ) and attention with  $6.8\pm 16.5$  ( $p<0.0001$ ) (Table 2, 293  
30 Figure-3). 294

31  
32 The mild TBI subgroup had the largest improvement in attention ( $8.8\pm 2.1$ ) followed 295  
33 by memory ( $7.9\pm 2.3$ ). Patients following moderate had noticeable improvements in 296  
34 memory ( $11.1\pm 3.1$ ) followed by information processing speed ( $6.6\pm 3.5$ ) (Figure-4). 297

35  
36 The magnitude of the change in a cognitive score has different implications for 298  
37 patients at low or high baseline levels. Therefore, we further inspected the effect of 299  
38 HBOT on the relative changes, i.e. the changes relative to the baseline value, in each 300  
39 of the cognitive measured indexes. Marked improvement defined as  $>10\%$  increase 301



1  
2  
3 compared to baseline cognitive index were found with different percentages in all 302  
4  
5 study groups as summarized in Table 3. 303  
6

7 304  
8  
9 *Confounders* 305  
10

11 Relative change higher than 10% from baseline was considered a significant clinical 306  
12 improvement. Age, gender, education level, TBI severity, the time from injury to 307  
13 HBOT, HBOT protocol and number of sessions had no significant effect on the 308  
14 clinical improvement in both general, memory, attention, information processing 309  
15 speed and executive functions domains ( $p>0.05$ ). 310  
16  
17

18  
19  
20  
21  
22 311  
23  
24 *Metabolic imaging of the brain-SPECT* 312  
25

26  
27 One hundred patients had brain SPECT evaluations before and after HBOT. When 313  
28 calculating the mean relative change in each cortical Brodmann's area for the entire 314  
29 cohort, the largest changes were in the anterior temporal tip areas (BA 38, 28, 20) 315  
30 and prefrontal cortex (BA 10) (Figure-5). However, these change were minor, in the 316  
31 scale of 3-4% relative change. Further analysis per TBI severity group revealed 317  
32 several differences in Brodmann areas with involvement of the perirhinal cortex (BA 318  
33 36) and the primary visual cortex (BA 18) as seen in the Figure-6. 319  
34  
35

36  
37 To correlate SPECT imaging and the cognitive changes, analysis was performed on 320  
38 the top twenty patients who had the largest cognitive improvement ( $>10\%$  relative 321  
39 increase from baseline). There was a significantly larger magnitude of metabolism 322  
40 increase (5-8%), compared to the entire cohort average increase (2-4%) ( $p<0.05$ ). The 323  
41 most striking changes were found in the anterior cingulate (BA 24) and the post- 324  
42 central cortex (BA 5), the prefrontal areas (Ba 10,11, 46) and temporal areas (BA 20, 325  
43 BA 38, 36). 326  
44  
45  
46  
47  
48  
49  
50  
51  
52  
53  
54  
55  
56  
57  
58  
59  
60

327

328

329

330

**Discussion**

331

The present study demonstrates the neurotherapeutic effects of HBOT for chronic TBI of all severities. Even though treatment started during late chronic stages (mean 4.6±5.8 years, median 2.75 years) after the acute insult, HBOT was found to be effective regardless of the TBI severity. The clinical improvements seen in all cognitive domains were well documented by objective computerized neurocognitive tests. The most significant measurable improvements were in memory, attention and executive function. We found the clinical improvement to be well correlated with increased brain activity in relevant brain areas, with significantly higher increases in patients with better cognitive improvements.

Numerous mechanisms of cellular and vascular repair by HBOT have been suggested in addition to tissue oxygenation.(5) These include improved mitochondrial function and cellular metabolism, improved BBB and inflammatory reactions, reduced apoptosis, alleviation of oxidative stress, increased levels of neurotrophins and nitric oxide, and upregulation of axonal guidance agents.(5, 13, 32) Moreover, the effects of HBOT on neurons can be mediated indirectly by glial cells. HBOT may also promote neurogenesis of endogenous neural stem cells.(13, 32) The common denominator underlying all these mechanisms is that they are oxygen-dependent. HBOT may enable the metabolic change simply by supplying the missing energy/oxygen needed for these regeneration processes (32). The induction of angiogenesis and improved brain metabolism, as demonstrated in this study, may

1  
2  
3 serve as the infrastructure that enables the regenerative process and the preservation 352  
4  
5 of newly generated neuronal functioning. (14, 33) 353  
6

7 354  
8  
9  
10 The correlation between specific cognitive function improvements with the metabolic 355  
11  
12 brain imaging changes gives further strength to the study results and serves as an 356  
13  
14 excellent tool for gaining better understanding of brain functionality (Figure-6): 357  
15

16  
17 - The perirhinal cortex activation after HBOT was most prominent in patients 358  
18  
19 that had significant memory improvement. The perirhinal cortex has a critical 359  
20  
21 role in object recognition memory while interacting with the 360  
22  
23 hippocampus.(34) Since the memory assessments in the cognitive tests were 361  
24  
25 indeed recognition tasks, this area is expected to be involved. 362  
26  
27

28 -The pre-frontal cortex (BA 10, 11) and more specifically, the inferior frontal 363  
29  
30 gyrus (BA 46, 47) activation after HBOT were prominent in all patients with 364  
31  
32 significant executive function improvements. The right frontal gyrus is known 365  
33  
34 to mediate a go/no go task,(35) which was among the executive function tests 366  
35  
36 used in the present study. The prefrontal gyrus is presumed to act as a filtering 367  
37  
38 system that enhances goal directed activities and inhibits irrelevant activations. 368  
39  
40 This filtering mechanism enables executive control.(36) 369  
41  
42

43 -The anterior cingulate gyrus (BA 24) activation after HBOT was seen in the 370  
44  
45 subjects with attention improvement. The anterior cingulate gyrus is presumed 371  
46  
47 to be involved in error detection, especially in a Stroop task,(37) which was 372  
48  
49 used in the attention tests. Lesions in this area can cause inattention to akinetic 373  
50  
51 mutism.(37) 374  
52

53  
54 375  
55  
56  
57  
58  
59  
60

1  
2  
3 This study has several limitations. The major one relates to its retrospective 376  
4 methodology. This limitation should be considered even though this large cohort of 377  
5 patients was treated at late chronic stages. The findings presented here are in 378  
6 agreement and reinforce the findings from previous prospective controlled trials in 379  
7 which the neuroplasticity effects of HBOT were demonstrated in chronic stages of 380  
8 different types of brain injuries.(15, 21, 38, 39) Moreover, the correlation between the 381  
9 changes in cognitive function and the metabolic brain imaging gives further strength 382  
10 to the results. 383  
11  
12

13  
14 Another important limitation relates to the HBOT protocol which was inconsistent in 384  
15 the cohort. Although significant neurotherapeutic effects were seen with 60 minutes 385  
16 of 1.5 ATA, the optimal protocol needed to induce maximal neuroplasticity for the 386  
17 specific individual with minimal side effects has not been specified. 387  
18  
19

20  
21  
22 The strengths of the study are worth mentioning. First, objective cognitive 389  
23 assessments using computerized tests were performed to each patient both pre- and 390  
24 post-treatment. Objective measures are significantly superior to PCS questionnaires 391  
25 which are inaccurate, variable and contain various confounders rather than reflect the 392  
26 true PCS state.(40) Second, most of the patients in the study underwent an objective 393  
27 ancillary brain SPECT to confirm PCS diagnosis prior to HBOT. This practice is 394  
28 crucial when considering the differential diagnosis following TBI (PTSD, depression, 395  
29 etc.). Moreover, post-treatment brain SPECTs enabled an anatomical-functional 396  
30 correlation in regards to HBOT's effect in brain neuroplasticity. Third, the study 397  
31 cohort included a civilian population that does not have any potential secondary gain 398  
32 (such as financial compensation by reporting sick). 399  
33  
34  
35  
36  
37  
38  
39  
40  
41  
42  
43  
44  
45  
46  
47  
48  
49  
50  
51  
52  
53  
54  
55  
56  
57  
58  
59  
60

**Conclusions**

HBOT induced significant cognitive improvements in patients who suffer from chronic neurocognitive deficits due to mild, moderate and severe TBI. The improvement in memory correlated with activation of the perirhinal cortex, improvement of executive functions correlated with activation of the inferior frontal gyrus and improvement in attention correlated with activation of the anterior cingulate gyrus.

For peer review only

## References

1. Coronado VG, Xu L, Basavaraju SV, McGuire LC, Wald MM, Faul MD, et al. Surveillance for traumatic brain injury-related deaths--United States, 1997-2007. *MMWR Surveill Summ.* 2011;60(5):1-32. Epub 2011/05/06. PubMed PMID: 21544045.
2. Bazarian JJ, Wong T, Harris M, Leahey N, Mookerjee S, Dombrov M. Epidemiology and predictors of post-concussive syndrome after minor head injury in an emergency population. *Brain injury : [BI].* 1999;13(3):173-89. PubMed PMID: 10081599.
3. Kashluba S, Paniak C, Blake T, Reynolds S, Toller-Lobe G, Nagy J. A longitudinal, controlled study of patient complaints following treated mild traumatic brain injury. *Archives of clinical neuropsychology : the official journal of the National Academy of Neuropsychologists.* 2004;19(6):805-16. doi: 10.1016/j.acn.2003.09.005. PubMed PMID: 15288333.
4. Figueroa XA, Wright JK. Hyperbaric oxygen: B-level evidence in mild traumatic brain injury clinical trials. *Neurology.* 2016;87(13):1400-6. Epub 2016/09/02. doi: 10.1212/WNL.0000000000003146. PubMed PMID: 27581219.
5. Efrati S, Ben-Jacob E. Reflections on the neurotherapeutic effects of hyperbaric oxygen. *Expert review of neurotherapeutics.* 2014;14(3):233-6. doi: 10.1586/14737175.2014.884928. PubMed PMID: 24471697.
6. Medana IM, Esiri MM. Axonal damage: a key predictor of outcome in human CNS diseases. *Brain.* 2003;126(Pt 3):515-30. Epub 2003/02/05. PubMed PMID: 12566274.
7. Kochanek PM, Clark, R.S.B., & Jenkins, L.W. TBI :Pathobiology. In: Zasler ND, Katz, D.I., Zafonte, R.D., editor. *Brain injury medicine.* NY: Demos medical publishing; 2007. p. 81-92.
8. Kushner D. Mild traumatic brain injury: toward understanding manifestations and treatment. *Arch Intern Med.* 1998;158(15):1617-24. Epub 1998/08/13. PubMed PMID: 9701095.
9. Sohlberg MM, Mateer CA. *Cognitive Rehabilitation: An Integrative Neuropsychological Approach.* NY: The Guilford Press; 2001.
10. Kim J, Whyte J, Patel S, Avants B, Europa E, Wang J, et al. Resting cerebral blood flow alterations in chronic traumatic brain injury: an arterial spin labeling perfusion fMRI study. *Journal of neurotrauma.* 2010;27(8):1399-411. doi: 10.1089/neu.2009.1215. PubMed PMID: 20528163; PubMed Central PMCID: PMC2967826.
11. Ostergaard L, Engedal TS, Aamand R, Mikkelsen R, Iversen NK, Anzabi M, et al. Capillary transit time heterogeneity and flow-metabolism coupling after traumatic brain injury. *Journal of cerebral blood flow and metabolism : official journal of the International Society of Cerebral Blood Flow and Metabolism.* 2014;34(10):1585-98. doi: 10.1038/jcbfm.2014.131. PubMed PMID: 25052556; PubMed Central PMCID: PMC4269727.
12. Stein SC, Graham DI, Chen XH, Smith DH. Association between intravascular microthrombosis and cerebral ischemia in traumatic brain injury. *Neurosurgery.* 2004;54(3):687-91; discussion 91. PubMed PMID: 15028145.

1  
2  
3  
4  
5  
6  
7  
8  
9  
10  
11  
12  
13  
14  
15  
16  
17  
18  
19  
20  
21  
22  
23  
24  
25  
26  
27  
28  
29  
30  
31  
32  
33  
34  
35  
36  
37  
38  
39  
40  
41  
42  
43  
44  
45  
46  
47  
48  
49  
50  
51  
52  
53  
54  
55  
56  
57  
58  
59  
60

13. Efrati S, Ben-Jacob E. Reflections on the neurotherapeutic effects of hyperbaric oxygen. *Expert Rev Neurother*. 2014;14(3):233-6. Epub 2014/01/30. doi: 10.1586/14737175.2014.884928. PubMed PMID: 24471697. 465  
466  
467
14. Jiang Q, Zhang ZG, Ding GL, Zhang L, Ewing JR, Wang L, et al. Investigation of neural progenitor cell induced angiogenesis after embolic stroke in rat using MRI. *NeuroImage*. 2005;28(3):698-707. doi: 10.1016/j.neuroimage.2005.06.063. PubMed PMID: 16112879. 468  
469  
470
15. Tal S, Hadanny A, Berkovitz N, Sasson E, Ben-Jacob E, Efrati S. Hyperbaric oxygen may induce angiogenesis in patients suffering from prolonged post-concussion syndrome due to traumatic brain injury. *Restor Neurol Neurosci*. 2015;33(6):943-51. doi: 10.3233/RNN-150585. PubMed PMID: 26484702. 471  
472  
473  
474
16. Wolf G, Cifu D, Baugh L, Carne W, Profenna L. The effect of hyperbaric oxygen on symptoms after mild traumatic brain injury. *Journal of neurotrauma*. 2012;29(17):2606-12. doi: 10.1089/neu.2012.2549. PubMed PMID: 23031217. 475  
476  
477
17. Cifu DX, Hoke KW, Wetzell PA, Wares JR, Gitchel G, Carne W. Effects of hyperbaric oxygen on eye tracking abnormalities in males after mild traumatic brain injury. *Journal of rehabilitation research and development*. 2014;51(7):1047-56. doi: 10.1682/JRRD.2014.01.0013. PubMed PMID: 25436771. 478  
479  
480  
481
18. Miller RS, Weaver LK, Bahraini N, Churchill S, Price RC, Skiba V, et al. Effects of hyperbaric oxygen on symptoms and quality of life among service members with persistent postconcussion symptoms: a randomized clinical trial. *JAMA internal medicine*. 2015;175(1):43-52. doi: 10.1001/jamainternmed.2014.5479. PubMed PMID: 25401463. 482  
483  
484  
485
19. Smith-Seemiller L, Fow NR, Kant R, Franzen MD. Presence of post-concussion syndrome symptoms in patients with chronic pain vs mild traumatic brain injury. *Brain injury*. 2003;17(3):199-206. PubMed PMID: 12623496. 486  
487  
488
20. Hadanny A, Efrati S. Treatment of persistent post-concussion syndrome due to mild traumatic brain injury: current status and future directions. *Expert Rev Neurother*. 2016;16(8):875-87. doi: 10.1080/14737175.2016.1205487. PubMed PMID: 27337294. 489  
490  
491
21. Boussi-Gross R, Golan H, Fishlev G, Bechor Y, Volkov O, Bergan J, et al. Hyperbaric oxygen therapy can improve post concussion syndrome years after mild traumatic brain injury - randomized prospective trial. *PLoS One*. 2013;8(11):e79995. doi: 10.1371/journal.pone.0079995. PubMed PMID: 24260334; PubMed Central PMCID: PMC3829860. 492  
493  
494  
495  
496
22. Efrati S, Ben-Jacob E. How and why hyperbaric oxygen therapy can bring new hope for children suffering from cerebral palsy--an editorial perspective. *Undersea & hyperbaric medicine : journal of the Undersea and Hyperbaric Medical Society, Inc*. 2014;41(2):71-6. PubMed PMID: 24851543. 497  
498  
499  
500
23. Etzion Y, Grossman Y. Pressure-induced depression of synaptic transmission in the cerebellar parallel fibre synapse involves suppression of presynaptic N-type Ca<sup>2+</sup> channels. *Eur J Neurosci*. 2000;12(11):4007-16. Epub 2000/11/09. PubMed PMID: 11069597. 501  
502  
503
24. Berman S, Abu Hamad R, Efrati S. Mesangial cells are responsible for orchestrating the renal podocytes injury in the context of malignant hypertension. *Nephrology (Carlton)*. 2013;18(4):292-8. Epub 2013/03/01. doi: 10.1111/nep.12043. PubMed PMID: 23445449. 504  
505  
506
25. Malec JF, Brown AW, Leibson CL, Flaada JT, Mandrekar JN, Diehl NN, et al. The mayo classification system for traumatic brain injury severity. *Journal of neurotrauma*. 2007;24(9):1417-24. doi: 10.1089/neu.2006.0245. PubMed PMID: 17892404. 507  
508  
509
26. Dwolatzky T, Whitehead V, Doniger GM, Simon ES, Schweiger A, Jaffe D, et al. Validity of a novel computerized cognitive battery for mild cognitive impairment. *BMC geriatrics*. 2003;3:4. doi: 10.1186/1471-2318-3-4. PubMed PMID: 14594456; PubMed Central PMCID: PMC270050. 510  
511  
512  
513
27. Zur D, Naftaliev E, Kesler A. Evidence of Multidomain Mild Cognitive Impairment in Idiopathic Intracranial Hypertension. *Journal of neuro-ophthalmology : the official journal of* 514  
515



- 1  
2  
3 the North American Neuro-Ophthalmology Society. 2014. doi: 516  
4 10.1097/WNO.000000000000199. PubMed PMID: 25383589. 517  
5 28. Doniger GM. Guide to Normative Data 2014 [cited 2014 July, 16th]. Available from: 518  
6 [http://www1.neurotrax.com/docs/norms\\_guide.pdf](http://www1.neurotrax.com/docs/norms_guide.pdf). 519  
7 29. Melton JL. Psychometric evaluation of the Mindstreams neuropsychological 520  
8 screening tool. Panama City (FL): Navy Experimental Diving Unit (US), 2005 NEDU TR. 521  
9 30. A. Schweiger GMD, T. Dwolatzky, D. Jaffe, E.S. Simon RELIABILITY OF A NOVEL 522  
10 COMPUTERIZED NEUROPSYCHOLOGICAL BATTERY FOR MILD COGNITIVE IMPAIRMENT. ACTA 523  
11 NEUROPSYCHOLOGICA. 2003;1(4):407-13. 524  
12 31. Jaszczak RJ, Chang LT, Stein NA, Moore FE. Whole-body single-photon emission 525  
13 computed tomography using dual, large-field-of-view scintillation cameras. Physics in 526  
14 medicine and biology. 1979;24(6):1123-43. PubMed PMID: 316897. 527  
15 32. Efrati S, Fishlev G, Bechor Y, Volkov O, Bergan J, Kliakhandler K, et al. Hyperbaric 528  
16 oxygen induces late neuroplasticity in post stroke patients--randomized, prospective trial. 529  
17 PloS one. 2013;8(1):e53716. doi: 10.1371/journal.pone.0053716. PubMed PMID: 23335971; 530  
18 PubMed Central PMCID: PMC3546039. 531  
19 33. Chen J, Zhang ZG, Li Y, Wang L, Xu YX, Gautam SC, et al. Intravenous administration 532  
20 of human bone marrow stromal cells induces angiogenesis in the ischemic boundary zone 533  
21 after stroke in rats. Circ Res. 2003;92(6):692-9. Epub 2003/03/01. doi: 534  
22 10.1161/01.RES.0000063425.51108.8D. PubMed PMID: 12609969. 535  
23 34. Brown MW, Aggleton JP. Recognition memory: what are the roles of the perirhinal 536  
24 cortex and hippocampus? Nature reviews Neuroscience. 2001;2(1):51-61. doi: 537  
25 10.1038/35049064. PubMed PMID: 11253359. 538  
26 35. Aron AR, Robbins TW, Poldrack RA. Inhibition and the right inferior frontal cortex. 539  
27 Trends in cognitive sciences. 2004;8(4):170-7. doi: 10.1016/j.tics.2004.02.010. PubMed 540  
28 PMID: 15050513. 541  
29 36. Miller EK, Cohen JD. An integrative theory of prefrontal cortex function. Annual 542  
30 review of neuroscience. 2001;24:167-202. doi: 10.1146/annurev.neuro.24.1.167. PubMed 543  
31 PMID: 11283309. 544  
32 37. Bush G, Luu P, Posner MI. Cognitive and emotional influences in anterior cingulate 545  
33 cortex. Trends in cognitive sciences. 2000;4(6):215-22. PubMed PMID: 10827444. 546  
34 38. Harch PG. Hyperbaric oxygen in chronic traumatic brain injury: oxygen, pressure, 547  
35 and gene therapy. Medical gas research. 2015;5:9. doi: 10.1186/s13618-015-0030-6. 548  
36 PubMed PMID: 26171141; PubMed Central PMCID: PMC4499900. 549  
37 39. Harch PG, Andrews SR, Fogarty EF, Amen D, Pezzullo JC, Lucarini J, et al. A phase I 550  
38 study of low-pressure hyperbaric oxygen therapy for blast-induced post-concussion 551  
39 syndrome and post-traumatic stress disorder. Journal of neurotrauma. 2012;29(1):168-85. 552  
40 doi: 10.1089/neu.2011.1895. PubMed PMID: 22026588. 553  
41 40. Potter S, Leigh E, Wade D, Fleminger S. The Rivermead Post Concussion Symptoms 554  
42 Questionnaire: a confirmatory factor analysis. Journal of neurology. 2006;253(12):1603-14. 555  
43 doi: 10.1007/s00415-006-0275-z. PubMed PMID: 17063314. 556  
44  
45  
46  
47  
48  
49  
50  
51  
52  
53  
54  
55  
56  
57  
58  
59



Table 1: Baseline patient characteristics.

561

| Characteristics           | Total      | Mild TBI   | Moderate TBI | Severe TBI | Significance       |
|---------------------------|------------|------------|--------------|------------|--------------------|
| <b>Number of patients</b> | 154 (100%) | 69 (44.8%) | 24 (15.6%)   | 61 (39.6%) |                    |
| <b>Age (years)</b>        | 42.7±14.6  | 48.8±12.0  | 41.7±12.7    | 36.2±15.3  | <b>P&lt;0.0001</b> |
| <b>Sex</b>                |            |            |              |            |                    |
| Males                     | 90 (58.4%) | 31 (44.9%) | 13 (54.2%)   | 46 (75.4%) | <b>P=0.002</b>     |
| Females                   | 64 (41.6%) | 38 (55.1%) | 11 (45.8%)   | 15 (24.6%) |                    |
| <b>Education (years)</b>  | 14.8±3.3   | 14.9±3.6   | 14.9±3.3     | 14.6±3.1   | P=0.895            |
| <b>Traumatic event</b>    |            |            |              |            |                    |

|                                 |             |            |            |            |                |
|---------------------------------|-------------|------------|------------|------------|----------------|
| Motor Vehicle                   |             |            |            |            |                |
| Accident                        | 116 (75.3%) | 56 (81.2%) | 17 (70.8%) | 43 (70.5%) | <b>P=0.048</b> |
| Fall                            | 21 (13.6%)  | 8 (11.6%)  | 1 (4.2%)   | 12 (57.1%) |                |
| Blow                            | 12 (7.8%)   | 5 (7.2%)   | 5 (20.8%)  | 2 (3.3%)   |                |
| Blast                           | 4 (2.6%)    | 0          | 1 (4.2%)   | 3 (4.9%)   |                |
| Penetrating                     | 1 (0.6%)    | 0          | 0          | 1 (0.6%)   |                |
| <b>Time from trauma (years)</b> | 4.6±5.8     | 4.4±5.9    | 5.0±5.8    | 4.6±5.7    | <b>P=0.923</b> |

562

563

Table 1: Patient characteristics (continued).

564

| Characteristics     | Total       | Mild TBI   | Moderate TBI | Severe TBI | Significance       |
|---------------------|-------------|------------|--------------|------------|--------------------|
| <b>Symptoms</b>     |             |            |              |            |                    |
| Cognitive           | 100 (86.2%) | 38 (74.5%) | 19 (90.5%)   | 43 (97.7%) | <b>P=0.004</b>     |
| Motor               | 22 (19.0%)  | 1 (4.8%)   | 1 (4.8%)     | 20 (45.5%) | <b>P&lt;0.0001</b> |
| Sensory             | 32 (27.6%)  | 12 (23.5%) | 7 (33.3%)    | 13 (29.5%) | P=0.653            |
| Dizziness/Vertigo   | 17 (14.7%)  | 14 (27.5%) | 2 (9.5%)     | 1 (2.3%)   | <b>P=0.002</b>     |
| Tinnitus            | 30 (25.9%)  | 26 (51.0%) | 2 (9.5%)     | 2 (4.5%)   | <b>P&lt;0.0001</b> |
| Headaches           | 20 (17.2%)  | 12 (23.5%) | 3 (14.3%)    | 5 (11.4%)  | P=0.272            |
| <b>HBO sessions</b> | 52.0±9.9    | 49.4±10.1  | 49.0±10.3    | 56.1±8.2   | <b>P=0.0001</b>    |

1  
2  
3  
4  
5  
6  
7  
8  
9  
10  
11  
12  
13  
14  
15  
16  
17  
18  
19  
20  
21  
22  
23  
24  
25  
26  
27  
28  
29  
30  
31  
32  
33  
34  
35  
36  
37  
38  
39  
40  
41  
42  
43  
44  
45  
46  
47

|                           |     |             |            |            |            |         |
|---------------------------|-----|-------------|------------|------------|------------|---------|
| <b>HBO protocol (ATA)</b> | 1.5 | 106 (69.3%) | 46 (67.6%) | 18 (75.0%) | 42 (68.9%) | P=0.795 |
|                           | 2   | 47 (30.7%)  | 22 (32.4%) | 6 (25.0%)  | 19 (31.1%) |         |
| <b>Adverse Events</b>     |     | 18 (12.0%)  | 10 (15.2%) | 3 (12.5%)  | 5 (8.3%)   | P=0.499 |

565

566

567

568

569

570

571

572

573

574

1  
2  
3  
4  
5  
6  
7  
8  
9  
10  
11  
12  
13  
14  
15  
16  
17  
18  
19  
20  
21  
22  
23  
24  
25  
26  
27  
28  
29  
30  
31  
32  
33  
34  
35  
36  
37  
38  
39  
40  
41  
42  
43  
44  
45  
46  
47

Table 2: Cognitive indices pre- and post-HBOT of the whole study cohort

575

576

|                     | <b>Baseline</b> | <b>Post HBOT</b> | <b>Mean Change</b> | <b>P-Value</b>     |
|---------------------|-----------------|------------------|--------------------|--------------------|
| General             | 88.3±15.2       | 92.9±14.2        | 4.6±8.5            | <b>P&lt;0.0001</b> |
| Memory              | 81.7±23.2       | 89.9±21.9        | 8.1±16.9           | <b>P&lt;0.0001</b> |
| Executive Functions | 88.3±16.6       | 94.2±15.1        | 5.9±12.0           | <b>P&lt;0.0001</b> |
| Attention           | 84.3±20.5       | 91.1±18.4        | 6.8±16.5           | <b>P&lt;0.0001</b> |
| IPS                 | 87.5±17.0       | 92.4±15.7        | 4.9±13.1           | <b>P&lt;0.0001</b> |

1  
2  
3  
4  
5  
6  
7  
8  
9  
10  
11  
12  
13  
14  
15  
16  
17  
18  
19  
20  
21  
22  
23  
24  
25  
26  
27  
28  
29  
30  
31  
32  
33  
34  
35  
36  
37  
38  
39  
40  
41  
42  
43  
44  
45  
46  
47

|              |           |           |          |                    |
|--------------|-----------|-----------|----------|--------------------|
| VSP          | 95.0±18.0 | 98.5±18.0 | 3.4±14.6 | <b>P=0.005</b>     |
| Motor skills | 92.3±17.3 | 96.2±14.5 | 3.9±11.7 | <b>P&lt;0.0001</b> |

577  
578  
579  
580  
581  
582  
583  
584  
585  
586  
587  
588

For peer review only

1  
2  
3  
4  
5  
6  
7  
8  
9  
10  
11  
12  
13  
14  
15  
16  
17  
18  
19  
20  
21  
22  
23  
24  
25  
26  
27  
28  
29  
30  
31  
32  
33  
34  
35  
36  
37  
38  
39  
40  
41  
42  
43  
44  
45  
46  
47

Table 3: Large significant increases (>10% change) in cognitive indices proportions across TBI subgroups.

589

|                              | Total      | Mild TBI   | Moderate TBI | Severe TBI |                |
|------------------------------|------------|------------|--------------|------------|----------------|
| General                      | 36 (23.4%) | 15 (21.7%) | 7(29.2%)     | 14 (23.0%) | P=0.756        |
| Memory                       | 64 (41.6%) | 28 (40.6%) | 9 (37.5%)    | 27 (44.3%) | P=0.830        |
| Executive functions          | 51 (33.1%) | 23 (33.3%) | 7 (29.2%)    | 21 (34.9%) | P=0.897        |
| Attention                    | 62 (40.3%) | 27 (39.1%) | 8 (33.3%)    | 27 (44.3%) | P=0.631        |
| Information processing speed | 48 (31.2%) | 23 (33.3%) | 12 (50%)     | 13 (21.3%) | <b>P=0.032</b> |

590

591

592

|    |                                                                                   |     |
|----|-----------------------------------------------------------------------------------|-----|
| 1  |                                                                                   |     |
| 2  |                                                                                   |     |
| 3  | <b>Figures legends</b>                                                            | 593 |
| 4  |                                                                                   |     |
| 5  | Figure-1: Patients flowchart.                                                     | 594 |
| 6  |                                                                                   |     |
| 7  | Figure-2: Imaging findings in the severe TBI subgroup                             | 595 |
| 8  |                                                                                   |     |
| 9  | Figure-3: Mean changes of post- compared to pre-HBOT for the entire cohort.       | 596 |
| 10 |                                                                                   |     |
| 11 |                                                                                   |     |
| 12 | After HBOT, all cognitive domains improved significantly, where the most striking | 597 |
| 13 |                                                                                   |     |
| 14 | changes were seen in memory and attention.                                        | 598 |
| 15 |                                                                                   |     |
| 16 |                                                                                   |     |
| 17 | *p<0.0001, **p=0.005, IPS=information processing speed                            | 599 |
| 18 |                                                                                   |     |
| 19 |                                                                                   |     |
| 20 | Figure-4: Mean changes of post- compared to pre-HBOT across the different TBI     | 600 |
| 21 |                                                                                   |     |
| 22 | severities.                                                                       | 601 |
| 23 |                                                                                   |     |
| 24 |                                                                                   |     |
| 25 | Both patients who suffered mild and severe TBI had improvements in general,       | 602 |
| 26 |                                                                                   |     |
| 27 | memory, attention, information processing speed and motor skills scores whereas   | 603 |
| 28 |                                                                                   |     |
| 29 | patients who suffered moderate TBI had significant improvement in memory.         | 604 |
| 30 |                                                                                   |     |
| 31 |                                                                                   |     |
| 32 | *p<0.05, IPS =information processing speed                                        | 605 |
| 33 |                                                                                   |     |
| 34 |                                                                                   |     |
| 35 | Figure-5: The mean relative change in broadmann areas post HBOT for the entire    | 606 |
| 36 |                                                                                   |     |
| 37 | study cohort.                                                                     | 607 |
| 38 |                                                                                   |     |
| 39 |                                                                                   |     |
| 40 | Figure-6: Cognitive functions correlated with Broadmann areas.                    | 608 |
| 41 |                                                                                   |     |
| 42 |                                                                                   |     |
| 43 | Each of the TBI severities (mild, moderate and severe) had perfusion/metabolism   | 609 |
| 44 |                                                                                   |     |
| 45 | increase in specific Broadmann areas correlated with improved cognitive function. | 610 |
| 46 |                                                                                   |     |
| 47 |                                                                                   |     |
| 48 |                                                                                   |     |
| 49 |                                                                                   | 611 |
| 50 |                                                                                   |     |
| 51 |                                                                                   |     |
| 52 |                                                                                   |     |
| 53 |                                                                                   |     |
| 54 |                                                                                   |     |
| 55 |                                                                                   |     |
| 56 |                                                                                   |     |
| 57 |                                                                                   |     |
| 58 |                                                                                   |     |
| 59 |                                                                                   |     |
| 60 |                                                                                   |     |



1  
2  
3  
4  
5  
6  
7  
8  
9  
10  
11  
12  
13  
14  
15  
16  
17  
18  
19  
20  
21  
22  
23  
24  
25  
26  
27  
28  
29  
30  
31  
32  
33  
34  
35  
36  
37  
38  
39  
40  
41  
42  
43  
44  
45  
46  
47  
48  
49  
50  
51  
52  
53  
54  
55  
56  
57  
58  
59  
60

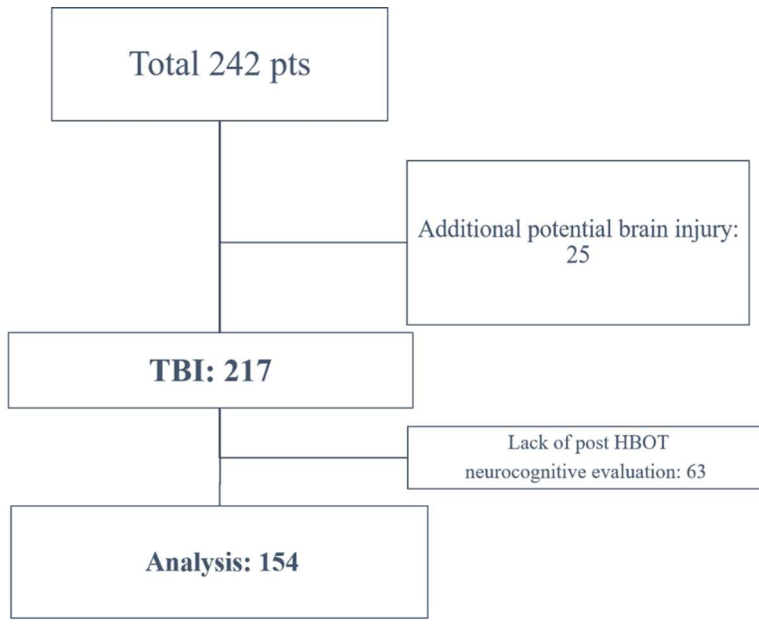

Patients flowchart

334x232mm (300 x 300 DPI)

iew only

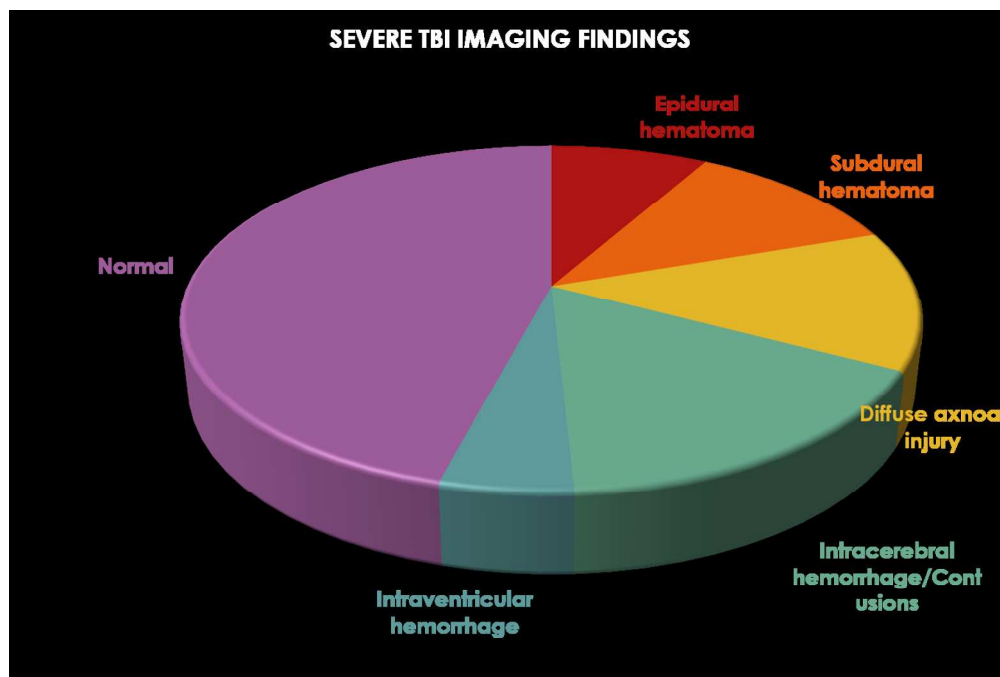

Imaging findings in the severe TBI subgroup

230x154mm (300 x 300 DPI)

view only

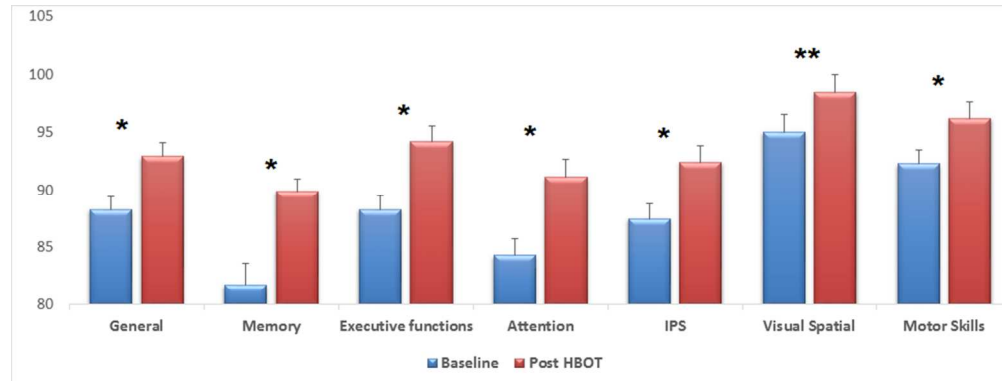

Mean changes of post- compared to pre-HBOT for the entire cohort.  
After HBOT, all cognitive domains improved significantly, where the most striking changes were seen in memory and attention.

\* $p < 0.0001$ , \*\* $p = 0.005$ , IPS=information processing speed

204x77mm (300 x 300 DPI)

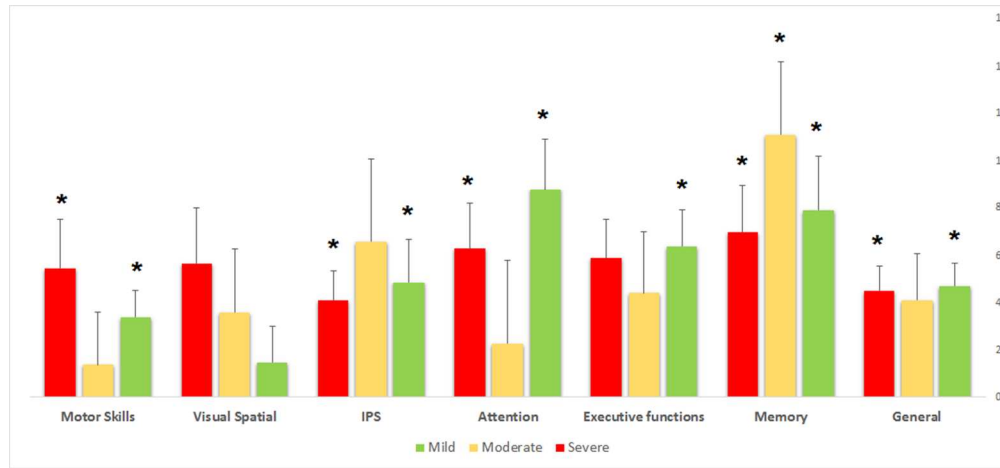

Mean changes of post- compared to pre-HBOT across the different TBI severities. Both patients who suffered mild and severe TBI had improvements in general, memory, attention, information processing speed and motor skills scores whereas patients who suffered moderate TBI had significant improvement in memory. \*p<0.05, IPS =information processing speed

225x104mm (300 x 300 DPI)

review only

1  
2  
3  
4  
5  
6  
7  
8  
9  
10  
11  
12  
13  
14  
15  
16  
17  
18  
19  
20  
21  
22  
23  
24  
25  
26  
27  
28  
29  
30  
31  
32  
33  
34  
35  
36  
37  
38  
39  
40  
41  
42  
43  
44  
45  
46  
47  
48  
49  
50  
51  
52  
53  
54  
55  
56  
57  
58  
59  
60

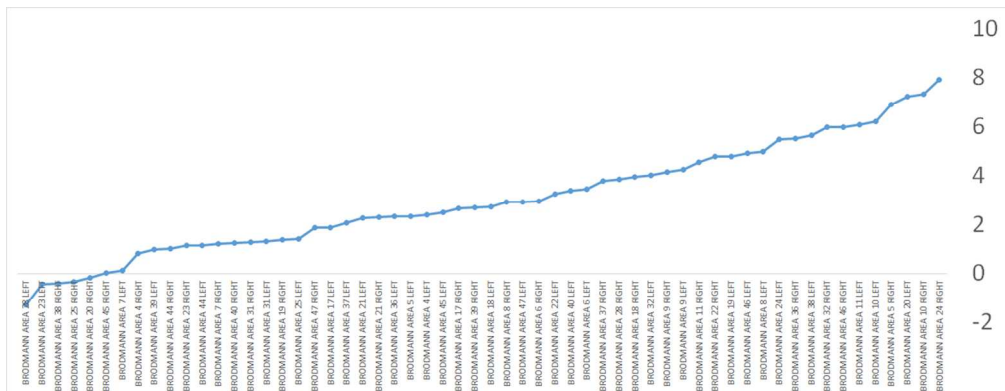

The mean relative change in broadmann areas post HBOT for the entire study cohort  
 261x101mm (300 x 300 DPI)

Peer review only

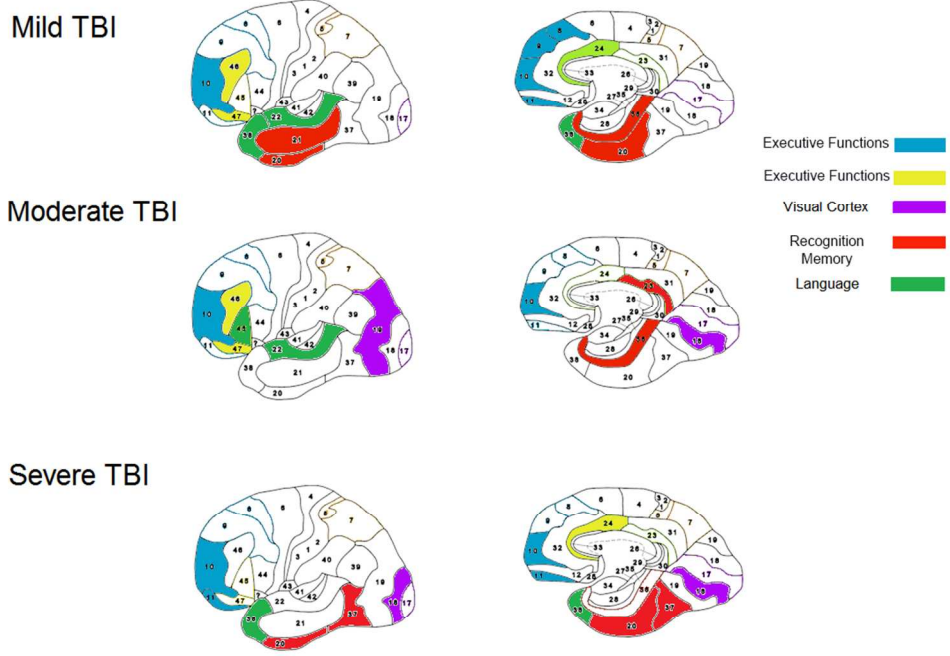

Cognitive functions correlated with Brodmann areas.  
 Each of the TBI severities (mild, moderate and severe) had perfusion/metabolism increase in specific Brodmann areas correlated with improved cognitive function

240x173mm (300 x 300 DPI)

view only

# BMJ Open

## The effect of hyperbaric oxygen therapy on chronic neurocognitive function of deficits post traumatic brain injury patients – retrospective analysis

|                                 |                                                                                                                                                                                                                                                                                                                                                                                                                                                                                                                                                                                          |
|---------------------------------|------------------------------------------------------------------------------------------------------------------------------------------------------------------------------------------------------------------------------------------------------------------------------------------------------------------------------------------------------------------------------------------------------------------------------------------------------------------------------------------------------------------------------------------------------------------------------------------|
| Journal:                        | <i>BMJ Open</i>                                                                                                                                                                                                                                                                                                                                                                                                                                                                                                                                                                          |
| Manuscript ID                   | bmjopen-2018-023387.R1                                                                                                                                                                                                                                                                                                                                                                                                                                                                                                                                                                   |
| Article Type:                   | Research                                                                                                                                                                                                                                                                                                                                                                                                                                                                                                                                                                                 |
| Date Submitted by the Author:   | 31-May-2018                                                                                                                                                                                                                                                                                                                                                                                                                                                                                                                                                                              |
| Complete List of Authors:       | Hadanny, Amir; Galilee Medical Center, Neurosurgery; Assaf Harofeh Medical Center, Sagol Center for Hyperbaric Medicine and Research<br>Abbott, Stefanie; Asaf Harofeh Medical Center, Sagol Center for Hyperbaric Medicine and Research<br>Suzin, Gil; Asaf Harfoeh Medical Center, Sagol Center for Hyperbaric Medicine and Research<br>Bechor, Yair; Asaf Harofeh Medical Center, Sagol Center for Hyperbaric Medicine and Research<br>Efrati, Shai; Assaf Harofeh Medical Center, Sagol Center for Hyperbaric Medicine and Research; Tel Aviv University, Sackler School of Medicine |
| <b>Primary Subject Heading</b>: | Neurology                                                                                                                                                                                                                                                                                                                                                                                                                                                                                                                                                                                |
| Secondary Subject Heading:      | Rehabilitation medicine                                                                                                                                                                                                                                                                                                                                                                                                                                                                                                                                                                  |
| Keywords:                       | tbi, hbot, traumatic brain injury, hyperbaric oxygen, cognitive                                                                                                                                                                                                                                                                                                                                                                                                                                                                                                                          |
|                                 |                                                                                                                                                                                                                                                                                                                                                                                                                                                                                                                                                                                          |

SCHOLARONE™  
Manuscripts

1  
2  
3 **The effect of hyperbaric oxygen therapy on chronic neurocognitive function of** 1  
4  
5 **deficits post traumatic brain injury patients – retrospective analysis** 2

6  
7 Amir Hadanny MD<sup>1,2,3,5</sup>, Stefanie Abbott BA<sup>2</sup>, Gil Suzin MA<sup>2</sup>, Yair Bechor BA<sup>2</sup>, 3

8  
9 Shai Efrati MD<sup>2,4,5,6</sup> 4

10  
11 <sup>1</sup>Neurosurgery department, Galilee Medical Center, Naharyia, Israel 5

12  
13  
14 <sup>2</sup>Sagol Center for Hyperbaric Medicine and Research, Assaf Harofeh Medical Center, 6  
15  
16 Zerifin, Israel 7

17  
18  
19 <sup>3</sup>Galilee Faculty of Medicine, Bar Ilan University, Israel 8

20  
21  
22 <sup>4</sup>Research and Development Unit, Assaf Harofeh Medical Center, 70300 Zerifin, 9  
23  
24 Israel. 10

25  
26  
27 <sup>5</sup>Sackler School of Medicine, Tel-Aviv University, 69978 Tel-Aviv, Israel 11

28  
29  
30 <sup>6</sup>Sagol School of Neuroscience, Tel-Aviv University, 69978 Tel-Aviv, Israel 12

31  
32  
33  
34  
35  
36 *Corresponding author:* 14

37  
38 *Dr. Amir Hadanny,* 15

39  
40 Sagol Center for Hyperbaric Medicine and Research, 16

41  
42 Assaf Harofeh Medical Center, Zerifin, Israel 17

43  
44 T:972-8-9779395 F: 972-8-9542238 18

45  
46 E-mail: [Amir.had@gmail.com](mailto:Amir.had@gmail.com) 19

47  
48  
49  
50  
51  
52  
53  
54 *Author Disclosure Statement* 22



|    |                                                                                                |    |
|----|------------------------------------------------------------------------------------------------|----|
| 1  |                                                                                                |    |
| 2  |                                                                                                |    |
| 3  | No competing financial interests exist.                                                        | 23 |
| 4  |                                                                                                |    |
| 5  |                                                                                                |    |
| 6  | No funding received for this work.                                                             | 24 |
| 7  |                                                                                                |    |
| 8  |                                                                                                |    |
| 9  | No conflict of interests exists.                                                               | 25 |
| 10 |                                                                                                |    |
| 11 |                                                                                                |    |
| 12 | <b><i>Contributorship statement</i></b>                                                        | 26 |
| 13 |                                                                                                |    |
| 14 |                                                                                                |    |
| 15 | AH: concept, data collection, data analysis, manuscript draft, manuscript review               | 27 |
| 16 |                                                                                                |    |
| 17 |                                                                                                |    |
| 18 | SA: data collection, data analysis                                                             | 28 |
| 19 |                                                                                                |    |
| 20 |                                                                                                |    |
| 21 | GS: data collection, manuscript review                                                         | 29 |
| 22 |                                                                                                |    |
| 23 |                                                                                                |    |
| 24 | YB: data collection, manuscript review                                                         | 30 |
| 25 |                                                                                                |    |
| 26 |                                                                                                |    |
| 27 | SE: concept, data analysis, manuscript draft, manuscript review                                | 31 |
| 28 |                                                                                                |    |
| 29 |                                                                                                |    |
| 30 | <b><i>Data sharing statement</i></b>                                                           | 32 |
| 31 |                                                                                                |    |
| 32 |                                                                                                |    |
| 33 | Extra data is available by emailing <a href="mailto:amir.had@gmail.com">amir.had@gmail.com</a> | 33 |
| 34 |                                                                                                |    |
| 35 |                                                                                                | 34 |
| 36 |                                                                                                |    |
| 37 |                                                                                                |    |
| 38 | Running title: HBOT improves cognitive function in TBI                                         | 35 |
| 39 |                                                                                                |    |
| 40 |                                                                                                |    |
| 41 | Number of references: 43                                                                       | 36 |
| 42 |                                                                                                |    |
| 43 | Word count: 3615                                                                               | 37 |
| 44 |                                                                                                |    |
| 45 | Tables: 3                                                                                      | 38 |
| 46 |                                                                                                |    |
| 47 |                                                                                                |    |
| 48 | Figures: 6                                                                                     | 39 |
| 49 |                                                                                                |    |
| 50 |                                                                                                | 40 |
| 51 |                                                                                                |    |
| 52 |                                                                                                | 41 |
| 53 |                                                                                                |    |
| 54 |                                                                                                | 42 |
| 55 |                                                                                                |    |
| 56 |                                                                                                | 43 |
| 57 |                                                                                                |    |
| 58 |                                                                                                |    |
| 59 |                                                                                                |    |
| 60 |                                                                                                |    |

|    |                                                                                         |    |
|----|-----------------------------------------------------------------------------------------|----|
| 1  |                                                                                         |    |
| 2  |                                                                                         |    |
| 3  | <b>Abstract</b>                                                                         | 44 |
| 4  |                                                                                         |    |
| 5  | <i>Objectives</i>                                                                       | 45 |
| 6  |                                                                                         |    |
| 7  | The aim of the study is to evaluate the effect of hyperbaric oxygen therapy (HBOT) in   | 46 |
| 8  | participants suffering from chronic neurological deficits due to traumatic brain injury | 47 |
| 9  | (TBI) of all severities in the largest cohort evaluated so far with objective cognitive | 48 |
| 10 | function tests and metabolic brain imaging.                                             | 49 |
| 11 |                                                                                         |    |
| 12 |                                                                                         |    |
| 13 |                                                                                         |    |
| 14 |                                                                                         |    |
| 15 | <i>Methods</i>                                                                          | 50 |
| 16 |                                                                                         |    |
| 17 | A retrospective analysis was conducted of 154 patients suffering from chronic           | 51 |
| 18 | neurocognitive damage due to TBI, who had undergone computerized cognitive              | 52 |
| 19 | evaluations pre- and post-HBOT treatment.                                               | 53 |
| 20 |                                                                                         |    |
| 21 |                                                                                         |    |
| 22 |                                                                                         |    |
| 23 |                                                                                         |    |
| 24 | <i>Results</i>                                                                          | 54 |
| 25 |                                                                                         |    |
| 26 | The average age was 42.7±14.6 years and 58.4% were males. All patients had              | 55 |
| 27 | documented traumatic brain injury 0.3-33 years (mean 4.6±5.8, median 2.75 years)        | 56 |
| 28 | prior to HBOT. HBOT induced significant improvement in all of the cognitive             | 57 |
| 29 | domains, with mean change in global cognitive scores of 4.6±8.5 (p<0.00001). The        | 58 |
| 30 | most prominent improvements were in memory index and attention, with mean               | 59 |
| 31 | changes of 8.1±16.9 (p<0.00001) and 6.8±16.5 (p<0.0001), respectively. The most         | 60 |
| 32 | striking changes observed in brain single photon emission computed tomography           | 61 |
| 33 | (SPECT) images were in the anterior cingulate and the post-central cortex, in the       | 62 |
| 34 | prefrontal areas and in the temporal areas.                                             | 63 |
| 35 |                                                                                         |    |
| 36 |                                                                                         |    |
| 37 |                                                                                         |    |
| 38 |                                                                                         |    |
| 39 |                                                                                         |    |
| 40 |                                                                                         |    |
| 41 |                                                                                         |    |
| 42 |                                                                                         |    |
| 43 |                                                                                         |    |
| 44 |                                                                                         |    |
| 45 |                                                                                         |    |
| 46 |                                                                                         |    |
| 47 | <i>Conclusions</i>                                                                      | 64 |
| 48 |                                                                                         |    |
| 49 |                                                                                         |    |
| 50 | In the largest published cohort of patients suffering from chronic deficits post TBI of | 65 |
| 51 | all severities, HBOT induced significant cognitive improvements. The clinical           | 66 |
| 52 | improvements were well correlated with increased activity in the relevant brain areas.  | 67 |
| 53 |                                                                                         |    |
| 54 |                                                                                         |    |
| 55 |                                                                                         |    |
| 56 |                                                                                         |    |
| 57 |                                                                                         |    |
| 58 |                                                                                         |    |
| 59 |                                                                                         |    |
| 60 |                                                                                         |    |

|    |                                                                                  |    |
|----|----------------------------------------------------------------------------------|----|
| 1  |                                                                                  |    |
| 2  |                                                                                  |    |
| 3  |                                                                                  | 68 |
| 4  |                                                                                  |    |
| 5  | Keywords: hyperbaric oxygen, HBOT, post-concussion, PCS, TBI, traumatic brain    | 69 |
| 6  |                                                                                  |    |
| 7  | injury                                                                           | 70 |
| 8  |                                                                                  |    |
| 9  | <b>Article Summary</b>                                                           | 71 |
| 10 |                                                                                  |    |
| 11 |                                                                                  |    |
| 12 | <i>Strengths and limitations of the study</i>                                    | 72 |
| 13 |                                                                                  |    |
| 14 |                                                                                  |    |
| 15 | • The major limitation relates to its retrospective methodology, however this    | 73 |
| 16 |                                                                                  |    |
| 17 | limitation is diminished by the fact that all patients of the study large cohort | 74 |
| 18 |                                                                                  |    |
| 19 | were treated at late chronic stages.                                             | 75 |
| 20 |                                                                                  |    |
| 21 |                                                                                  |    |
| 22 | • In regards to strengths, objective cognitive assessments using computerized    | 76 |
| 23 |                                                                                  |    |
| 24 | tests (which are superior to any clinical questionnaire), were performed on      | 77 |
| 25 |                                                                                  |    |
| 26 | each patient both pre- and post-treatment.                                       | 78 |
| 27 |                                                                                  |    |
| 28 |                                                                                  |    |
| 29 | • The study cohort consisted of a civilian population that does not have any     | 79 |
| 30 |                                                                                  |    |
| 31 | potential secondary gain (such as financial compensation by reporting sick).     | 80 |
| 32 |                                                                                  |    |
| 33 |                                                                                  | 81 |
| 34 |                                                                                  |    |
| 35 |                                                                                  |    |
| 36 |                                                                                  |    |
| 37 |                                                                                  |    |
| 38 |                                                                                  |    |
| 39 |                                                                                  |    |
| 40 |                                                                                  |    |
| 41 |                                                                                  |    |
| 42 |                                                                                  |    |
| 43 |                                                                                  |    |
| 44 |                                                                                  |    |
| 45 |                                                                                  |    |
| 46 |                                                                                  |    |
| 47 |                                                                                  |    |
| 48 |                                                                                  |    |
| 49 |                                                                                  |    |
| 50 |                                                                                  |    |
| 51 |                                                                                  |    |
| 52 |                                                                                  |    |
| 53 |                                                                                  |    |
| 54 |                                                                                  |    |
| 55 |                                                                                  |    |
| 56 |                                                                                  |    |
| 57 |                                                                                  |    |
| 58 |                                                                                  |    |
| 59 |                                                                                  |    |
| 60 |                                                                                  |    |

|    |                                                                                          |     |
|----|------------------------------------------------------------------------------------------|-----|
| 1  |                                                                                          |     |
| 2  |                                                                                          |     |
| 3  | <b><i>Introduction</i></b>                                                               | 82  |
| 4  |                                                                                          |     |
| 5  |                                                                                          |     |
| 6  | Traumatic brain injury (TBI) is one of the leading causes of death and disability in the | 83  |
| 7  | general population.(1) Following TBI, patients may experience a set of symptoms          | 84  |
| 8  | known as post-concussion syndrome (PCS). PCS symptoms include headaches,                 | 85  |
| 9  | dizziness, neuropsychiatric symptoms, and cognitive impairments.(2) PCS can              | 86  |
| 10 | continue for weeks or months, and up to 25% of all patients experience prolonged         | 87  |
| 11 | PCS (PPCS) in which the symptoms last for over six months.(3)                            | 88  |
| 12 |                                                                                          |     |
| 13 |                                                                                          |     |
| 14 | In the past years there is growing clinical evidence regarding the effect of hyperbaric  | 89  |
| 15 | oxygen therapy (HBOT) on PCS.(4, 5) Unfortunately, the clinical data gathered from       | 90  |
| 16 | those studies can be conflicting due to several inherent procedural issues, such as the  | 91  |
| 17 | use of non-objective end points, the lack of appropriate brain imaging as part of the    | 92  |
| 18 | inclusion criteria, the inappropriate placebo of a hyperbaric environment, and the       | 93  |
| 19 | inclusion of patients that may gain secondary benefits from reporting sick.(4, 5) The    | 94  |
| 20 | current study represents the largest cohort evaluated until now of civilian participants | 95  |
| 21 | suffering from PCS treated by HBOT, who had undergone objective metabolic brain          | 96  |
| 22 | imaging and a computerized neurocognitive test battery before and after the treatment.   | 97  |
| 23 |                                                                                          |     |
| 24 |                                                                                          |     |
| 25 |                                                                                          |     |
| 26 |                                                                                          |     |
| 27 |                                                                                          |     |
| 28 |                                                                                          |     |
| 29 |                                                                                          |     |
| 30 |                                                                                          |     |
| 31 |                                                                                          |     |
| 32 |                                                                                          |     |
| 33 |                                                                                          |     |
| 34 |                                                                                          |     |
| 35 |                                                                                          |     |
| 36 |                                                                                          |     |
| 37 |                                                                                          |     |
| 38 |                                                                                          |     |
| 39 |                                                                                          |     |
| 40 | <b><i>Pathophysiology of PCS and HBOT</i></b>                                            | 98  |
| 41 |                                                                                          |     |
| 42 | The most common pathological mechanism in TBI is diffuse shearing of axonal              | 99  |
| 43 | pathways and small blood vessels, also known as diffuse axonal injury.(6) Secondary      | 100 |
| 44 | pathological mechanisms of TBI include ischemia, mild edema, and other                   | 101 |
| 45 | biochemical and inflammatory processes culminating in impaired regenerative and/or       | 102 |
| 46 | healing processes resulting from increasing tissue hypoxia.(7) Due to the diffuse        | 103 |
| 47 | nature of injury, affecting multiple brain areas,(8, 9) cognitive impairments are        | 104 |
| 48 | usually the predominant symptoms.                                                        | 105 |
| 49 |                                                                                          |     |
| 50 |                                                                                          |     |
| 51 |                                                                                          |     |
| 52 |                                                                                          |     |
| 53 |                                                                                          |     |
| 54 |                                                                                          |     |
| 55 |                                                                                          |     |
| 56 |                                                                                          |     |
| 57 |                                                                                          |     |
| 58 |                                                                                          |     |
| 59 |                                                                                          |     |
| 60 |                                                                                          |     |

1  
2  
3 Global brain hypoperfusion, and its related tissue ischemia, detected in patients 106  
4 suffering from TBI, serves as a rate-limiting factor for any regenerative process.(10- 107  
5  
6  
7 12) By increasing the oxygen level in blood and body tissues, HBOT can augment the 108  
8  
9 repair mechanisms.(13) Various models have strongly suggested that HBOT can 109  
10 induce angiogenesis, improve brain plasticity, enhance neurogenesis and 110  
11  
12 synaptogenesis and foster functional recovery.(14, 15) 111  
13  
14  
15

### 16 *Conflicting clinical HBOT data and objective measurements in PCS* 112

17  
18  
19 Some of the previous studies which evaluated the effect of HBOT on chronic 113  
20 neurological and cognitive impairments due to TBI, mainly used self-assessment 114  
21 questionnaires as their primary endpoints.(16-18) Such endpoints have several 115  
22 inherent disadvantages. First, they lack an objective evaluation that is not biased by 116  
23 the patients' perspectives. Second, self-administrated questionnaires are exposed to 117  
24 various confounding variables such as litigation and compensation.(19). Unlike the 118  
25 questionnaires, standardized cognitive tests with high test-retest reliability can and 119  
26 should be used as objective evaluations of neurocognitive impairments.(20) In 120  
27 addition, novel brain imaging techniques such as single photon emission computed 121  
28 tomography (SPECT) and perfusion sequences in magnetic resonance imaging (MRI), 122  
29 which evaluate cerebral blood flow and brain metabolism, can shed new light in PCS 123  
30 diagnosis and in evaluating therapeutic interventions.(20) In clinical studies which 124  
31 utilized objective cognitive assessments, HBOT was found to induce significant 125  
32 improvements in patients suffering from PCS due to mild TBI. (13, 15, 21) However, 126  
33 to the best of our knowledge, the objective effect of HBOT on chronic neurocognitive 127  
34 impairments stemming from moderate to severe TBI (in addition to mild) has not been 128  
35 investigated. 129  
36  
37  
38  
39  
40  
41  
42  
43  
44  
45  
46  
47  
48  
49  
50  
51  
52  
53  
54  
55  
56  
57  
58  
59  
60

1  
2  
3 In addition to objective evaluations, there are inherent ethical and logistic difficulties 130  
4 in handling the sham control in HBOT trials.(4, 5, 20, 22) HBOT includes two active 131  
5 ingredients: pressure and oxygen. Pressure is needed to increase plasma oxygen, but 132  
6 the pressure change alone may also have significant cellular effects.(5) Additionally, 133  
7 the greatest effect of pressure is in human tissues that are under tight autoregulation 134  
8 pressure control, such as the brain, where the intracranial pressure is normally 0.0092- 135  
9 0.0197atm.(23, 24) To generate a pressure sensation, the chamber pressure must be 136  
10 1.2ATA or higher. However, such a change in environmental pressure (from 1ATA 137  
11 to 1.2 ATA) and subsequent tissue oxygenation (with an increase of tissue 138  
12 oxygenation by at least 50%) has a significant biologic effect (25, 26) Thus, sham 139  
13 therapy in previous studies using 1.2 ATA on 21% inhaled oxygen (i.e., air) cannot be 140  
14 regarded as an inert or sham control but rather as a lower dose of the active 141  
15 ingredient.(4, 20) In regards to a possible effect of vasoconstriction of the large blood 142  
16 vessels induced by hyperbaric oxygen - it has been well established that the tissues 143  
17 are saturated by hyperoxia and do not suffer from hypoxia, as the vasoconstriction 144  
18 effect is compensated by increased plasma oxygen content and microvascular blood 145  
19 flow. (27) 146

20  
21  
22 Any increase in pressure, even with reduced oxygen percentage, cannot serve as a true 147  
23 placebo, but rather as a low dosage of the active ingredient, further supporting the 148  
24 need for objective data gathered from large cohorts of patients suffering from PCS 149  
25 and treated by HBOT. 150

26  
27  
28 The aim of the current study was to evaluate the objective effects of HBOT on TBI 151  
29 patients suffering from chronic neurological deficits stemming from mild, moderate, 152  
30 and severe TBI, in the largest cohort evaluated until now. Since all the patients had 153  
31 metabolic brain imaging and a computerized neurocognitive test battery before and 154

1  
2  
3 after HBOT, correlations between specific cognitive indexes and their related brain 155  
4  
5 regions activity were also evaluated. 156  
6  
7  
8  
9

157

10  
11  
12  
13  
14  
15  
16  
17  
18  
19  
20  
21  
22  
23  
24  
25  
26  
27  
28  
29  
30  
31  
32  
33  
34  
35  
36  
37  
38  
39  
40  
41  
42  
43  
44  
45  
46  
47  
48  
49  
50  
51  
52  
53  
54  
55  
56  
57  
58  
59  
60

For peer review only

|    |                                                                                       |     |
|----|---------------------------------------------------------------------------------------|-----|
| 1  |                                                                                       |     |
| 2  |                                                                                       |     |
| 3  | <b><i>Materials and Methods</i></b>                                                   | 158 |
| 4  |                                                                                       |     |
| 5  |                                                                                       |     |
| 6  | <i>Participants</i>                                                                   | 159 |
| 7  |                                                                                       |     |
| 8  | A retrospective analysis was conducted on patients suffering from TBI-related chronic | 160 |
| 9  | neurocognitive damage (more than 3 months from injury), treated by HBOT between       | 161 |
| 10 | January 2008 and January 2017 at the Sagol Center for Hyperbaric Medicine and         | 162 |
| 11 | Research, Assaf Harofeh Medical Center, Israel. Patients were included if they had    | 163 |
| 12 | pre- and post-HBOT computerized cognitive evaluations. Patients with a history of     | 164 |
| 13 | potential additional brain insults, such as spontaneous subarachnoid hemorrhage,      | 165 |
| 14 | anoxic brain injury, or history of prior cognitive impairment, were excluded (Figure- | 166 |
| 15 | 1).                                                                                   | 167 |
| 16 |                                                                                       |     |
| 17 | The study was approved by the Institutional Review Board of Asaf Harfoeh Medical      | 168 |
| 18 | Center.                                                                               | 169 |
| 19 |                                                                                       |     |
| 20 | <i>Patients and public involvement</i>                                                | 170 |
| 21 |                                                                                       |     |
| 22 | Patients and public weren't involved in the study due to its retrospective nature.    | 171 |
| 23 |                                                                                       |     |
| 24 | <i>TBI severity</i>                                                                   | 172 |
| 25 |                                                                                       |     |
| 26 | TBI severities were rated according to the TBI admission documents. Mild TBI was      | 173 |
| 27 | defined as loss of consciousness (LOC) with duration of 0–30 minutes, post traumatic  | 174 |
| 28 | amnesia (PTA) with duration of less than a day and a Glasgow coma scale (GCS)         | 175 |
| 29 | grade of 13–15. (28) Moderate TBI was defined as LOC with duration of more than       | 176 |
| 30 | 30 minutes and up to 24 hours, PTA with duration of 1-7 days and GCS grade of 9-      | 177 |
| 31 | 12. Severe TBI was defined as LOC with duration of more than 24 hours, PTA with       | 178 |
| 32 | duration of more than seven days, and GCS less than 9. In addition, if there was      | 179 |
| 33 | imaging evidence of an injury such as a hematoma, contusion or hemorrhage, then the   | 180 |
| 34 | TBI was classified as moderate to severe. (28)                                        | 181 |
| 35 |                                                                                       |     |
| 36 | <i>Hyperbaric oxygen treatment</i>                                                    | 182 |
| 37 |                                                                                       |     |
| 38 |                                                                                       |     |
| 39 |                                                                                       |     |
| 40 |                                                                                       |     |
| 41 |                                                                                       |     |
| 42 |                                                                                       |     |
| 43 |                                                                                       |     |
| 44 |                                                                                       |     |
| 45 |                                                                                       |     |
| 46 |                                                                                       |     |
| 47 |                                                                                       |     |
| 48 |                                                                                       |     |
| 49 |                                                                                       |     |
| 50 |                                                                                       |     |
| 51 |                                                                                       |     |
| 52 |                                                                                       |     |
| 53 |                                                                                       |     |
| 54 |                                                                                       |     |
| 55 |                                                                                       |     |
| 56 |                                                                                       |     |
| 57 |                                                                                       |     |
| 58 |                                                                                       |     |
| 59 |                                                                                       |     |
| 60 |                                                                                       |     |



1  
2  
3 Patients were treated with 40-70 daily hyperbaric sessions, 5 days a week. Each 183  
4 session consisted of 60 minutes of exposure to 100% oxygen at 1.5-2 ATA. 184

5  
6  
7 *Cognitive assessment* 185

8  
9  
10 The patients' cognitive functions were assessed by NeuroTrax computerized cognitive 186  
11 tests (NeuroTrax Corp., NY).(29) The NeuroTrax tests evaluate various aspects of 187  
12 brain functions and include verbal memory (immediate and delayed recognition), non- 188  
13 verbal memory (immediate and delayed recognition), go/no go response inhibition, 189  
14 problem solving, Stroop interference, finger tapping, catch game, staged information 190  
15 processing speed (single digit, two-digit and three-digit arithmetic), verbal function 191  
16 and visual spatial processing. Cognitive index scores were computed from the 192  
17 normalized outcome parameters for memory, executive function, attention, 193  
18 information processing speed, visual spatial, verbal function and motor skills 194  
19 domains.(30) A global cognitive score was computed as the average of all index 195  
20 scores for each individual. 196

21  
22  
23 After administration, the NeuroTrax data were uploaded to the NeuroTrax central 197  
24 server, and outcome parameters were automatically calculated using software blind to 198  
25 diagnosis or testing site. To account for the well-known effects of age and education 199  
26 on cognitive performance, each outcome parameter was normalized and fit to an IQ- 200  
27 like scale (mean=100, S.D.=15) according to the patient's age and education. The 201  
28 normative data used by NeuroTrax consist of test data from cognitively healthy 202  
29 individuals in controlled research studies at more than 10 sites. (31) 203

30  
31  
32 Specifically, the patients were given two different versions of the NeuroTrax test 204  
33 battery before and after HBOT, to allow repeated administrations with minimal 205  
34 learning effects. Test-retest reliability for these versions was evaluated and found to 206

1  
2  
3 be high, with no significant learning effect.(32, 33) Regarding the current study 207  
4 cohort, in a previous randomized controlled trial in patients suffering from TBI, the 208  
5 NeuroTrax scores were found to be stable in the retest of the control group.(21) 209  
6  
7  
8  
9

### 10 *Brain SPECT imaging* 210

11  
12 Brain activity was assessed using single photon emission computed tomography 211  
13 (SPECT) 1-2 weeks prior to and after the HBOT period. The SPECT method was 212  
14 selected for evaluation due to its known normal range and test/retest established 213  
15 validity. The imaging was conducted using 925–1,110 MBq (25–30 mCi) of a 214  
16 technetium-99-methyl-cysteinate-dimer (Tc-99m-ECD) at 40–60 min post injection, 215  
17 using a dual detector gamma camera (ECAM or Symbia T, Siemens Medical 216  
18 Systems) equipped with high resolution collimators. Data was acquired in 3-degree 217  
19 steps and reconstructed iteratively using the Chang method of attenuation correction 218  
20 ( $\mu = 0.12/\text{cm}$ ). (34) 219  
21  
22  
23  
24  
25  
26  
27  
28  
29  
30  
31  
32

33 Both pre- and post-treatment SPECT images were normalized to the median maximal 220  
34 brain activity in the entire brain, and were then reoriented into Talairach space using 221  
35 NeuroGam software (Segami Corporation) to identify Brodmann cortical areas and to 222  
36 compute the mean perfusion in each Brodmann area (BA). In addition, volume- 223  
37 rendered brain perfusion images were reconstructed and normalized to the entire brain 224  
38 median maximal activity. All SPECT analyses were done by study team members 225  
39 who were blinded to the laboratory and clinical data. SPECT scans were performed 226  
40 late morning to midday. On the day of the SPECT scan, patients were treated with 227  
41 only their chronic medications and were instructed not to smoke. Changes in 228  
42 perfusion in all Brodmann areas for each subject were determined by calculating the 229  
43  
44  
45  
46  
47  
48  
49  
50  
51  
52  
53  
54  
55  
56  
57  
58  
59  
60

1  
2  
3 percentage of the difference of the normalized activity values between post-treatment 230  
4 and pre-treatment divided by the pre-treatment value. 231  
5  
6

7  
8 *Statistical Analysis* 232  
9

10 Continuous data were expressed as means  $\pm$  standard deviations. The normal 233  
11 distribution for all variables was tested using the Kolmogorov-Smirnov test. The 234  
12 mean differences between cognitive index scores before and after HBOT were 235  
13 analyzed using one-way ANOVA with post-hoc Bonferroni tests. Multiple linear 236  
14 regression models and multivariate logistic regression models were performed to 237  
15 control for potential confounders and to determine independent predictors for clinical 238  
16 outcome. The alpha level was set to 0.05. Data were statistically analyzed using SPSS 239  
17 software (version 22.0). 240  
18  
19  
20  
21  
22  
23  
24  
25  
26  
27  
28  
29  
30  
31  
32  
33  
34  
35  
36  
37  
38  
39  
40  
41  
42  
43  
44  
45  
46  
47  
48  
49  
50  
51  
52  
53  
54  
55  
56  
57  
58  
59  
60

251

252

253

254

255

256

**Results**

257

*Patient profiles*

258

Of the 242 patients suffering from neurocognitive impairment due to TBI treated by HBOT between January 2008 and January 2017, 25 patients had potential additional brain insults and 63 did not have repeat computerized neurocognitive evaluations. Therefore, 154 patients were included in the final analysis, of whom 100 patients completed pre- and post-HBOT SPECT imaging (Figure-1).

The patients' baseline characteristics are summarized in Table 1. The average age was 42.7±14.6 years and 58.4% were males. All patients had documented traumatic brain injury 3 months to 33 years (mean 4.6±5.8, median 2.75 years) prior to HBOT. Sixty-nine (44.8%) had neurocognitive impairments due to mild TBI, 24 (15.6%) moderate TBI and 61 (39.6%) severe TBI. Most of the patients (86.2%) complained of cognitive impairment as their main symptom (Table 1).

Patients were treated with 40-70 (mean 52.0±9.9) sessions of hyperbaric oxygen at 1.5-2 ATA. 18 (12%) patients reported adverse events, which included mild barotrauma of the ears and palpitations/dyspnea, while in the chamber.

1  
2  
3 *Severity of TBI* 273  
4

5  
6 In our cohort, patients who suffered severe TBI were found to be younger with higher 274  
7 proportion of males than in the mild and moderate TBI groups ( $P<0.0001$ ,  $P=0.002$  275  
8 respectively, Table 1). As expected, the severe TBI group had significantly higher 276  
9 proportions of cognitive impairment and motor deficits ( $p=0.004$  and  $p<0.0001$  277  
10 respectively, Table 1). The mild and moderate TBI groups had higher percentages of 278  
11 tinnitus and/or dizziness ( $p<0.0001$ ,  $p=0.002$  respectively, Table 1). 279

12  
13  
14  
15  
16  
17  
18 *Severe TBI* 280  
19

20  
21 Sixty-one patients had severe TBI. The main imaging findings at their admission are 281  
22 summarized in Figure-2. Of those 61 patients, 36 (59%) had surgical intervention 282  
23 during the acute event. 283  
24  
25  
26

27  
28  
29  
30 *Neurocognitive evaluation* 285  
31

32  
33 The effect of HBOT on the patients' cognitive functions, as assessed by the eight 286  
34 cognitive summary scores, is summarized in Table 2 and Figure-3. As can be seen, 287  
35 HBOT induced significant improvements in all of the cognitive domains with a mean 288  
36 change of  $4.6\pm 8.5$  ( $p<0.00001$ ). The most prominent improvement was in the memory 289  
37 index, with  $8.1\pm 16.9$  ( $p<0.00001$ ), and in attention, with  $6.8\pm 16.5$  ( $p<0.0001$ ) (Table 290  
38 2, Figure-3). 291  
39  
40  
41  
42  
43  
44

45  
46 The mild TBI group had the largest improvement in attention ( $8.8\pm 2.1$ ), followed by 292  
47 memory ( $7.9\pm 2.3$ ). Patients in the moderate TBI group had noticeable improvements 293  
48 in memory ( $11.1\pm 3.1$ ), followed by information processing speed ( $6.6\pm 3.5$ ). Lastly, 294  
49 the severe TBI group had the largest improvement in memory ( $7.0\pm 2.0$ ), followed by 295  
50 attention ( $6.3\pm 1.9$ ) (Figure-4). Using ANOVA analysis for repeated measures, there 296  
51  
52  
53  
54  
55  
56  
57  
58  
59  
60

1  
2  
3 were no significant differences in all cognitive domains improvements between the 297  
4 different TBI severity groups. 298  
5  
6

7  
8 The magnitude of the change in a cognitive score has different implications for 299  
9 patients at low or high baseline levels. Therefore, we further inspected the effect of 300  
10 HBOT on the relative changes, i.e., the changes relative to the baseline value, in each 301  
11 of the cognitive measured indexes. Marked improvements defined as >10% increase 302  
12 compared to baseline cognitive index were found, with different percentages, in all 303  
13 three study groups as summarized in Table 3. 304  
14  
15  
16  
17  
18  
19  
20  
21  
22

### 23 *Confounders* 306

24  
25 Relative change higher than 10% from baseline was considered a significant clinical 307  
26 improvement. Age, gender, education level, TBI severity, the time from injury to 308  
27 HBOT, HBOT protocol and number of sessions had no significant effect on the 309  
30 clinical improvement in the general, memory, attention, information processing speed 310  
31 and executive functions domains ( $p>0.05$ ). 311  
32  
33  
34  
35  
36  
37

### 38 *Metabolic imaging of the brain using SPECT* 313

39  
40  
41 One hundred patients had brain SPECT evaluations before and after HBOT. When 314  
42 calculating the mean relative change in each cortical Brodmann area for the entire 315  
43 cohort, the largest changes were in the anterior temporal tip areas (BA 38, BA 28, BA 316  
44 20) and in the prefrontal cortex (BA 10) (Figure-5). However, these changes were 317  
45 minor, in the range of 3-4% relative change. Further analysis per TBI severity group 318  
46 revealed several differences in Brodmann areas with involvement of the perirhinal 319  
47 cortex (BA 36) and the primary visual cortex (BA 18), as seen in Figure-6. 320  
48  
49  
50  
51  
52  
53  
54  
55  
56  
57  
58  
59  
60

1  
2  
3 To correlate SPECT imaging and cognitive changes, analysis was performed on the 321  
4 top twenty patients who had the largest cognitive improvement (>10% relative 322  
5 increase from baseline). There was a significantly larger magnitude of metabolism 323  
6 increase (5-8%), compared to the entire cohort average increase (2-4%) ( $p<0.05$ ). The 324  
7 most striking changes were found in the anterior cingulate (BA 24, ( $p=0.01$ )) and the 325  
8 post-central cortex (BA 5, ( $p=0.04$ )), in the prefrontal areas (BA 10 ( $p=0.04$ ), BA 11 326  
9 ( $p=0.07$ ), BA 46 ( $p=0.07$ ) and in the temporal areas (BA 20 ( $p=0.02$ ), BA 38 327  
10 ( $p=0.07$ ), BA 36 ( $p=0.1$ )). 328

### 27 ***Discussion*** 332

28  
29  
30 The present study demonstrates the neurotherapeutic effects of HBOT for chronic TBI 333  
31 of all severities. Even though treatment started during late chronic stages (mean 334  
32 4.6±5.8 years, median 2.75 years) after the acute insult, HBOT was still found to be 335  
33 effective regardless of the TBI severity. The clinical improvements seen in all 336  
34 cognitive domains were well documented by objective computerized neurocognitive 337  
35 tests. The most significant measurable improvements were in memory, attention and 338  
36 executive function. We found the clinical improvement to be well correlated with 339  
37 increased brain activity in relevant brain areas, with significantly higher increases in 340  
38 patients with better cognitive improvements. 341

39  
40  
41 In addition to tissue oxygenation, numerous mechanisms of cellular and vascular 342  
42 repair by HBOT have been suggested in addition to tissue oxygenation.(5) These 343  
43 include improved mitochondrial function and cellular metabolism, improved blood- 344  
44  
45  
46  
47  
48  
49  
50  
51  
52  
53  
54  
55  
56  
57  
58  
59  
60

1  
2  
3 brain barrier and inflammatory reactions, reduced apoptosis, alleviation of oxidative 345  
4 stress, increased levels of neurotrophins and nitric oxide, and upregulation of axonal 346  
5 guidance agents.(5, 13, 35) Moreover, the effects of HBOT on neurons can be 347  
6 mediated indirectly by glial cells. HBOT may also promote neurogenesis of 348  
7 endogenous neural stem cells.(13, 35) The common denominator underlying all these 349  
8 mechanisms is that they are oxygen-dependent. HBOT may enable the metabolic 350  
9 change simply by supplying the missing energy/oxygen needed for these regeneration 351  
10 processes. (35) The induction of angiogenesis and improved brain metabolism, as 352  
11 demonstrated in this study, may serve as the infrastructure that enables the 353  
12 regenerative process and the preservation of newly generated neuronal functioning. 354  
13 (14, 36) 355

14  
15  
16  
17  
18  
19  
20  
21  
22  
23  
24  
25  
26  
27  
28  
29 The correlation between specific cognitive function improvements with the metabolic 357  
30 brain imaging changes gives further strength to the study results and serves as an 358  
31 excellent tool for gaining better understanding of brain functionality (Figure-6): 359

- 32  
33  
34  
35  
36  
37 • The perirhinal cortex activation after HBOT was most prominent in 360  
38 patients who had significant memory improvement. The perirhinal 361  
39 cortex has a critical role in object recognition memory while 362  
40 interacting with the hippocampus.(37) Since the memory assessments 363  
41 in the cognitive tests were indeed recognition tasks, this area is 364  
42 expected to be involved. 365
- 43  
44  
45  
46  
47  
48  
49  
50 • The pre-frontal cortex (BA 10, BA 11) and more specifically, the 366  
51 inferior frontal gyrus (BA 46, BA 47) activations after HBOT were 367  
52 prominent in all patients with significant executive function 368  
53 improvements. The right frontal gyrus is known to mediate a go/no go 369



1  
2  
3 task, (38) which was among the executive function tests used in the 370  
4  
5 present study. The prefrontal gyrus is presumed to act as a filtering 371  
6  
7 system that enhances goal directed activities and inhibits irrelevant 372  
8  
9 activations. This filtering mechanism enables executive control.(39) 373  
10  
11 • The anterior cingulate gyrus (BA 24) activation after HBOT was seen 374  
12  
13 in the subjects with attention improvement. The anterior cingulate 375  
14  
15 gyrus is presumed to be involved in error detection, especially in a 376  
16  
17 Stroop task,(40) which was used in the attention tests. Lesions in this 377  
18  
19 area can cause inattention to akinetic mutism.(40) 378  
20  
21  
22  
23  
24

25 This study has several limitations. The major one relates to its retrospective 380  
26  
27 methodology. This limitation is diminished when considering that this large cohort of 381  
28  
29 patients was treated at late chronic stages. The findings presented here are in 382  
30  
31 agreement and reinforce the findings from previous prospective controlled trials in 383  
32  
33 which the neuroplasticity effects of HBOT were demonstrated in chronic stages of 384  
34  
35 different types of brain injuries.(15, 21, 41, 42) Moreover, the correlation between the 385  
36  
37 changes in cognitive function and the metabolic brain imaging gives further strength 386  
38  
39 to the results. 387  
40  
41

42 Another important limitation relates to the HBOT protocol which was inconsistent 388  
43  
44 across the cohort. Although significant neurotherapeutic effects were seen with 60 389  
45  
46 minutes of 1.5 ATA, the optimal protocol needed to induce maximal neuroplasticity 390  
47  
48 for the specific individual, with minimal side effects has not been investigated. 391  
49  
50

51  
52  
53 The strengths of the study are worth mentioning. First, objective cognitive 393  
54  
55 assessments using computerized tests were performed on each patient both pre- and 394  
56  
57  
58  
59  
60

1  
2  
3 post-treatment. Objective measures are significantly superior to PCS questionnaires 395  
4  
5 which are inaccurate, variable and contain various confounders rather than reflect the 396  
6  
7 true PCS state.(43) Second, most of the patients in the study underwent an objective 397  
8  
9 ancillary brain SPECT to confirm PCS diagnosis prior to HBOT. This practice is 398  
10  
11 crucial when considering the differential diagnosis following TBI (PTSD, depression, 399  
12  
13 etc.). 400  
14

15  
16 Moreover, post-treatment brain SPECTs revealed an anatomical-functional 401  
17  
18 correlation in regards to HBOT's effect in brain neuroplasticity. Third, the study 402  
19  
20 cohort consisted of a civilian population that does not have any potential secondary 403  
21  
22 gain (such as financial compensation) by reporting sick. 404  
23

24 405  
25  
26 Previous studies included post-concussion syndrome patients who suffered mild TBI 406  
27  
28 injury. Considering its strengths and limitations, the current study implies that the 407  
29  
30 cognitive function of patients post TBI, can be improved significantly, irrespectively 408  
31  
32 of whether the primary brain injury was classified as mild, moderate or severe. 409  
33

34  
35 Although long term data is still lacking, considering the high safety profile of the 410  
36  
37 treatment, these results are promising and should encourage rehabilitation centers to 411  
38  
39 consider HBOT for patients with chronic neurocognitive deficits following TBI. 412  
40

41  
42 Future studies should monitor these patients in the long term (6 months, 12 months) 413  
43  
44 as well as their return to activities of daily living. 414  
45

46 **Conclusions** 415  
47

48 HBOT induced significant cognitive improvements in patients who suffer from 416  
49  
50 chronic neurocognitive deficits due to mild, moderate and severe TBI. Improvement 417  
51  
52 in memory correlated with activation of the perirhinal cortex, improvement of 418  
53  
54

1  
2  
3 executive functions correlated with activation of the inferior frontal gyrus, and 419  
4  
5 improvement in attention correlated with activation of the anterior cingulate gyrus. 420  
6  
7  
8  
9

421

422

423

424

425

426

427

428

429

430

431

432

433

434

435

436

437

## References

438

1. Coronado VG, Xu L, Basavaraju SV, McGuire LC, Wald MM, Faul MD, et al. Surveillance for traumatic brain injury-related deaths--United States, 1997-2007. *MMWR Surveill Summ.* 2011;60(5):1-32. Epub 2011/05/06. PubMed PMID: 21544045. 439-441
2. Bazarian JJ, Wong T, Harris M, Leahey N, Mookerjee S, Dombovy M. Epidemiology and predictors of post-concussive syndrome after minor head injury in an emergency population. *Brain injury : [BI].* 1999;13(3):173-89. PubMed PMID: 10081599. 442-444
3. Kashluba S, Paniak C, Blake T, Reynolds S, Toller-Lobe G, Nagy J. A longitudinal, controlled study of patient complaints following treated mild traumatic brain injury. *Archives of clinical neuropsychology : the official journal of the National Academy of Neuropsychologists.* 2004;19(6):805-16. doi: 10.1016/j.acn.2003.09.005. PubMed PMID: 15288333. 445-449
4. Figueroa XA, Wright JK. Hyperbaric oxygen: B-level evidence in mild traumatic brain injury clinical trials. *Neurology.* 2016;87(13):1400-6. Epub 2016/09/02. doi: 10.1212/WNL.0000000000003146. PubMed PMID: 27581219. 450-452
5. Efrati S, Ben-Jacob E. Reflections on the neurotherapeutic effects of hyperbaric oxygen. *Expert review of neurotherapeutics.* 2014;14(3):233-6. doi: 10.1586/14737175.2014.884928. PubMed PMID: 24471697. 453-455
6. Medana IM, Esiri MM. Axonal damage: a key predictor of outcome in human CNS diseases. *Brain.* 2003;126(Pt 3):515-30. Epub 2003/02/05. PubMed PMID: 12566274. 456-457
7. Kochanek PM, Clark, R.S.B., & Jenkins, L.W. TBI :Pathobiology. In: Zasler ND, Katz, D.I., Zafonte, R.D., editor. *Brain injury medicine.* NY: Demos medical publishing; 2007. p. 81-92. 458-460
8. Kushner D. Mild traumatic brain injury: toward understanding manifestations and treatment. *Arch Intern Med.* 1998;158(15):1617-24. Epub 1998/08/13. PubMed PMID: 9701095. 461-463
9. Sohlberg MM, Mateer CA. *Cognitive Rehabilitation: An Integrative Neuropsychological Approach.* NY: The Guilford Press; 2001. 464-465
10. Kim J, Whyte J, Patel S, Avants B, Europa E, Wang J, et al. Resting cerebral blood flow alterations in chronic traumatic brain injury: an arterial spin labeling perfusion fMRI study. *Journal of neurotrauma.* 2010;27(8):1399-411. doi: 10.1089/neu.2009.1215. PubMed PMID: 20528163; PubMed Central PMCID: PMC2967826. 466-469
11. Ostergaard L, Engedal TS, Aamand R, Mikkelsen R, Iversen NK, Anzabi M, et al. Capillary transit time heterogeneity and flow-metabolism coupling after traumatic brain injury. *Journal of cerebral blood flow and metabolism : official journal of the International Society of Cerebral Blood Flow and Metabolism.* 2014;34(10):1585-98. doi: 10.1038/jcbfm.2014.131. PubMed PMID: 25052556; PubMed Central PMCID: PMC4269727. 470-474
12. Stein SC, Graham DI, Chen XH, Smith DH. Association between intravascular microthrombosis and cerebral ischemia in traumatic brain injury. *Neurosurgery.* 2004;54(3):687-91; discussion 91. PubMed PMID: 15028145. 475-477
13. Efrati S, Ben-Jacob E. Reflections on the neurotherapeutic effects of hyperbaric oxygen. *Expert Rev Neurother.* 2014;14(3):233-6. Epub 2014/01/30. doi: 10.1586/14737175.2014.884928. PubMed PMID: 24471697. 478-480
14. Jiang Q, Zhang ZG, Ding GL, Zhang L, Ewing JR, Wang L, et al. Investigation of neural progenitor cell induced angiogenesis after embolic stroke in rat using MRI. *NeuroImage.* 2005;28(3):698-707. doi: 10.1016/j.neuroimage.2005.06.063. PubMed PMID: 16112879. 481-483
15. Tal S, Hadanny A, Berkovitz N, Sasson E, Ben-Jacob E, Efrati S. Hyperbaric oxygen may induce angiogenesis in patients suffering from prolonged post-concussion syndrome due to traumatic brain injury. *Restor Neurol Neurosci.* 2015;33(6):943-51. doi: 10.3233/RNN-150585. PubMed PMID: 26484702. 484-486

- 1  
2  
3 16. Wolf G, Cifu D, Baugh L, Carne W, Profenna L. The effect of hyperbaric oxygen on 488  
4 symptoms after mild traumatic brain injury. *Journal of neurotrauma*. 2012;29(17):2606-12. 489  
5 doi: 10.1089/neu.2012.2549. PubMed PMID: 23031217. 490  
6 17. Cifu DX, Hoke KW, Wetzel PA, Wares JR, Gitchel G, Carne W. Effects of hyperbaric 491  
7 oxygen on eye tracking abnormalities in males after mild traumatic brain injury. *Journal of* 492  
8 *rehabilitation research and development*. 2014;51(7):1047-56. doi: 493  
9 10.1682/JRRD.2014.01.0013. PubMed PMID: 25436771. 494  
10 18. Miller RS, Weaver LK, Bahraini N, Churchill S, Price RC, Skiba V, et al. Effects of 495  
11 hyperbaric oxygen on symptoms and quality of life among service members with persistent 496  
12 postconcussion symptoms: a randomized clinical trial. *JAMA internal medicine*. 497  
13 2015;175(1):43-52. doi: 10.1001/jamainternmed.2014.5479. PubMed PMID: 25401463. 498  
14 19. Smith-Seemiller L, Fow NR, Kant R, Franzen MD. Presence of post-concussion 499  
15 syndrome symptoms in patients with chronic pain vs mild traumatic brain injury. *Brain* 500  
16 *injury*. 2003;17(3):199-206. PubMed PMID: 12623496. 501  
17 20. Hadanny A, Efrati S. Treatment of persistent post-concussion syndrome due to mild 502  
18 traumatic brain injury: current status and future directions. *Expert Rev Neurother*. 503  
19 2016;16(8):875-87. doi: 10.1080/14737175.2016.1205487. PubMed PMID: 27337294. 504  
20 21. Boussi-Gross R, Golan H, Fishlev G, Bechor Y, Volkov O, Bergan J, et al. Hyperbaric 505  
22 oxygen therapy can improve post concussion syndrome years after mild traumatic brain 506  
23 injury - randomized prospective trial. *PLoS One*. 2013;8(11):e79995. doi: 507  
24 10.1371/journal.pone.0079995. PubMed PMID: 24260334; PubMed Central PMCID: 508  
25 PMCPMC3829860. 509  
26 22. Efrati S, Ben-Jacob E. How and why hyperbaric oxygen therapy can bring new hope 510  
27 for children suffering from cerebral palsy--an editorial perspective. *Undersea & hyperbaric* 511  
28 *medicine : journal of the Undersea and Hyperbaric Medical Society, Inc*. 2014;41(2):71-6. 512  
29 PubMed PMID: 24851543. 513  
30 23. Etzion Y, Grossman Y. Pressure-induced depression of synaptic transmission in the 514  
31 cerebellar parallel fibre synapse involves suppression of presynaptic N-type Ca<sup>2+</sup> channels. 515  
32 *Eur J Neurosci*. 2000;12(11):4007-16. Epub 2000/11/09. PubMed PMID: 11069597. 516  
33 24. Berman S, Abu Hamad R, Efrati S. Mesangial cells are responsible for orchestrating 517  
34 the renal podocytes injury in the context of malignant hypertension. *Nephrology (Carlton)*. 518  
35 2013;18(4):292-8. Epub 2013/03/01. doi: 10.1111/nep.12043. PubMed PMID: 23445449. 519  
36 25. Fujita N, Ono M, Tomioka T, Deie M. Effects of hyperbaric oxygen at 1.25 520  
37 atmospheres absolute with normal air on macrophage number and infiltration during rat 521  
38 skeletal muscle regeneration. *PloS one*. 2014;9(12):e115685. doi: 522  
39 10.1371/journal.pone.0115685. PubMed PMID: 25531909; PubMed Central PMCID: 523  
40 PMC4274106. 524  
41 26. Takemura A, Ishihara A. Mild Hyperbaric Oxygen Inhibits Growth-related Decrease in 525  
42 Muscle Oxidative Capacity of Rats with Metabolic Syndrome. *Journal of atherosclerosis and* 526  
43 *thrombosis*. 2017;24(1):26-38. doi: 10.5551/jat.34686. PubMed PMID: 27237220; PubMed 527  
44 Central PMCID: PMC5225130. 528  
45 27. Bhutani S, Vishwanath G. Hyperbaric oxygen and wound healing. *Indian journal of* 529  
46 *plastic surgery : official publication of the Association of Plastic Surgeons of India*. 530  
47 2012;45(2):316-24. doi: 10.4103/0970-0358.101309. PubMed PMID: 23162231; PubMed 531  
48 Central PMCID: PMC3495382. 532  
49 28. Malec JF, Brown AW, Leibson CL, Flaada JT, Mandrekar JN, Diehl NN, et al. The mayo 533  
50 classification system for traumatic brain injury severity. *Journal of neurotrauma*. 534  
51 2007;24(9):1417-24. doi: 10.1089/neu.2006.0245. PubMed PMID: 17892404. 535  
52 29. Dwolatzky T, Whitehead V, Doniger GM, Simon ES, Schweiger A, Jaffe D, et al. 536  
53 Validity of a novel computerized cognitive battery for mild cognitive impairment. *BMC* 537  
54  
55  
56  
57  
58  
59  
60

1  
2  
3  
4  
5  
6  
7  
8  
9  
10  
11  
12  
13  
14  
15  
16  
17  
18  
19  
20  
21  
22  
23  
24  
25  
26  
27  
28  
29  
30  
31  
32  
33  
34  
35  
36  
37  
38  
39  
40  
41  
42  
43  
44  
45  
46  
47  
48  
49  
50  
51  
52  
53  
54  
55  
56  
57  
58  
59  
60

geriatrics. 2003;3:4. doi: 10.1186/1471-2318-3-4. PubMed PMID: 14594456; PubMed Central  
PMCID: PMC270050. 538  
539

30. Zur D, Naftaliev E, Kesler A. Evidence of Multidomain Mild Cognitive Impairment in  
Idiopathic Intracranial Hypertension. *Journal of neuro-ophthalmology : the official journal of*  
*the North American Neuro-Ophthalmology Society.* 2014. doi:  
10.1097/WNO.000000000000199. PubMed PMID: 25383589. 540  
541  
542  
543

31. Doniger GM. Guide to Normative Data 2014 [cited 2014 July, 16th]. Available from:  
[http://www1.neurotrax.com/docs/norms\\_guide.pdf](http://www1.neurotrax.com/docs/norms_guide.pdf). 544  
545

32. Melton JL. Psychometric evaluation of the Mindstreams neuropsychological  
screening tool. Panama City (FL): Navy Experimental Diving Unit (US), 2005 NEDU TR. 546  
547

33. A. Schweiger GMD, T. Dwolatzky, D. Jaffe, E.S. Simon RELIABILITY OF A NOVEL  
COMPUTERIZED NEUROPSYCHOLOGICAL BATTERY FOR MILD COGNITIVE IMPAIRMENT. *ACTA*  
*NEUROPSYCHOLOGICA.* 2003;1(4):407-13. 548  
549  
550

34. Jaszczak RJ, Chang LT, Stein NA, Moore FE. Whole-body single-photon emission  
computed tomography using dual, large-field-of-view scintillation cameras. *Physics in*  
*medicine and biology.* 1979;24(6):1123-43. PubMed PMID: 316897. 551  
552  
553

35. Efrati S, Fishlev G, Bechor Y, Volkov O, Bergan J, Kliakhandler K, et al. Hyperbaric  
oxygen induces late neuroplasticity in post stroke patients--randomized, prospective trial.  
*PloS one.* 2013;8(1):e53716. doi: 10.1371/journal.pone.0053716. PubMed PMID: 23335971;  
PubMed Central PMCID: PMC3546039. 554  
555  
556  
557

36. Chen J, Zhang ZG, Li Y, Wang L, Xu YX, Gautam SC, et al. Intravenous administration  
of human bone marrow stromal cells induces angiogenesis in the ischemic boundary zone  
after stroke in rats. *Circ Res.* 2003;92(6):692-9. Epub 2003/03/01. doi:  
10.1161/01.RES.0000063425.51108.8D. PubMed PMID: 12609969. 558  
559  
560  
561

37. Brown MW, Aggleton JP. Recognition memory: what are the roles of the perirhinal  
cortex and hippocampus? *Nature reviews Neuroscience.* 2001;2(1):51-61. doi:  
10.1038/35049064. PubMed PMID: 11253359. 562  
563  
564

38. Aron AR, Robbins TW, Poldrack RA. Inhibition and the right inferior frontal cortex.  
*Trends in cognitive sciences.* 2004;8(4):170-7. doi: 10.1016/j.tics.2004.02.010. PubMed  
PMID: 15050513. 565  
566  
567

39. Miller EK, Cohen JD. An integrative theory of prefrontal cortex function. *Annual*  
*review of neuroscience.* 2001;24:167-202. doi: 10.1146/annurev.neuro.24.1.167. PubMed  
PMID: 11283309. 568  
569  
570

40. Bush G, Luu P, Posner MI. Cognitive and emotional influences in anterior cingulate  
cortex. *Trends in cognitive sciences.* 2000;4(6):215-22. PubMed PMID: 10827444. 571  
572

41. Harch PG. Hyperbaric oxygen in chronic traumatic brain injury: oxygen, pressure,  
and gene therapy. *Medical gas research.* 2015;5:9. doi: 10.1186/s13618-015-0030-6.  
PubMed PMID: 26171141; PubMed Central PMCID: PMC4499900. 573  
574  
575

42. Harch PG, Andrews SR, Fogarty EF, Amen D, Pezzullo JC, Lucarini J, et al. A phase I  
study of low-pressure hyperbaric oxygen therapy for blast-induced post-concussion  
syndrome and post-traumatic stress disorder. *Journal of neurotrauma.* 2012;29(1):168-85.  
doi: 10.1089/neu.2011.1895. PubMed PMID: 22026588. 576  
577  
578  
579

43. Potter S, Leigh E, Wade D, Fleminger S. The Rivermead Post Concussion Symptoms  
Questionnaire: a confirmatory factor analysis. *Journal of neurology.* 2006;253(12):1603-14.  
doi: 10.1007/s00415-006-0275-z. PubMed PMID: 17063314. 580  
581  
582

583  
584  
585

For peer review only

1  
2  
3  
4  
5  
6  
7  
8  
9  
10  
11  
12  
13  
14  
15  
16  
17  
18  
19  
20  
21  
22  
23  
24  
25  
26  
27  
28  
29  
30  
31  
32  
33  
34  
35  
36  
37  
38  
39  
40  
41  
42  
43  
44  
45  
46  
47  
48  
49  
50  
51  
52  
53  
54  
55  
56  
57  
58  
59  
60

Table 1: Baseline patient characteristics.

587

| Characteristics           | Total      | Mild TBI   | Moderate TBI | Severe TBI | Significance       |
|---------------------------|------------|------------|--------------|------------|--------------------|
| <b>Number of patients</b> | 154 (100%) | 69 (44.8%) | 24 (15.6%)   | 61 (39.6%) |                    |
| <b>Age (years)</b>        | 42.7±14.6  | 48.8±12.0  | 41.7±12.7    | 36.2±15.3  | <b>P&lt;0.0001</b> |
| <b>Sex</b>                |            |            |              |            |                    |
| Males                     | 90 (58.4%) | 31 (44.9%) | 13 (54.2%)   | 46 (75.4%) | <b>P=0.002</b>     |
| Females                   | 64 (41.6%) | 38 (55.1%) | 11 (45.8%)   | 15 (24.6%) |                    |
| <b>Education (years)</b>  | 14.8±3.3   | 14.9±3.6   | 14.9±3.3     | 14.6±3.1   | P=0.895            |
| <b>Traumatic event</b>    |            |            |              |            |                    |



|                                 |             |            |            |            |                |
|---------------------------------|-------------|------------|------------|------------|----------------|
| Motor Vehicle                   |             |            |            |            |                |
| Accident                        | 116 (75.3%) | 56 (81.2%) | 17 (70.8%) | 43 (70.5%) | <b>P=0.048</b> |
| Fall                            | 21 (13.6%)  | 8 (11.6%)  | 1 (4.2%)   | 12 (57.1%) |                |
| Blow                            | 12 (7.8%)   | 5 (7.2%)   | 5 (20.8%)  | 2 (3.3%)   |                |
| Blast                           | 4 (2.6%)    | 0          | 1 (4.2%)   | 3 (4.9%)   |                |
| Penetrating                     | 1 (0.6%)    | 0          | 0          | 1 (0.6%)   |                |
| <b>Time from trauma (years)</b> | 4.6±5.8     | 4.4±5.9    | 5.0±5.8    | 4.6±5.7    | <b>P=0.923</b> |

588

589

Table 1: Baseline patient characteristics (continued).

590

| Characteristics     | Total       | Mild TBI   | Moderate TBI | Severe TBI | Significance       |
|---------------------|-------------|------------|--------------|------------|--------------------|
| <b>Symptoms</b>     |             |            |              |            |                    |
| Cognitive           | 100 (86.2%) | 38 (74.5%) | 19 (90.5%)   | 43 (97.7%) | <b>P=0.004</b>     |
| Motor               | 22 (19.0%)  | 1 (4.8%)   | 1 (4.8%)     | 20 (45.5%) | <b>P&lt;0.0001</b> |
| Sensory             | 32 (27.6%)  | 12 (23.5%) | 7 (33.3%)    | 13 (29.5%) | P=0.653            |
| Dizziness/Vertigo   | 17 (14.7%)  | 14 (27.5%) | 2 (9.5%)     | 1 (2.3%)   | <b>P=0.002</b>     |
| Tinnitus            | 30 (25.9%)  | 26 (51.0%) | 2 (9.5%)     | 2 (4.5%)   | <b>P&lt;0.0001</b> |
| Headaches           | 20 (17.2%)  | 12 (23.5%) | 3 (14.3%)    | 5 (11.4%)  | P=0.272            |
| <b>HBO sessions</b> | 52.0±9.9    | 49.4±10.1  | 49.0±10.3    | 56.1±8.2   | <b>P=0.0001</b>    |

1  
2  
3  
4  
5  
6  
7  
8  
9  
10  
11  
12  
13  
14  
15  
16  
17  
18  
19  
20  
21  
22  
23  
24  
25  
26  
27  
28  
29  
30  
31  
32  
33  
34  
35  
36  
37  
38  
39  
40  
41  
42  
43  
44  
45  
46  
47

|                           |     |             |            |            |            |         |
|---------------------------|-----|-------------|------------|------------|------------|---------|
| <b>HBO protocol (ATA)</b> | 1.5 | 106 (69.3%) | 46 (67.6%) | 18 (75.0%) | 42 (68.9%) | P=0.795 |
|                           | 2   | 47 (30.7%)  | 22 (32.4%) | 6 (25.0%)  | 19 (31.1%) |         |
| <b>Adverse Events</b>     |     | 18 (12.0%)  | 10 (15.2%) | 3 (12.5%)  | 5 (8.3%)   | P=0.499 |

For peer review only

591  
592  
593  
594  
595  
596  
597  
598  
599  
600

Table 2: Cognitive indices pre- and post-HBOT of the entire study cohort

601

602

|                     | <b>Baseline</b> | <b>Post HBOT</b> | <b>Mean Change</b> | <b>P-Value</b>     |
|---------------------|-----------------|------------------|--------------------|--------------------|
| General             | 88.3±15.2       | 92.9±14.2        | 4.6±8.5            | <b>P&lt;0.0001</b> |
| Memory              | 81.7±23.2       | 89.9±21.9        | 8.1±16.9           | <b>P&lt;0.0001</b> |
| Executive Functions | 88.3±16.6       | 94.2±15.1        | 5.9±12.0           | <b>P&lt;0.0001</b> |
| Attention           | 84.3±20.5       | 91.1±18.4        | 6.8±16.5           | <b>P&lt;0.0001</b> |
| IPS                 | 87.5±17.0       | 92.4±15.7        | 4.9±13.1           | <b>P&lt;0.0001</b> |

|              |           |           |          |                    |
|--------------|-----------|-----------|----------|--------------------|
| VSP          | 95.0±18.0 | 98.5±18.0 | 3.4±14.6 | <b>P=0.005</b>     |
| Motor skills | 92.3±17.3 | 96.2±14.5 | 3.9±11.7 | <b>P&lt;0.0001</b> |

603

604

IPS=information processing speed, VSP=visual spatial processing

605

606

607

608

609

610

611

612

613

614

615

1  
2  
3  
4  
5  
6  
7  
8  
9  
10  
11  
12  
13  
14  
15  
16  
17  
18  
19  
20  
21  
22  
23  
24  
25  
26  
27  
28  
29  
30  
31  
32  
33  
34  
35  
36  
37  
38  
39  
40  
41  
42  
43  
44  
45  
46  
47

Table 3: Large significant increases (>10% change) in cognitive indices proportions across TBI groups.

616

|                              | Total      | Mild TBI   | Moderate TBI | Severe TBI |                |
|------------------------------|------------|------------|--------------|------------|----------------|
| General                      | 36 (23.4%) | 15 (21.7%) | 7(29.2%)     | 14 (23.0%) | P=0.756        |
| Memory                       | 64 (41.6%) | 28 (40.6%) | 9 (37.5%)    | 27 (44.3%) | P=0.830        |
| Executive functions          | 51 (33.1%) | 23 (33.3%) | 7 (29.2%)    | 21 (34.9%) | P=0.897        |
| Attention                    | 62 (40.3%) | 27 (39.1%) | 8 (33.3%)    | 27 (44.3%) | P=0.631        |
| Information processing speed | 48 (31.2%) | 23 (33.3%) | 12 (50%)     | 13 (21.3%) | <b>P=0.032</b> |

617

618

For peer review only

1  
2  
3  
4  
5  
6  
7  
8  
9  
10  
11  
12  
13  
14  
15  
16  
17  
18  
19  
20  
21  
22  
23  
24  
25  
26  
27  
28  
29  
30  
31  
32  
33  
34  
35  
36  
37  
38  
39  
40  
41  
42  
43  
44  
45  
46  
47

|    |                                                                                    |     |
|----|------------------------------------------------------------------------------------|-----|
| 1  |                                                                                    |     |
| 2  |                                                                                    |     |
| 3  | <b>Figures legends</b>                                                             | 620 |
| 4  |                                                                                    |     |
| 5  | Figure-1: Patients flowchart.                                                      | 621 |
| 6  |                                                                                    |     |
| 7  | Figure-2: Imaging findings in the severe TBI group                                 | 622 |
| 8  |                                                                                    |     |
| 9  | Figure-3: Mean changes of post- compared to pre-HBOT for the entire cohort.        | 623 |
| 10 |                                                                                    |     |
| 11 |                                                                                    |     |
| 12 | After HBOT, all cognitive domains improved significantly, with the most striking   | 624 |
| 13 |                                                                                    |     |
| 14 | changes seen in memory and attention.                                              | 625 |
| 15 |                                                                                    |     |
| 16 |                                                                                    |     |
| 17 | *p<0.0001, **p=0.005, IPS=information processing speed                             | 626 |
| 18 |                                                                                    |     |
| 19 |                                                                                    |     |
| 20 | Figure-4: Mean changes of post- compared to pre-HBOT across the different TBI      | 627 |
| 21 |                                                                                    |     |
| 22 | severities.                                                                        | 628 |
| 23 |                                                                                    |     |
| 24 |                                                                                    |     |
| 25 | Both patients who suffered mild and severe TBI groups had improvements in general, | 629 |
| 26 |                                                                                    |     |
| 27 | memory, attention, information processing speed and motor skills scores, whereas   | 630 |
| 28 |                                                                                    |     |
| 29 | patients who suffered moderate TBI had significant improvement in memory.          | 631 |
| 30 |                                                                                    |     |
| 31 |                                                                                    |     |
| 32 | *p<0.05, IPS =information processing speed                                         | 632 |
| 33 |                                                                                    |     |
| 34 |                                                                                    |     |
| 35 | Figure-5: The mean relative change in Brodmann areas post HBOT for the entire      | 633 |
| 36 |                                                                                    |     |
| 37 | study cohort.                                                                      | 634 |
| 38 |                                                                                    |     |
| 39 |                                                                                    |     |
| 40 | Figure-6: Cognitive functions correlated with Brodmann areas.                      | 635 |
| 41 |                                                                                    |     |
| 42 |                                                                                    |     |
| 43 | Each of the TBI groups(mild, moderate and severe) had perfusion/metabolism         | 636 |
| 44 |                                                                                    |     |
| 45 | increase in specific Brodmann areas correlated with improved cognitive function.   | 637 |
| 46 |                                                                                    |     |
| 47 |                                                                                    |     |
| 48 |                                                                                    |     |
| 49 |                                                                                    | 638 |
| 50 |                                                                                    |     |
| 51 |                                                                                    |     |
| 52 |                                                                                    |     |
| 53 |                                                                                    |     |
| 54 |                                                                                    |     |
| 55 |                                                                                    |     |
| 56 |                                                                                    |     |
| 57 |                                                                                    |     |
| 58 |                                                                                    |     |
| 59 |                                                                                    |     |
| 60 |                                                                                    |     |



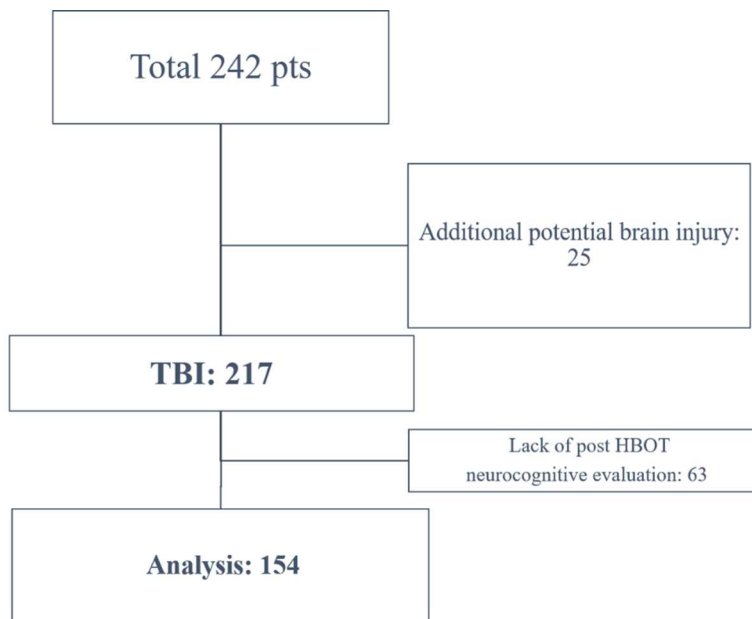

Patients flowchart

334x232mm (300 x 300 DPI)

iew only

1  
2  
3  
4  
5  
6  
7  
8  
9  
10  
11  
12  
13  
14  
15  
16  
17  
18  
19  
20  
21  
22  
23  
24  
25  
26  
27  
28  
29  
30  
31  
32  
33  
34  
35  
36  
37  
38  
39  
40  
41  
42  
43  
44  
45  
46  
47  
48  
49  
50  
51  
52  
53  
54  
55  
56  
57  
58  
59  
60

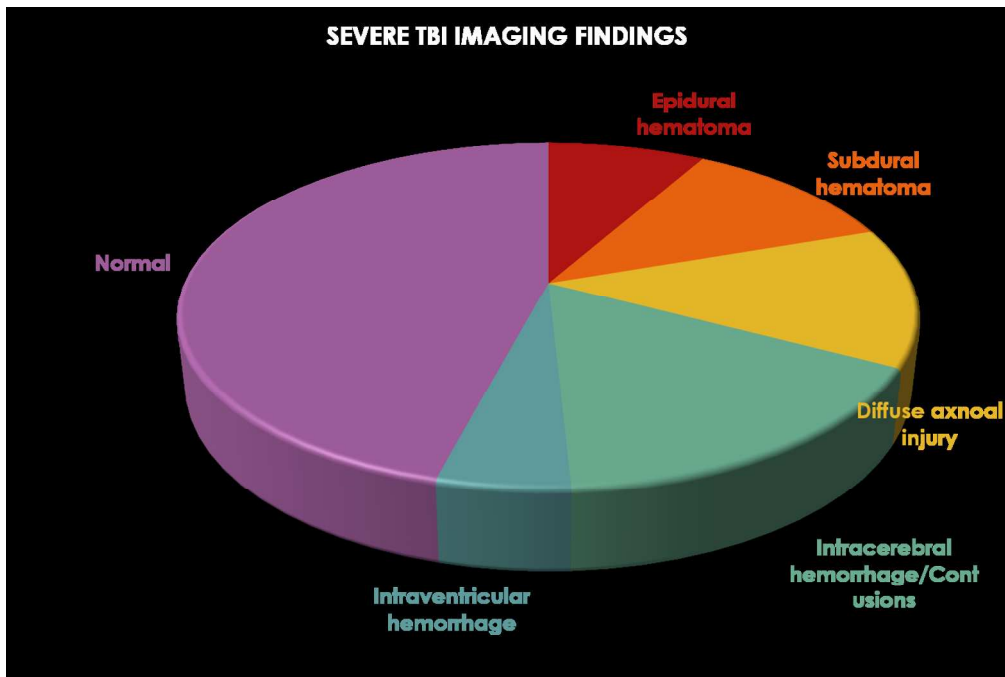

Imaging findings in the severe TBI subgroup

230x154mm (300 x 300 DPI)

view only

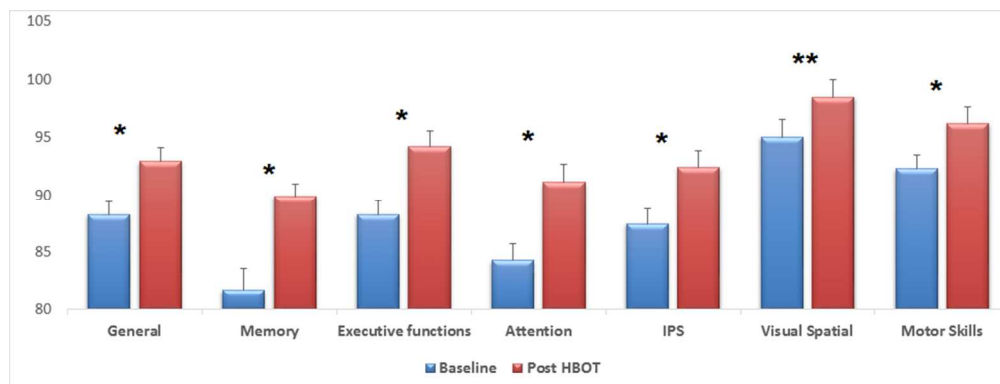

Mean changes of post- compared to pre-HBOT for the entire cohort. After HBOT, all cognitive domains improved significantly, where the most striking changes were seen in memory and attention.

\*p<0.0001, \*\*p=0.005, IPS=information processing speed

204x77mm (300 x 300 DPI)

1  
2  
3  
4  
5  
6  
7  
8  
9  
10  
11  
12  
13  
14  
15  
16  
17  
18  
19  
20  
21  
22  
23  
24  
25  
26  
27  
28  
29  
30  
31  
32  
33  
34  
35  
36  
37  
38  
39  
40  
41  
42  
43  
44  
45  
46  
47  
48  
49  
50  
51  
52  
53  
54  
55  
56  
57  
58  
59  
60



The mean relative change in broadmann areas post HBOT for the entire study cohort  
 261x101mm (300 x 300 DPI)

Peer review only



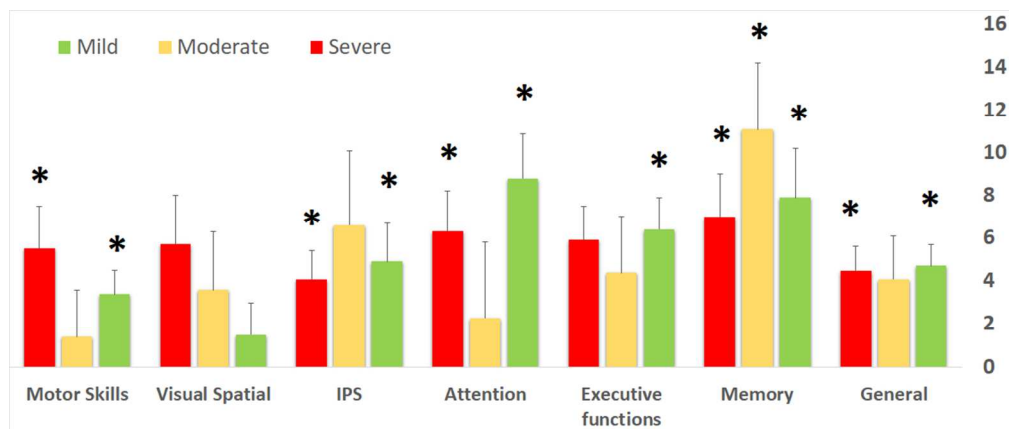

Mean changes of post- compared to pre-HBOT across the different TBI severities.

Both patients who suffered mild and severe TBI groups had improvements in general, memory, attention, information processing speed and motor skills scores, whereas patients who suffered moderate TBI had significant improvement in memory.

\* $p < 0.05$ , IPS = information processing speed

247x104mm (120 x 120 DPI)

## STROBE (Strengthening The Reporting of OBServational Studies in Epidemiology) Checklist

A checklist of items that should be included in reports of observational studies. You must report the page number in your manuscript where you consider each of the items listed in this checklist. If you have not included this information, either revise your manuscript accordingly before submitting or note N/A.

**Note:** An Explanation and Elaboration article discusses each checklist item and gives methodological background and published examples of transparent reporting. The STROBE checklist is best used in conjunction with this article (freely available on the Web sites of PLoS Medicine at <http://www.plosmedicine.org/>, Annals of Internal Medicine at <http://www.annals.org/>, and Epidemiology at <http://www.epidem.com/>). Information on the STROBE Initiative is available at [www.strobe-statement.org](http://www.strobe-statement.org).

| Section and Item     | Item No. | Recommendation                                                                                                                                                                                                                                                                                                                                                                                                                                                                 | Reported on Page No. |
|----------------------|----------|--------------------------------------------------------------------------------------------------------------------------------------------------------------------------------------------------------------------------------------------------------------------------------------------------------------------------------------------------------------------------------------------------------------------------------------------------------------------------------|----------------------|
| Title and Abstract   | 1        | (a) Indicate the study's design with a commonly used term in the title or the abstract                                                                                                                                                                                                                                                                                                                                                                                         |                      |
|                      |          | (b) Provide in the abstract an informative and balanced summary of what was done and what was found                                                                                                                                                                                                                                                                                                                                                                            |                      |
| <b>Introduction</b>  |          |                                                                                                                                                                                                                                                                                                                                                                                                                                                                                |                      |
| Background/Rationale | 2        | Explain the scientific background and rationale for the investigation being reported                                                                                                                                                                                                                                                                                                                                                                                           |                      |
| Objectives           | 3        | State specific objectives, including any prespecified hypotheses                                                                                                                                                                                                                                                                                                                                                                                                               |                      |
| <b>Methods</b>       |          |                                                                                                                                                                                                                                                                                                                                                                                                                                                                                |                      |
| Study Design         | 4        | Present key elements of study design early in the paper                                                                                                                                                                                                                                                                                                                                                                                                                        |                      |
| Setting              | 5        | Describe the setting, locations, and relevant dates, including periods of recruitment, exposure, follow-up, and data collection                                                                                                                                                                                                                                                                                                                                                |                      |
| Participants         | 6        | (a) <i>Cohort study</i> —Give the eligibility criteria, and the sources and methods of selection of participants. Describe methods of follow-up<br><br><i>Case-control study</i> —Give the eligibility criteria, and the sources and methods of case ascertainment and control selection. Give the rationale for the choice of cases and controls<br><br><i>Cross-sectional study</i> —Give the eligibility criteria, and the sources and methods of selection of participants |                      |
|                      |          | (b) <i>Cohort study</i> —For matched studies, give matching criteria and number of exposed and unexposed<br><br><i>Case-control study</i> —For matched studies, give matching criteria and the number of controls per case                                                                                                                                                                                                                                                     |                      |
| Variables            | 7        | Clearly define all outcomes, exposures, predictors, potential confounders, and effect modifiers. Give diagnostic criteria, if applicable                                                                                                                                                                                                                                                                                                                                       |                      |

| Section and Item             | Item No. | Recommendation                                                                                                                                                                                                                                                                                                    | Reported on Page No. |
|------------------------------|----------|-------------------------------------------------------------------------------------------------------------------------------------------------------------------------------------------------------------------------------------------------------------------------------------------------------------------|----------------------|
| Data Sources/<br>Measurement | 8*       | For each variable of interest, give sources of data and details of methods of assessment (measurement). Describe comparability of assessment methods if there is more than one group                                                                                                                              |                      |
| Bias                         | 9        | Describe any efforts to address potential sources of bias                                                                                                                                                                                                                                                         |                      |
| Study Size                   | 10       | Explain how the study size was arrived at                                                                                                                                                                                                                                                                         |                      |
| Quantitative Variables       | 11       | Explain how quantitative variables were handled in the analyses. If applicable, describe which groupings were chosen and why                                                                                                                                                                                      |                      |
| Statistical Methods          | 12       | (a) Describe all statistical methods, including those used to control for confounding                                                                                                                                                                                                                             |                      |
|                              |          | (b) Describe any methods used to examine subgroups and interactions                                                                                                                                                                                                                                               |                      |
|                              |          | (c) Explain how missing data were addressed                                                                                                                                                                                                                                                                       |                      |
|                              |          | (d) <i>Cohort study</i> —If applicable, explain how loss to follow-up was addressed<br><br><i>Case-control study</i> —If applicable, explain how matching of cases and controls was addressed<br><br><i>Cross-sectional study</i> —If applicable, describe analytical methods taking account of sampling strategy |                      |
|                              |          | (e) Describe any sensitivity analyses                                                                                                                                                                                                                                                                             |                      |
| <b>Results</b>               |          |                                                                                                                                                                                                                                                                                                                   |                      |
| Participants                 | 13*      | (a) Report numbers of individuals at each stage of study—eg numbers potentially eligible, examined for eligibility, confirmed eligible, included in the study, completing follow-up, and analysed                                                                                                                 |                      |
|                              |          | (b) Give reasons for non-participation at each stage                                                                                                                                                                                                                                                              |                      |
|                              |          | (c) Consider use of a flow diagram                                                                                                                                                                                                                                                                                |                      |
| Descriptive Data             | 14*      | (a) Give characteristics of study participants (eg demographic, clinical, social) and information on exposures and potential confounders                                                                                                                                                                          |                      |
|                              |          | (b) Indicate number of participants with missing data for each variable of interest                                                                                                                                                                                                                               |                      |
|                              |          | (c) <i>Cohort study</i> —Summarise follow-up time (eg, average and total amount)                                                                                                                                                                                                                                  |                      |
| Outcome Data                 | 15*      | <i>Cohort study</i> —Report numbers of outcome events or summary measures over time                                                                                                                                                                                                                               |                      |
|                              |          | <i>Case-control study</i> —Report numbers in each exposure category, or summary measures of exposure                                                                                                                                                                                                              |                      |
|                              |          | <i>Cross-sectional study</i> —Report numbers of outcome events or summary measures                                                                                                                                                                                                                                |                      |



| Section and Item         | Item No. | Recommendation                                                                                                                                                                                               | Reported on Page No. |
|--------------------------|----------|--------------------------------------------------------------------------------------------------------------------------------------------------------------------------------------------------------------|----------------------|
| Main Results             | 16       | (a) Give unadjusted estimates and, if applicable, confounder-adjusted estimates and their precision (eg, 95% confidence interval). Make clear which confounders were adjusted for and why they were included |                      |
|                          |          | (b) Report category boundaries when continuous variables were categorized                                                                                                                                    |                      |
|                          |          | (c) If relevant, consider translating estimates of relative risk into absolute risk for a meaningful time period                                                                                             |                      |
| Other Analyses           | 17       | Report other analyses done—eg analyses of subgroups and interactions, and sensitivity analyses                                                                                                               |                      |
| <b>Discussion</b>        |          |                                                                                                                                                                                                              |                      |
| Key Results              | 18       | Summarise key results with reference to study objectives                                                                                                                                                     |                      |
| Limitations              | 19       | Discuss limitations of the study, taking into account sources of potential bias or imprecision. Discuss both direction and magnitude of any potential bias                                                   |                      |
| Interpretation           | 20       | Give a cautious overall interpretation of results considering objectives, limitations, multiplicity of analyses, results from similar studies, and other relevant evidence                                   |                      |
| Generalisability         | 21       | Discuss the generalisability (external validity) of the study results                                                                                                                                        |                      |
| <b>Other Information</b> |          |                                                                                                                                                                                                              |                      |
| Funding                  | 22       | Give the source of funding and the role of the funders for the present study and, if applicable, for the original study on which the present article is based                                                |                      |

\*Give information separately for cases and controls in case-control studies and, if applicable, for exposed and unexposed groups in cohort and cross-sectional studies.

**Once you have completed this checklist, please save a copy and upload it as part of your submission. DO NOT include this checklist as part of the main manuscript document. It must be uploaded as a separate file.**

# BMJ Open

## The effect of hyperbaric oxygen therapy on chronic neurocognitive function of deficits post traumatic brain injury patients – retrospective analysis

|                                 |                                                                                                                                                                                                                                                                                                                                                                                                                                                                                                                                                                                         |
|---------------------------------|-----------------------------------------------------------------------------------------------------------------------------------------------------------------------------------------------------------------------------------------------------------------------------------------------------------------------------------------------------------------------------------------------------------------------------------------------------------------------------------------------------------------------------------------------------------------------------------------|
| Journal:                        | <i>BMJ Open</i>                                                                                                                                                                                                                                                                                                                                                                                                                                                                                                                                                                         |
| Manuscript ID                   | bmjopen-2018-023387.R2                                                                                                                                                                                                                                                                                                                                                                                                                                                                                                                                                                  |
| Article Type:                   | Research                                                                                                                                                                                                                                                                                                                                                                                                                                                                                                                                                                                |
| Date Submitted by the Author:   | 27-Jun-2018                                                                                                                                                                                                                                                                                                                                                                                                                                                                                                                                                                             |
| Complete List of Authors:       | Hadanny, Amir; Galilee Medical Center, Neuosurgery; Assaf Harofeh Medical Center, Sagol Center for Hyperbaric Medicine and Research<br>Abbott, Stefanie; Asaf Harofeh Medical Center, Sagol Center for Hyperbaric Medicine and Research<br>Suzin, Gil; Asaf Harfoeh Medical Center, Sagol Center for Hyperbaric Medicine and Research<br>Bechor, Yair; Asaf Harofeh Medical Center, Sagol Center for Hyperbaric Medicine and Research<br>Efrati, Shai; Assaf Harofeh Medical Center, Sagol Center for Hyperbaric Medicine and Research; Tel Aviv University, Sackler School of Medicine |
| <b>Primary Subject Heading</b>: | Neurology                                                                                                                                                                                                                                                                                                                                                                                                                                                                                                                                                                               |
| Secondary Subject Heading:      | Rehabilitation medicine                                                                                                                                                                                                                                                                                                                                                                                                                                                                                                                                                                 |
| Keywords:                       | tbi, hbot, traumatic brain injury, hyperbaric oxygen, cognitive                                                                                                                                                                                                                                                                                                                                                                                                                                                                                                                         |
|                                 |                                                                                                                                                                                                                                                                                                                                                                                                                                                                                                                                                                                         |

SCHOLARONE™  
Manuscripts

1  
2  
3 **The effect of hyperbaric oxygen therapy on chronic neurocognitive function of** 1  
4  
5 **deficits post traumatic brain injury patients – retrospective analysis** 2

6  
7 Amir Hadanny MD<sup>1,2,3,5</sup>, Stefanie Abbott BA<sup>2</sup>, Gil Suzin MA<sup>2</sup>, Yair Bechor BA<sup>2</sup>, 3

8  
9 Shai Efrati MD<sup>2,4,5,6</sup> 4

10  
11 <sup>1</sup>Neurosurgery department, Galilee Medical Center, Naharyia, Israel 5

12  
13  
14 <sup>2</sup>Sagol Center for Hyperbaric Medicine and Research, Assaf Harofeh Medical Center, 6  
15  
16 Zerifin, Israel 7

17  
18  
19 <sup>3</sup>Galilee Faculty of Medicine, Bar Ilan University, Israel 8

20  
21  
22 <sup>4</sup>Research and Development Unit, Assaf Harofeh Medical Center, 70300 Zerifin, 9  
23  
24 Israel. 10

25  
26  
27 <sup>5</sup>Sackler School of Medicine, Tel-Aviv University, 69978 Tel-Aviv, Israel 11

28  
29  
30 <sup>6</sup>Sagol School of Neuroscience, Tel-Aviv University, 69978 Tel-Aviv, Israel 12

31  
32  
33  
34  
35  
36 *Corresponding author:* 14

37  
38 *Dr. Amir Hadanny,* 15

39  
40 Sagol Center for Hyperbaric Medicine and Research, 16

41  
42 Assaf Harofeh Medical Center, Zerifin, Israel 17

43  
44 T:972-8-9779395 F: 972-8-9542238 18

45  
46 E-mail: [Amir.had@gmail.com](mailto:Amir.had@gmail.com) 19

47  
48  
49  
50  
51  
52  
53  
54  
55 *Author Disclosure Statement* 22

|    |                                                                                                |    |
|----|------------------------------------------------------------------------------------------------|----|
| 1  |                                                                                                |    |
| 2  |                                                                                                |    |
| 3  | No competing financial interests exist.                                                        | 23 |
| 4  |                                                                                                |    |
| 5  |                                                                                                |    |
| 6  | No funding received for this work.                                                             | 24 |
| 7  |                                                                                                |    |
| 8  |                                                                                                |    |
| 9  | No conflict of interests exists.                                                               | 25 |
| 10 |                                                                                                |    |
| 11 |                                                                                                |    |
| 12 | <b><i>Contributorship statement</i></b>                                                        | 26 |
| 13 |                                                                                                |    |
| 14 | AH: concept, data collection, data analysis, manuscript draft, manuscript review               | 27 |
| 15 |                                                                                                |    |
| 16 |                                                                                                |    |
| 17 | SA: data collection, data analysis                                                             | 28 |
| 18 |                                                                                                |    |
| 19 |                                                                                                |    |
| 20 | GS: data collection, manuscript review                                                         | 29 |
| 21 |                                                                                                |    |
| 22 |                                                                                                |    |
| 23 | YB: data collection, manuscript review                                                         | 30 |
| 24 |                                                                                                |    |
| 25 |                                                                                                |    |
| 26 | SE: concept, data analysis, manuscript draft, manuscript review                                | 31 |
| 27 |                                                                                                |    |
| 28 |                                                                                                |    |
| 29 | <b><i>Data sharing statement</i></b>                                                           | 32 |
| 30 |                                                                                                |    |
| 31 |                                                                                                |    |
| 32 | Extra data is available by emailing <a href="mailto:amir.had@gmail.com">amir.had@gmail.com</a> | 33 |
| 33 |                                                                                                |    |
| 34 |                                                                                                |    |
| 35 |                                                                                                | 34 |
| 36 |                                                                                                |    |
| 37 |                                                                                                |    |
| 38 | Running title: HBOT improves cognitive function in TBI                                         | 35 |
| 39 |                                                                                                |    |
| 40 |                                                                                                |    |
| 41 | Number of references: 43                                                                       | 36 |
| 42 |                                                                                                |    |
| 43 | Word count: 3615                                                                               | 37 |
| 44 |                                                                                                |    |
| 45 | Tables: 3                                                                                      | 38 |
| 46 |                                                                                                |    |
| 47 | Figures: 6                                                                                     | 39 |
| 48 |                                                                                                |    |
| 49 |                                                                                                |    |
| 50 |                                                                                                | 40 |
| 51 |                                                                                                |    |
| 52 |                                                                                                | 41 |
| 53 |                                                                                                |    |
| 54 | <b>Abstract</b>                                                                                | 42 |
| 55 |                                                                                                |    |
| 56 | <i>Objectives</i>                                                                              | 43 |
| 57 |                                                                                                |    |
| 58 |                                                                                                |    |
| 59 |                                                                                                |    |
| 60 |                                                                                                |    |

1  
2  
3 The aim of the study is to evaluate the effect of hyperbaric oxygen therapy (HBOT) in 44  
4 participants suffering from chronic neurological deficits due to traumatic brain injury 45  
5 (TBI) of all severities in the largest cohort evaluated so far with objective cognitive 46  
6 function tests and metabolic brain imaging. 47  
7  
8  
9

### 10 11 *Methods* 48 12

13 A retrospective analysis was conducted of 154 patients suffering from chronic 49  
14 neurocognitive damage due to TBI, who had undergone computerized cognitive 50  
15 evaluations pre- and post-HBOT treatment. 51  
16  
17  
18  
19

### 20 21 *Results* 52 22

23 The average age was 42.7±14.6 years and 58.4% were males. All patients had 53  
24 documented traumatic brain injury 0.3-33 years (mean 4.6±5.8, median 2.75 years) 54  
25 prior to HBOT. HBOT was associated with significant improvement in all of the 55  
26 cognitive domains, with mean change in global cognitive scores of 4.6±8.5 56  
27 (p<0.00001). The most prominent improvements were in memory index and attention, 57  
28 with mean changes of 8.1±16.9 (p<0.00001) and 6.8±16.5 (p<0.0001), respectively. 58  
29  
30 The most striking changes observed in brain single photon emission computed 59  
31 tomography (SPECT) images were in the anterior cingulate and the post-central 60  
32 cortex, in the prefrontal areas and in the temporal areas. 61  
33  
34  
35  
36  
37  
38  
39  
40  
41  
42

### 43 44 *Conclusions* 62 45

46 In the largest published cohort of patients suffering from chronic deficits post TBI of 63  
47 all severities, HBOT was associated with significant cognitive improvements. The 64  
48 clinical improvements were well correlated with increased activity in the relevant 65  
49 brain areas. 66  
50  
51  
52  
53  
54  
55  
56  
57  
58  
59  
60

1  
2  
3 Keywords: hyperbaric oxygen, HBOT, post-concussion, PCS, TBI, traumatic brain 68  
4  
5 injury 69  
6

7 **Article Summary** 70  
8

9  
10 *Strengths and limitations of the study* 71  
11

- 12  
13 • The major limitation relates to its retrospective methodology, however this 72  
14 limitation is diminished by the fact that all patients of the study large cohort 73  
15 were treated at late chronic stages. 74  
16  
17 • In regards to strengths, objective cognitive assessments using computerized 75  
18 tests (which are superior to any clinical questionnaire), were performed on 76  
19 each patient both pre- and post-treatment. 77  
20  
21 • The study cohort consisted of a civilian population that does not have any 78  
22 potential secondary gain (such as financial compensation by reporting sick). 79  
23  
24  
25  
26  
27  
28  
29  
30

31 80  
32  
33  
34  
35  
36  
37  
38  
39  
40  
41  
42  
43  
44  
45  
46  
47  
48  
49  
50  
51  
52  
53  
54  
55  
56  
57  
58  
59  
60

|    |                                                                                          |     |
|----|------------------------------------------------------------------------------------------|-----|
| 1  |                                                                                          |     |
| 2  |                                                                                          |     |
| 3  | <b><i>Introduction</i></b>                                                               | 81  |
| 4  |                                                                                          |     |
| 5  |                                                                                          |     |
| 6  | Traumatic brain injury (TBI) is one of the leading causes of death and disability in the | 82  |
| 7  | general population.(1) Following TBI, patients may experience a set of symptoms          | 83  |
| 8  | known as post-concussion syndrome (PCS). PCS symptoms include headaches,                 | 84  |
| 9  | dizziness, neuropsychiatric symptoms, and cognitive impairments.(2) PCS can              | 85  |
| 10 | continue for weeks or months, and up to 25% of all patients experience prolonged         | 86  |
| 11 | PCS (PPCS) in which the symptoms last for over six months.(3)                            | 87  |
| 12 |                                                                                          |     |
| 13 |                                                                                          |     |
| 14 | In the past years there is growing clinical evidence regarding the effect of hyperbaric  | 88  |
| 15 | oxygen therapy (HBOT) on PCS.(4-6) Unfortunately, the clinical data gathered from        | 89  |
| 16 | those studies can be conflicting due to several inherent procedural issues, such as the  | 90  |
| 17 | use of non-objective end points, the lack of appropriate brain imaging as part of the    | 91  |
| 18 | inclusion criteria, the inappropriate placebo of a hyperbaric environment, and the       | 92  |
| 19 | inclusion of patients that may gain secondary benefits from reporting sick.(4, 5) The    | 93  |
| 20 | current study represents the largest cohort evaluated until now of civilian participants | 94  |
| 21 | suffering from PCS treated by HBOT, who had undergone objective metabolic brain          | 95  |
| 22 | imaging and a computerized neurocognitive test battery before and after the treatment.   | 96  |
| 23 |                                                                                          |     |
| 24 |                                                                                          |     |
| 25 |                                                                                          |     |
| 26 |                                                                                          |     |
| 27 |                                                                                          |     |
| 28 |                                                                                          |     |
| 29 |                                                                                          |     |
| 30 |                                                                                          |     |
| 31 |                                                                                          |     |
| 32 |                                                                                          |     |
| 33 |                                                                                          |     |
| 34 |                                                                                          |     |
| 35 |                                                                                          |     |
| 36 |                                                                                          |     |
| 37 |                                                                                          |     |
| 38 |                                                                                          |     |
| 39 |                                                                                          |     |
| 40 | <b><i>Pathophysiology of PCS and HBOT</i></b>                                            | 97  |
| 41 |                                                                                          |     |
| 42 | The most common pathological mechanism in TBI is diffuse shearing of axonal              | 98  |
| 43 | pathways and small blood vessels, also known as diffuse axonal injury.(7) Secondary      | 99  |
| 44 | pathological mechanisms of TBI include ischemia, mild edema, and other                   | 100 |
| 45 | biochemical and inflammatory processes culminating in impaired regenerative and/or       | 101 |
| 46 | healing processes resulting from increasing tissue hypoxia.(8) Due to the diffuse        | 102 |
| 47 | nature of injury, affecting multiple brain areas,(9, 10) cognitive impairments are       | 103 |
| 48 | usually the predominant symptoms.                                                        | 104 |
| 49 |                                                                                          |     |
| 50 |                                                                                          |     |
| 51 |                                                                                          |     |
| 52 |                                                                                          |     |
| 53 |                                                                                          |     |
| 54 |                                                                                          |     |
| 55 |                                                                                          |     |
| 56 |                                                                                          |     |
| 57 |                                                                                          |     |
| 58 |                                                                                          |     |
| 59 |                                                                                          |     |
| 60 |                                                                                          |     |

1  
2  
3 Global brain hypoperfusion, and its related tissue ischemia, detected in patients 105  
4 suffering from TBI, serves as a rate-limiting factor for any regenerative process.(11- 106  
5  
6  
7 13) By increasing the oxygen level in blood and body tissues, HBOT can augment the 107  
8  
9 repair mechanisms.(14) Various models have strongly suggested that HBOT can 108  
10 induce angiogenesis, improve brain plasticity, enhance neurogenesis and 109  
11 synaptogenesis and foster functional recovery.(15, 16) 110  
12  
13  
14  
15

### 16 *Conflicting clinical HBOT data and objective measurements in PCS* 111

17  
18  
19 Some of the previous studies which evaluated the effect of HBOT on chronic 112  
20 neurological and cognitive impairments due to TBI, mainly used self-assessment 113  
21 questionnaires as their primary endpoints.(17-19) Such endpoints have several 114  
22 inherent disadvantages. First, they lack an objective evaluation that is not biased by 115  
23 the patients' perspectives. Second, self-administrated questionnaires are exposed to 116  
24 various confounding variables such as litigation and compensation.(20). Unlike the 117  
25 questionnaires, standardized cognitive tests with high test-retest reliability can and 118  
26 should be used as objective evaluations of neurocognitive impairments.(21) In 119  
27 addition, novel brain imaging techniques such as single photon emission computed 120  
28 tomography (SPECT) and perfusion sequences in magnetic resonance imaging (MRI), 121  
29 which evaluate cerebral blood flow and brain metabolism, can shed new light in PCS 122  
30 diagnosis and in evaluating therapeutic interventions.(21) In clinical studies which 123  
31 utilized objective cognitive assessments, HBOT was found to induce significant 124  
32 improvements in patients suffering from PCS due to mild TBI. (6, 14, 16, 22) 125  
33  
34  
35 However, to the best of our knowledge, the objective effect of HBOT on chronic 126  
36 neurocognitive impairments stemming from moderate to severe TBI (in addition to 127  
37 mild) has not been investigated. 128  
38  
39  
40  
41  
42  
43  
44  
45  
46  
47  
48  
49  
50  
51  
52  
53  
54  
55  
56  
57  
58  
59  
60



1  
2  
3 In addition to objective evaluations, there are inherent ethical and logistic difficulties 129  
4 in handling the sham control in HBOT trials.(4, 5, 21, 23) HBOT includes two active 130  
5 ingredients: pressure and oxygen. Pressure is needed to increase plasma oxygen, but 131  
6 the pressure change alone may also have significant cellular effects.(5) Additionally, 132  
7 the greatest effect of pressure is in human tissues that are under tight autoregulation 133  
8 pressure control, such as the brain, where the intracranial pressure is normally 0.0092- 134  
9 0.0197atm.(24, 25) To generate a pressure sensation, the chamber pressure must be 135  
10 1.2ATA or higher. However, such a change in environmental pressure (from 1ATA 136  
11 to 1.2 ATA) and subsequent tissue oxygenation (with an increase of tissue 137  
12 oxygenation by at least 50%) has a significant biologic effect (26, 27) Thus, sham 138  
13 therapy in previous studies using 1.2 ATA on 21% inhaled oxygen (i.e., air) cannot be 139  
14 regarded as an inert or sham control but rather as a lower dose of the active 140  
15 ingredient.(4, 21) In regards to a possible effect of vasoconstriction of the large blood 141  
16 vessels induced by hyperbaric oxygen - it has been well established that the tissues 142  
17 are saturated by hyperoxia and do not suffer from hypoxia, as the vasoconstriction 143  
18 effect is compensated by increased plasma oxygen content and microvascular blood 144  
19 flow. (28) 145

20  
21  
22 Any increase in pressure, even with reduced oxygen percentage, cannot serve as a true 146  
23 placebo, but rather as a low dosage of the active ingredient, further supporting the 147  
24 need for objective data gathered from large cohorts of patients suffering from PCS 148  
25 and treated by HBOT. 149

26  
27  
28 The aim of the current study was to evaluate the objective effects of HBOT on TBI 150  
29 patients suffering from chronic neurological deficits stemming from mild, moderate, 151  
30 and severe TBI, in the largest cohort evaluated until now. Since all the patients had 152  
31 metabolic brain imaging and a computerized neurocognitive test battery before and 153

1  
2  
3 after HBOT, correlations between specific cognitive indexes and their related brain 154  
4  
5 regions activity were also evaluated. 155  
6  
7  
8  
9

156

10  
11  
12  
13  
14  
15  
16  
17  
18  
19  
20  
21  
22  
23  
24  
25  
26  
27  
28  
29  
30  
31  
32  
33  
34  
35  
36  
37  
38  
39  
40  
41  
42  
43  
44  
45  
46  
47  
48  
49  
50  
51  
52  
53  
54  
55  
56  
57  
58  
59  
60

For peer review only

|    |                                                                                       |     |
|----|---------------------------------------------------------------------------------------|-----|
| 1  |                                                                                       |     |
| 2  |                                                                                       |     |
| 3  | <b><i>Materials and Methods</i></b>                                                   | 157 |
| 4  |                                                                                       |     |
| 5  |                                                                                       |     |
| 6  | <i>Participants</i>                                                                   | 158 |
| 7  |                                                                                       |     |
| 8  | A retrospective analysis was conducted on patients suffering from TBI-related chronic | 159 |
| 9  | neurocognitive damage (more than 3 months from injury), treated by HBOT between       | 160 |
| 10 | January 2008 and January 2017 at the Sagol Center for Hyperbaric Medicine and         | 161 |
| 11 | Research, Assaf Harofeh Medical Center, Israel. Patients were included if they had    | 162 |
| 12 | pre- and post-HBOT computerized cognitive evaluations. Patients with a history of     | 163 |
| 13 | potential additional brain insults, such as spontaneous subarachnoid hemorrhage,      | 164 |
| 14 | anoxic brain injury, or history of prior cognitive impairment, were excluded (Figure- | 165 |
| 15 | 1).                                                                                   | 166 |
| 16 |                                                                                       |     |
| 17 | The study was approved by the Institutional Review Board of Asaf Harfoeh Medical      | 167 |
| 18 | Center.                                                                               | 168 |
| 19 |                                                                                       |     |
| 20 | <i>Patients and public involvement</i>                                                | 169 |
| 21 |                                                                                       |     |
| 22 | Patients and public weren't involved in the study due to its retrospective nature.    | 170 |
| 23 |                                                                                       |     |
| 24 | <i>TBI severity</i>                                                                   | 171 |
| 25 |                                                                                       |     |
| 26 | TBI severities were rated according to the TBI admission documents. Mild TBI was      | 172 |
| 27 | defined as loss of consciousness (LOC) with duration of 0–30 minutes, post traumatic  | 173 |
| 28 | amnesia (PTA) with duration of less than a day and a Glasgow coma scale (GCS)         | 174 |
| 29 | grade of 13–15. (29) Moderate TBI was defined as LOC with duration of more than       | 175 |
| 30 | 30 minutes and up to 24 hours, PTA with duration of 1-7 days and GCS grade of 9-      | 176 |
| 31 | 12. Severe TBI was defined as LOC with duration of more than 24 hours, PTA with       | 177 |
| 32 | duration of more than seven days, and GCS less than 9. In addition, if there was      | 178 |
| 33 | imaging evidence of an injury such as a hematoma, contusion or hemorrhage, then the   | 179 |
| 34 | TBI was classified as moderate to severe. (29)                                        | 180 |
| 35 |                                                                                       |     |
| 36 | <i>Hyperbaric oxygen treatment</i>                                                    | 181 |
| 37 |                                                                                       |     |
| 38 |                                                                                       |     |
| 39 |                                                                                       |     |
| 40 |                                                                                       |     |
| 41 |                                                                                       |     |
| 42 |                                                                                       |     |
| 43 |                                                                                       |     |
| 44 |                                                                                       |     |
| 45 |                                                                                       |     |
| 46 |                                                                                       |     |
| 47 |                                                                                       |     |
| 48 |                                                                                       |     |
| 49 |                                                                                       |     |
| 50 |                                                                                       |     |
| 51 |                                                                                       |     |
| 52 |                                                                                       |     |
| 53 |                                                                                       |     |
| 54 |                                                                                       |     |
| 55 |                                                                                       |     |
| 56 |                                                                                       |     |
| 57 |                                                                                       |     |
| 58 |                                                                                       |     |
| 59 |                                                                                       |     |
| 60 |                                                                                       |     |

1  
2  
3 Patients were treated with 40-70 daily hyperbaric sessions, 5 days a week. Each 182  
4 session consisted of 60 minutes of exposure to 100% oxygen at 1.5-2 ATA. 183  
5

6  
7 *Cognitive assessment* 184  
8

9  
10 The patients' cognitive functions were assessed by NeuroTrax computerized cognitive 185  
11 tests (NeuroTrax Corp., NY).(30) The NeuroTrax tests evaluate various aspects of 186  
12 brain functions and include verbal memory (immediate and delayed recognition), non- 187  
13 verbal memory (immediate and delayed recognition), go/no go response inhibition, 188  
14 problem solving, Stroop interference, finger tapping, catch game, staged information 189  
15 processing speed (single digit, two-digit and three-digit arithmetic), verbal function 190  
16 and visual spatial processing. Cognitive index scores were computed from the 191  
17 normalized outcome parameters for memory, executive function, attention, 192  
18 information processing speed, visual spatial, verbal function and motor skills 193  
19 domains.(31) A global cognitive score was computed as the average of all index 194  
20 scores for each individual. 195  
21  
22  
23  
24  
25  
26  
27  
28  
29  
30  
31  
32  
33

34 After administration, the NeuroTrax data were uploaded to the NeuroTrax central 196  
35 server, and outcome parameters were automatically calculated using software blind to 197  
36 diagnosis or testing site. To account for the well-known effects of age and education 198  
37 on cognitive performance, each outcome parameter was normalized and fit to an IQ- 199  
38 like scale (mean=100, S.D.=15) according to the patient's age and education. The 200  
39 normative data used by NeuroTrax consist of test data from cognitively healthy 201  
40 individuals in controlled research studies at more than 10 sites. (32) 202  
41  
42  
43  
44  
45  
46  
47  
48  
49

50 Specifically, the patients were given two different versions of the NeuroTrax test 203  
51 battery before and after HBOT, to allow repeated administrations with minimal 204  
52 learning effects. Test-retest reliability for these versions was evaluated and found to 205  
53  
54  
55  
56  
57  
58  
59  
60

1  
2  
3 be high, with no significant learning effect.(33, 34) Regarding the current study 206  
4 cohort, in a previous randomized controlled trial in patients suffering from TBI, the 207  
5 NeuroTrax scores were found to be stable in the retest of the control group.(22) 208  
6  
7  
8  
9

### 10 *Brain SPECT imaging* 209

11  
12 Brain activity was assessed using single photon emission computed tomography 210  
13 (SPECT) 1-2 weeks prior to and after the HBOT period. The SPECT method was 211  
14 selected for evaluation due to its known normal range and test/retest established 212  
15 validity. The imaging was conducted using 925–1,110 MBq (25–30 mCi) of a 213  
16 technetium-99-methyl-cysteinate-dimer (Tc-99m-ECD) at 40–60 min post injection, 214  
17 using a dual detector gamma camera (ECAM or Symbia T, Siemens Medical 215  
18 Systems) equipped with high resolution collimators. Data was acquired in 3-degree 216  
19 steps and reconstructed iteratively using the Chang method of attenuation correction 217  
20 ( $\mu = 0.12/\text{cm}$ ). (35) 218  
21  
22  
23  
24  
25  
26  
27  
28  
29  
30  
31  
32

33 Both pre- and post-treatment SPECT images were normalized to the median maximal 219  
34 brain activity in the entire brain, and were then reoriented into Talairach space using 220  
35 NeuroGam software (Segami Corporation) to identify Brodmann cortical areas and to 221  
36 compute the mean perfusion in each Brodmann area (BA). In addition, volume- 222  
37 rendered brain perfusion images were reconstructed and normalized to the entire brain 223  
38 median maximal activity. All SPECT analyses were done by study team members 224  
39 who were blinded to the laboratory and clinical data. SPECT scans were performed 225  
40 late morning to midday. On the day of the SPECT scan, patients were treated with 226  
41 only their chronic medications and were instructed not to smoke. Changes in 227  
42 perfusion in all Brodmann areas for each subject were determined by calculating the 228  
43  
44  
45  
46  
47  
48  
49  
50  
51  
52  
53  
54  
55  
56  
57  
58  
59  
60

1  
2  
3 percentage of the difference of the normalized activity values between post-treatment 229  
4 and pre-treatment divided by the pre-treatment value. 230  
5  
6

7  
8 *Statistical Analysis* 231  
9

10 Continuous data were expressed as means  $\pm$  standard deviations. The normal 232  
11 distribution for all variables was tested using the Kolmogorov-Smirnov test. The 233  
12 mean differences between cognitive index scores before and after HBOT were 234  
13 analyzed using one-way ANOVA with post-hoc Bonferroni tests. Multiple linear 235  
14 regression models and multivariate logistic regression models were performed to 236  
15 control for potential confounders and to determine independent predictors for clinical 237  
16 outcome. The alpha level was set to 0.05. Data were statistically analyzed using SPSS 238  
17 software (version 22.0). 239  
20  
21  
22  
23  
24  
25  
26  
27  
28  
29  
30  
31  
32  
33  
34  
35  
36  
37  
38  
39  
40  
41  
42  
43  
44  
45  
46  
47  
48  
49  
50  
51  
52  
53  
54  
55  
56  
57  
58  
59  
60

250

251

252

253

254

255

**Results**

256

*Patient profiles*

257

Of the 242 patients suffering from neurocognitive impairment due to TBI treated by HBOT between January 2008 and January 2017, 25 patients had potential additional brain insults and 63 did not have repeat computerized neurocognitive evaluations. Therefore, 154 patients were included in the final analysis, of whom 100 patients completed pre- and post-HBOT SPECT imaging (Figure-1).

The patients' baseline characteristics are summarized in Table 1. The average age was 42.7±14.6 years and 58.4% were males. All patients had documented traumatic brain injury 3 months to 33 years (mean 4.6±5.8, median 2.75 years) prior to HBOT. Sixty-nine (44.8%) had neurocognitive impairments due to mild TBI, 24 (15.6%) moderate TBI and 61 (39.6%) severe TBI. Most of the patients (86.2%) complained of cognitive impairment as their main symptom (Table 1).

Patients were treated with 40-70 (mean 52.0±9.9) sessions of hyperbaric oxygen at 1.5-2 ATA. 18 (12%) patients reported adverse events, which included mild barotrauma of the ears and palpitations/dyspnea, while in the chamber.

1  
2  
3 *Severity of TBI* 272  
4

5  
6 In our cohort, patients who suffered severe TBI were found to be younger with higher 273  
7  
8 proportion of males than in the mild and moderate TBI groups ( $P<0.0001$ ,  $P=0.002$  274  
9  
10 respectively, Table 1). As expected, the severe TBI group had significantly higher 275  
11  
12 proportions of cognitive impairment and motor deficits ( $p=0.004$  and  $p<0.0001$  276  
13  
14 respectively, Table 1). The mild and moderate TBI groups had higher percentages of 277  
15  
16 tinnitus and/or dizziness ( $p<0.0001$ ,  $p=0.002$  respectively, Table 1). 278

17  
18  
19 *Severe TBI* 279

20  
21 Sixty-one patients had severe TBI. The main imaging findings at their admission are 280  
22  
23 summarized in Figure-2. Of those 61 patients, 36 (59%) had surgical intervention 281  
24  
25 during the acute event. 282

26  
27  
28  
29  
30 *Neurocognitive evaluation* 284

31  
32 The effect of HBOT on the patients' cognitive functions, as assessed by the eight 285  
33  
34 cognitive summary scores, is summarized in Table 2 and Figure-3. As can be seen, 286  
35  
36 HBOT induced significant improvements in all of the cognitive domains with a mean 287  
37  
38 change of  $4.6\pm 8.5$  ( $p<0.00001$ ). The most prominent improvement was in the memory 288  
39  
40 index, with  $8.1\pm 16.9$  ( $p<0.00001$ ), and in attention, with  $6.8\pm 16.5$  ( $p<0.0001$ ) (Table 289  
41  
42 2, Figure-3). 290

43  
44  
45  
46 The mild TBI group had the largest improvement in attention ( $8.8\pm 2.1$ ), followed by 291  
47  
48 memory ( $7.9\pm 2.3$ ). Patients in the moderate TBI group had noticeable improvements 292  
49  
50 in memory ( $11.1\pm 3.1$ ), followed by information processing speed ( $6.6\pm 3.5$ ). Lastly, 293  
51  
52 the severe TBI group had the largest improvement in memory ( $7.0\pm 2.0$ ), followed by 294  
53  
54 attention ( $6.3\pm 1.9$ ) (Figure-4). Using ANOVA analysis for repeated measures, there 295



1  
2  
3 were no significant differences in all cognitive domains improvements between the 296  
4 different TBI severity groups. 297  
5  
6

7  
8 The magnitude of the change in a cognitive score has different implications for 298  
9 patients at low or high baseline levels. Therefore, we further inspected the effect of 299  
10 HBOT on the relative changes, i.e., the changes relative to the baseline value, in each 300  
11 of the cognitive measured indexes. Marked improvements defined as >10% increase 301  
12 compared to baseline cognitive index were found, with different percentages, in all 302  
13 three study groups as summarized in Table 3. 303  
14  
15  
16  
17  
18  
19  
20  
21  
22

### 23 *Confounders* 305

24  
25 Relative change higher than 10% from baseline was considered a significant clinical 306  
26 improvement. Age, gender, education level, TBI severity, the time from injury to 307  
27 HBOT, HBOT protocol and number of sessions had no significant effect on the 308  
28 clinical improvement in the general, memory, attention, information processing speed 309  
29 and executive functions domains ( $p>0.05$ ). 310  
30  
31  
32  
33  
34  
35  
36  
37

### 38 *Metabolic imaging of the brain using SPECT* 312

39  
40  
41 One hundred patients had brain SPECT evaluations before and after HBOT. When 313  
42 calculating the mean relative change in each cortical Brodmann area for the entire 314  
43 cohort, the largest changes were in the anterior temporal tip areas (BA 38, BA 28, BA 315  
44 20) and in the prefrontal cortex (BA 10) (Figure-5). However, these changes were 316  
45 minor, in the range of 3-4% relative change. Further analysis per TBI severity group 317  
46 revealed several differences in Brodmann areas with involvement of the perirhinal 318  
47 cortex (BA 36) and the primary visual cortex (BA 18), as seen in Figure-6. 319  
48  
49  
50  
51  
52  
53  
54  
55  
56  
57  
58  
59  
60

1  
2  
3 To correlate SPECT imaging and cognitive changes, analysis was performed on the 320  
4 top twenty patients who had the largest cognitive improvement (>10% relative 321  
5 increase from baseline). There was a significantly larger magnitude of metabolism 322  
6 increase (5-8%), compared to the entire cohort average increase (2-4%) ( $p<0.05$ ). The 323  
7 most striking changes were found in the anterior cingulate (BA 24, ( $p=0.01$ )) and the 324  
8 post-central cortex (BA 5, ( $p=0.04$ )), in the prefrontal areas (BA 10 ( $p=0.04$ ), BA 11 325  
9 ( $p=0.07$ ), BA 46 ( $p=0.07$ ) and in the temporal areas (BA 20 ( $p=0.02$ ), BA 38 326  
10 ( $p=0.07$ ), BA 36 ( $p=0.1$ )). 327

### 28 ***Discussion*** 331

29  
30 The present study demonstrates the neurotherapeutic effects of HBOT for chronic TBI 332  
31 of all severities. Even though treatment started during late chronic stages (mean 333  
32 4.6±5.8 years, median 2.75 years) after the acute insult, HBOT was still found to be 334  
33 effective regardless of the TBI severity. The clinical improvements seen in all 335  
34 cognitive domains were well documented by objective computerized neurocognitive 336  
35 tests. The most significant measurable improvements were in memory, attention and 337  
36 executive function. We found the clinical improvement to be well correlated with 338  
37 increased brain activity in relevant brain areas, with significantly higher increases in 339  
38 patients with better cognitive improvements. 340

39  
40  
41 In addition to tissue oxygenation, numerous mechanisms of cellular and vascular 341  
42 repair by HBOT have been suggested in addition to tissue oxygenation.(5, 36) These 342  
43 include improved mitochondrial function and cellular metabolism, improved blood- 343

1  
2  
3 brain barrier and inflammatory reactions, reduced apoptosis, alleviation of oxidative 344  
4 stress, increased levels of neurotrophins and nitric oxide, and upregulation of axonal 345  
5 guidance agents.(5, 14, 37) Moreover, the effects of HBOT on neurons can be 346  
6 mediated indirectly by glial cells. HBOT may also promote neurogenesis of 347  
7 endogenous neural stem cells.(14, 37) The common denominator underlying all these 348  
8 mechanisms is that they are oxygen-dependent. HBOT may enable the metabolic 349  
9 change simply by supplying the missing energy/oxygen needed for these regeneration 350  
10 processes. (37) The induction of angiogenesis and improved brain metabolism, as 351  
11 demonstrated in this study, may serve as the infrastructure that enables the 352  
12 regenerative process and the preservation of newly generated neuronal functioning. 353  
13 (15, 36, 38) 354

14  
15  
16  
17  
18  
19  
20  
21  
22  
23  
24  
25  
26  
27  
28  
29 The correlation between specific cognitive function improvements with the metabolic 356  
30 brain imaging changes gives further strength to the study results and serves as an 357  
31 excellent tool for gaining better understanding of brain functionality (Figure-6): 358

- 32  
33  
34  
35  
36  
37  
38  
39  
40  
41  
42  
43  
44  
45  
46  
47  
48  
49  
50  
51  
52  
53  
54  
55  
56  
57  
58  
59  
60
- The perirhinal cortex activation after HBOT was most prominent in 359  
patients who had significant memory improvement. The perirhinal 360  
cortex has a critical role in object recognition memory while 361  
interacting with the hippocampus.(39) Since the memory assessments 362  
in the cognitive tests were indeed recognition tasks, this area is 363  
expected to be involved. 364
  - The pre-frontal cortex (BA 10, BA 11) and more specifically, the 365  
inferior frontal gyrus (BA 46, BA 47) activations after HBOT were 366  
prominent in all patients with significant executive function 367  
improvements. The right frontal gyrus is known to mediate a go/no go 368

1  
2  
3 task, (40) which was among the executive function tests used in the 369  
4  
5 present study. The prefrontal gyrus is presumed to act as a filtering 370  
6  
7 system that enhances goal directed activities and inhibits irrelevant 371  
8  
9 activations. This filtering mechanism enables executive control.(41) 372  
10  
11 • The anterior cingulate gyrus (BA 24) activation after HBOT was seen 373  
12  
13 in the subjects with attention improvement. The anterior cingulate 374  
14  
15 gyrus is presumed to be involved in error detection, especially in a 375  
16  
17 Stroop task,(42) which was used in the attention tests. Lesions in this 376  
18  
19 area can cause inattention to akinetic mutism.(42) 377  
20  
21  
22  
23  
24

25 This study has several limitations. The major one relates to its retrospective 379  
26  
27 methodology. This limitation is diminished when considering that this large cohort of 380  
28  
29 patients was treated at late chronic stages. The findings presented here are in 381  
30  
31 agreement and reinforce the findings from previous prospective controlled trials in 382  
32  
33 which the neuroplasticity effects of HBOT were demonstrated in chronic stages of 383  
34  
35 different types of brain injuries.(16, 22, 43, 44) Moreover, the correlation between the 384  
36  
37 changes in cognitive function and the metabolic brain imaging gives further strength 385  
38  
39 to the results. 386  
40  
41

42 Another important limitation relates to the HBOT protocol which was inconsistent 387  
43  
44 across the cohort. Although significant neurotherapeutic effects were seen with 60 388  
45  
46 minutes of 1.5 ATA, the optimal protocol needed to induce maximal neuroplasticity 389  
47  
48 for the specific individual, with minimal side effects has not been investigated. 390  
49  
50

51 391  
52  
53 The strengths of the study are worth mentioning. First, objective cognitive 392  
54  
55 assessments using computerized tests were performed on each patient both pre- and 393  
56  
57  
58  
59  
60

1  
2  
3 post-treatment. Objective measures are significantly superior to PCS questionnaires 394  
4 which are inaccurate, variable and contain various confounders rather than reflect the 395  
5 true PCS state.(45) Second, most of the patients in the study underwent an objective 396  
6 ancillary brain SPECT to confirm PCS diagnosis prior to HBOT. This practice is 397  
7 crucial when considering the differential diagnosis following TBI (PTSD, depression, 398  
8 etc.). 399

15 Moreover, post-treatment brain SPECTs revealed an anatomical-functional 400  
16 correlation in regards to HBOT's effect in brain neuroplasticity. Third, the study 401  
17 cohort consisted of a civilian population that does not have any potential secondary 402  
18 gain (such as financial compensation) by reporting sick. 403  
19  
20  
21  
22  
23

24  
25  
26 Previous studies included post-concussion syndrome patients who suffered mild TBI 405  
27 injury. Considering its strengths and limitations, the current study implies that the 406  
28 cognitive function of patients post TBI, can be improved significantly, irrespectively 407  
29 of whether the primary brain injury was classified as mild, moderate or severe. 408

30  
31 Although long term data is still lacking, considering the high safety profile of the 409  
32 treatment, these results are promising and should encourage rehabilitation centers to 410  
33 consider HBOT for patients with chronic neurocognitive deficits following TBI. 411

34  
35 Future studies should monitor these patients in the long term (6 months, 12 months) 412  
36 as well as their return to activities of daily living. 413  
37  
38  
39

#### 40 **Conclusions** 414

41  
42 HBOT was associated with significant cognitive improvements in patients who suffer 415  
43 from chronic neurocognitive deficits due to mild, moderate and severe TBI. 416  
44 Improvement in memory correlated with activation of the perirhinal cortex, 417  
45 improvement of executive functions correlated with activation of the inferior frontal 418  
46  
47  
48  
49  
50  
51  
52  
53  
54  
55  
56  
57  
58  
59  
60

1  
2  
3 gyrus, and improvement in attention correlated with activation of the anterior 419  
4  
5 cingulate gyrus. 420  
6  
7 421  
8  
9  
10 422  
11  
12  
13 423  
14  
15  
16 424  
17  
18  
19 425  
20  
21  
22 426  
23  
24  
25 427  
26  
27  
28 428  
29  
30  
31 429  
32  
33  
34 430  
35  
36 431  
37  
38  
39 432  
40  
41  
42 433  
43  
44  
45 434  
46  
47  
48 435  
49  
50  
51 436  
52  
53  
54 437  
55  
56  
57  
58  
59  
60

## References

438

1. Coronado VG, Xu L, Basavaraju SV, McGuire LC, Wald MM, Faul MD, et al. Surveillance for traumatic brain injury-related deaths--United States, 1997-2007. *MMWR Surveill Summ.* 2011;60(5):1-32. Epub 2011/05/06. PubMed PMID: 21544045. 439-441
2. Bazarian JJ, Wong T, Harris M, Leahey N, Mookerjee S, Dombovy M. Epidemiology and predictors of post-concussive syndrome after minor head injury in an emergency population. *Brain injury : [BI].* 1999;13(3):173-89. PubMed PMID: 10081599. 442-444
3. Kashluba S, Paniak C, Blake T, Reynolds S, Toller-Lobe G, Nagy J. A longitudinal, controlled study of patient complaints following treated mild traumatic brain injury. *Archives of clinical neuropsychology : the official journal of the National Academy of Neuropsychologists.* 2004;19(6):805-16. doi: 10.1016/j.acn.2003.09.005. PubMed PMID: 15288333. 445-449
4. Figueroa XA, Wright JK. Hyperbaric oxygen: B-level evidence in mild traumatic brain injury clinical trials. *Neurology.* 2016;87(13):1400-6. Epub 2016/09/02. doi: 10.1212/WNL.0000000000003146. PubMed PMID: 27581219. 450-452
5. Efrati S, Ben-Jacob E. Reflections on the neurotherapeutic effects of hyperbaric oxygen. *Expert review of neurotherapeutics.* 2014;14(3):233-6. doi: 10.1586/14737175.2014.884928. PubMed PMID: 24471697. 453-455
6. Tal S, Hadanny A, Sasson E, Suzin G, Efrati S. Hyperbaric Oxygen Therapy Can Induce Angiogenesis and Regeneration of Nerve Fibers in Traumatic Brain Injury Patients. *Frontiers in human neuroscience.* 2017;11:508. doi: 10.3389/fnhum.2017.00508. PubMed PMID: 29097988; PubMed Central PMCID: PMC5654341. 456-459
7. Medana IM, Esiri MM. Axonal damage: a key predictor of outcome in human CNS diseases. *Brain.* 2003;126(Pt 3):515-30. Epub 2003/02/05. PubMed PMID: 12566274. 460-461
8. Kochanek PM, Clark, R.S.B., & Jenkins, L.W. TBI :Pathobiology. In: Zasler ND, Katz, D.I., Zafonte, R.D., editor. *Brain injury medicine.* NY: Demos medical publishing; 2007. p. 81-92. 462-464
9. Kushner D. Mild traumatic brain injury: toward understanding manifestations and treatment. *Arch Intern Med.* 1998;158(15):1617-24. Epub 1998/08/13. PubMed PMID: 9701095. 465-467
10. Sohlberg MM, Mateer CA. *Cognitive Rehabilitation: An Integrative Neuropsychological Approach.* NY: The Guilford Press; 2001. 468-469
11. Kim J, Whyte J, Patel S, Avants B, Europa E, Wang J, et al. Resting cerebral blood flow alterations in chronic traumatic brain injury: an arterial spin labeling perfusion fMRI study. *Journal of neurotrauma.* 2010;27(8):1399-411. doi: 10.1089/neu.2009.1215. PubMed PMID: 20528163; PubMed Central PMCID: PMC2967826. 470-473
12. Ostergaard L, Engedal TS, Aamand R, Mikkelsen R, Iversen NK, Anzabi M, et al. Capillary transit time heterogeneity and flow-metabolism coupling after traumatic brain injury. *Journal of cerebral blood flow and metabolism : official journal of the International Society of Cerebral Blood Flow and Metabolism.* 2014;34(10):1585-98. doi: 10.1038/jcbfm.2014.131. PubMed PMID: 25052556; PubMed Central PMCID: PMC4269727. 474-478
13. Stein SC, Graham DI, Chen XH, Smith DH. Association between intravascular microthrombosis and cerebral ischemia in traumatic brain injury. *Neurosurgery.* 2004;54(3):687-91; discussion 91. PubMed PMID: 15028145. 479-481
14. Efrati S, Ben-Jacob E. Reflections on the neurotherapeutic effects of hyperbaric oxygen. *Expert Rev Neurother.* 2014;14(3):233-6. Epub 2014/01/30. doi: 10.1586/14737175.2014.884928. PubMed PMID: 24471697. 482-484
15. Jiang Q, Zhang ZG, Ding GL, Zhang L, Ewing JR, Wang L, et al. Investigation of neural progenitor cell induced angiogenesis after embolic stroke in rat using MRI. *NeuroImage.* 2005;28(3):698-707. doi: 10.1016/j.neuroimage.2005.06.063. PubMed PMID: 16112879. 485-487



- 1  
2  
3 16. Tal S, Hadanny A, Berkovitz N, Sasson E, Ben-Jacob E, Efrati S. Hyperbaric oxygen 488  
4 may induce angiogenesis in patients suffering from prolonged post-concussion syndrome 489  
5 due to traumatic brain injury. *Restor Neurol Neurosci*. 2015;33(6):943-51. doi: 10.3233/RNN- 490  
6 150585. PubMed PMID: 26484702. 491  
7 17. Wolf G, Cifu D, Baugh L, Carne W, Profenna L. The effect of hyperbaric oxygen on 492  
8 symptoms after mild traumatic brain injury. *Journal of neurotrauma*. 2012;29(17):2606-12. 493  
9 doi: 10.1089/neu.2012.2549. PubMed PMID: 23031217. 494  
10 18. Cifu DX, Hoke KW, Wetzel PA, Wares JR, Gitchel G, Carne W. Effects of hyperbaric 495  
11 oxygen on eye tracking abnormalities in males after mild traumatic brain injury. *Journal of* 496  
12 *rehabilitation research and development*. 2014;51(7):1047-56. doi: 497  
13 10.1682/JRRD.2014.01.0013. PubMed PMID: 25436771. 498  
14 19. Miller RS, Weaver LK, Bahraini N, Churchill S, Price RC, Skiba V, et al. Effects of 499  
15 hyperbaric oxygen on symptoms and quality of life among service members with persistent 500  
16 postconcussion symptoms: a randomized clinical trial. *JAMA internal medicine*. 501  
17 2015;175(1):43-52. doi: 10.1001/jamainternmed.2014.5479. PubMed PMID: 25401463. 502  
18 20. Smith-Seemiller L, Fow NR, Kant R, Franzen MD. Presence of post-concussion 503  
19 syndrome symptoms in patients with chronic pain vs mild traumatic brain injury. *Brain* 504  
20 *injury*. 2003;17(3):199-206. PubMed PMID: 12623496. 505  
21 21. Hadanny A, Efrati S. Treatment of persistent post-concussion syndrome due to mild 506  
22 traumatic brain injury: current status and future directions. *Expert Rev Neurother*. 507  
23 2016;16(8):875-87. doi: 10.1080/14737175.2016.1205487. PubMed PMID: 27337294. 508  
24 22. Boussi-Gross R, Golan H, Fishlev G, Bechor Y, Volkov O, Bergan J, et al. Hyperbaric 509  
25 oxygen therapy can improve post concussion syndrome years after mild traumatic brain 510  
26 injury - randomized prospective trial. *PLoS One*. 2013;8(11):e79995. doi: 511  
27 10.1371/journal.pone.0079995. PubMed PMID: 24260334; PubMed Central PMCID: 512  
28 PMCPC3829860. 513  
29 23. Efrati S, Ben-Jacob E. How and why hyperbaric oxygen therapy can bring new hope 514  
30 for children suffering from cerebral palsy--an editorial perspective. *Undersea & hyperbaric* 515  
31 *medicine : journal of the Undersea and Hyperbaric Medical Society, Inc*. 2014;41(2):71-6. 516  
32 PubMed PMID: 24851543. 517  
33 24. Etzion Y, Grossman Y. Pressure-induced depression of synaptic transmission in the 518  
34 cerebellar parallel fibre synapse involves suppression of presynaptic N-type Ca<sup>2+</sup> channels. 519  
35 *Eur J Neurosci*. 2000;12(11):4007-16. Epub 2000/11/09. PubMed PMID: 11069597. 520  
36 25. Berman S, Abu Hamad R, Efrati S. Mesangial cells are responsible for orchestrating 521  
37 the renal podocytes injury in the context of malignant hypertension. *Nephrology (Carlton)*. 522  
38 2013;18(4):292-8. Epub 2013/03/01. doi: 10.1111/nep.12043. PubMed PMID: 23445449. 523  
39 26. Fujita N, Ono M, Tomioka T, Deie M. Effects of hyperbaric oxygen at 1.25 524  
40 atmospheres absolute with normal air on macrophage number and infiltration during rat 525  
41 skeletal muscle regeneration. *PloS one*. 2014;9(12):e115685. doi: 526  
42 10.1371/journal.pone.0115685. PubMed PMID: 25531909; PubMed Central PMCID: 527  
43 PMC4274106. 528  
44 27. Takemura A, Ishihara A. Mild Hyperbaric Oxygen Inhibits Growth-related Decrease in 529  
45 Muscle Oxidative Capacity of Rats with Metabolic Syndrome. *Journal of atherosclerosis and* 530  
46 *thrombosis*. 2017;24(1):26-38. doi: 10.5551/jat.34686. PubMed PMID: 27237220; PubMed 531  
47 Central PMCID: PMC5225130. 532  
48 28. Bhutani S, Vishwanath G. Hyperbaric oxygen and wound healing. *Indian journal of* 533  
49 *plastic surgery : official publication of the Association of Plastic Surgeons of India*. 534  
50 2012;45(2):316-24. doi: 10.4103/0970-0358.101309. PubMed PMID: 23162231; PubMed 535  
51 Central PMCID: PMC3495382. 536  
52  
53  
54  
55  
56  
57  
58  
59  
60



1  
2  
3  
4  
5  
6  
7  
8  
9  
10  
11  
12  
13  
14  
15  
16  
17  
18  
19  
20  
21  
22  
23  
24  
25  
26  
27  
28  
29  
30  
31  
32  
33  
34  
35  
36  
37  
38  
39  
40  
41  
42  
43  
44  
45  
46  
47  
48  
49  
50  
51  
52  
53  
54  
55  
56  
57  
58  
59  
60

29. Malec JF, Brown AW, Leibson CL, Flaada JT, Mandrekar JN, Diehl NN, et al. The mayo classification system for traumatic brain injury severity. *Journal of neurotrauma*. 2007;24(9):1417-24. doi: 10.1089/neu.2006.0245. PubMed PMID: 17892404. 537  
538
30. Dwolatzky T, Whitehead V, Doniger GM, Simon ES, Schweiger A, Jaffe D, et al. Validity of a novel computerized cognitive battery for mild cognitive impairment. *BMC geriatrics*. 2003;3:4. doi: 10.1186/1471-2318-3-4. PubMed PMID: 14594456; PubMed Central PMCID: PMC270050. 540  
541  
542  
543
31. Zur D, Naftaliev E, Kesler A. Evidence of Multidomain Mild Cognitive Impairment in Idiopathic Intracranial Hypertension. *Journal of neuro-ophthalmology : the official journal of the North American Neuro-Ophthalmology Society*. 2014. doi: 10.1097/WNO.0000000000000199. PubMed PMID: 25383589. 544  
545  
546  
547
32. Doniger GM. Guide to Normative Data 2014 [cited 2014 July, 16th]. Available from: [http://www1.neurotrax.com/docs/norms\\_guide.pdf](http://www1.neurotrax.com/docs/norms_guide.pdf). 548  
549
33. Melton JL. Psychometric evaluation of the Mindstreams neuropsychological screening tool. Panama City (FL): Navy Experimental Diving Unit (US), 2005 NEDU TR. 550  
551
34. A. Schweiger GMD, T. Dwolatzky, D. Jaffe, E.S. Simon RELIABILITY OF A NOVEL COMPUTERIZED NEUROPSYCHOLOGICAL BATTERY FOR MILD COGNITIVE IMPAIRMENT. *ACTA NEUROPSYCHOLOGICA*. 2003;1(4):407-13. 552  
553  
554
35. Jaszczak RJ, Chang LT, Stein NA, Moore FE. Whole-body single-photon emission computed tomography using dual, large-field-of-view scintillation cameras. *Physics in medicine and biology*. 1979;24(6):1123-43. PubMed PMID: 316897. 555  
556  
557
36. Hadanny A, Golan H, Fishlev G, Bechor Y, Volkov O, Suzin G, et al. Hyperbaric oxygen can induce neuroplasticity and improve cognitive functions of patients suffering from anoxic brain damage. *Restorative neurology and neuroscience*. 2015;33(4):471-86. doi: 10.3233/RNN-150517. PubMed PMID: 26409406; PubMed Central PMCID: PMC4923708. 558  
559  
560  
561
37. Efrati S, Fishlev G, Bechor Y, Volkov O, Bergan J, Kliakhandler K, et al. Hyperbaric oxygen induces late neuroplasticity in post stroke patients--randomized, prospective trial. *PloS one*. 2013;8(1):e53716. doi: 10.1371/journal.pone.0053716. PubMed PMID: 23335971; PubMed Central PMCID: PMC3546039. 562  
563  
564  
565
38. Chen J, Zhang ZG, Li Y, Wang L, Xu YX, Gautam SC, et al. Intravenous administration of human bone marrow stromal cells induces angiogenesis in the ischemic boundary zone after stroke in rats. *Circ Res*. 2003;92(6):692-9. Epub 2003/03/01. doi: 10.1161/01.RES.0000063425.51108.8D. PubMed PMID: 12609969. 566  
567  
568  
569
39. Brown MW, Aggleton JP. Recognition memory: what are the roles of the perirhinal cortex and hippocampus? *Nature reviews Neuroscience*. 2001;2(1):51-61. doi: 10.1038/35049064. PubMed PMID: 11253359. 570  
571  
572
40. Aron AR, Robbins TW, Poldrack RA. Inhibition and the right inferior frontal cortex. *Trends in cognitive sciences*. 2004;8(4):170-7. doi: 10.1016/j.tics.2004.02.010. PubMed PMID: 15050513. 573  
574  
575
41. Miller EK, Cohen JD. An integrative theory of prefrontal cortex function. *Annual review of neuroscience*. 2001;24:167-202. doi: 10.1146/annurev.neuro.24.1.167. PubMed PMID: 11283309. 576  
577  
578
42. Bush G, Luu P, Posner MI. Cognitive and emotional influences in anterior cingulate cortex. *Trends in cognitive sciences*. 2000;4(6):215-22. PubMed PMID: 10827444. 579  
580
43. Harch PG. Hyperbaric oxygen in chronic traumatic brain injury: oxygen, pressure, and gene therapy. *Medical gas research*. 2015;5:9. doi: 10.1186/s13618-015-0030-6. PubMed PMID: 26171141; PubMed Central PMCID: PMC4499900. 581  
582  
583
44. Harch PG, Andrews SR, Fogarty EF, Amen D, Pezzullo JC, Lucarini J, et al. A phase I study of low-pressure hyperbaric oxygen therapy for blast-induced post-concussion syndrome and post-traumatic stress disorder. *Journal of neurotrauma*. 2012;29(1):168-85. doi: 10.1089/neu.2011.1895. PubMed PMID: 22026588. 584  
585  
586  
587

1  
2  
3 45. Potter S, Leigh E, Wade D, Fleminger S. The Rivermead Post Concussion Symptoms 588  
4 Questionnaire: a confirmatory factor analysis. Journal of neurology. 2006;253(12):1603-14. 589  
5 doi: 10.1007/s00415-006-0275-z. PubMed PMID: 17063314. 590

6  
7 591

8  
9 592

10  
11 593

12  
13 594  
14  
15  
16  
17  
18  
19  
20  
21  
22  
23  
24  
25  
26  
27  
28  
29  
30  
31  
32  
33  
34  
35  
36  
37  
38  
39  
40  
41  
42  
43  
44  
45  
46  
47  
48  
49  
50  
51  
52  
53  
54  
55  
56  
57  
58  
59  
60

Table 1: Baseline patient characteristics.

595

| Characteristics           | Total      | Mild TBI   | Moderate TBI | Severe TBI | Significance       |
|---------------------------|------------|------------|--------------|------------|--------------------|
| <b>Number of patients</b> | 154 (100%) | 69 (44.8%) | 24 (15.6%)   | 61 (39.6%) |                    |
| <b>Age (years)</b>        | 42.7±14.6  | 48.8±12.0  | 41.7±12.7    | 36.2±15.3  | <b>P&lt;0.0001</b> |
| <b>Sex</b>                |            |            |              |            |                    |
| Males                     | 90 (58.4%) | 31 (44.9%) | 13 (54.2%)   | 46 (75.4%) | <b>P=0.002</b>     |
| Females                   | 64 (41.6%) | 38 (55.1%) | 11 (45.8%)   | 15 (24.6%) |                    |
| <b>Education (years)</b>  | 14.8±3.3   | 14.9±3.6   | 14.9±3.3     | 14.6±3.1   | P=0.895            |
| <b>Traumatic event</b>    |            |            |              |            |                    |

|  |                                 |             |            |            |            |                |
|--|---------------------------------|-------------|------------|------------|------------|----------------|
|  | Motor Vehicle                   |             |            |            |            |                |
|  | Accident                        | 116 (75.3%) | 56 (81.2%) | 17 (70.8%) | 43 (70.5%) | <b>P=0.048</b> |
|  | Fall                            | 21 (13.6%)  | 8 (11.6%)  | 1 (4.2%)   | 12 (57.1%) |                |
|  | Blow                            | 12 (7.8%)   | 5 (7.2%)   | 5 (20.8%)  | 2 (3.3%)   |                |
|  | Blast                           | 4 (2.6%)    | 0          | 1 (4.2%)   | 3 (4.9%)   |                |
|  | Penetrating                     | 1 (0.6%)    | 0          | 0          | 1 (0.6%)   |                |
|  | <b>Time from trauma (years)</b> | 4.6±5.8     | 4.4±5.9    | 5.0±5.8    | 4.6±5.7    | <b>P=0.923</b> |

596

597

Table 1: Baseline patient characteristics (continued).

598

| Characteristics     | Total       | Mild TBI   | Moderate TBI | Severe TBI | Significance       |
|---------------------|-------------|------------|--------------|------------|--------------------|
| <b>Symptoms</b>     |             |            |              |            |                    |
| Cognitive           | 100 (86.2%) | 38 (74.5%) | 19 (90.5%)   | 43 (97.7%) | <b>P=0.004</b>     |
| Motor               | 22 (19.0%)  | 1 (4.8%)   | 1 (4.8%)     | 20 (45.5%) | <b>P&lt;0.0001</b> |
| Sensory             | 32 (27.6%)  | 12 (23.5%) | 7 (33.3%)    | 13 (29.5%) | P=0.653            |
| Dizziness/Vertigo   | 17 (14.7%)  | 14 (27.5%) | 2 (9.5%)     | 1 (2.3%)   | <b>P=0.002</b>     |
| Tinnitus            | 30 (25.9%)  | 26 (51.0%) | 2 (9.5%)     | 2 (4.5%)   | <b>P&lt;0.0001</b> |
| Headaches           | 20 (17.2%)  | 12 (23.5%) | 3 (14.3%)    | 5 (11.4%)  | P=0.272            |
| <b>HBO sessions</b> | 52.0±9.9    | 49.4±10.1  | 49.0±10.3    | 56.1±8.2   | <b>P=0.0001</b>    |

1  
2  
3  
4  
5  
6  
7  
8  
9  
10  
11  
12  
13  
14  
15  
16  
17  
18  
19  
20  
21  
22  
23  
24  
25  
26  
27  
28  
29  
30  
31  
32  
33  
34  
35  
36  
37  
38  
39  
40  
41  
42  
43  
44  
45  
46  
47

|                           |     |             |            |            |            |         |
|---------------------------|-----|-------------|------------|------------|------------|---------|
| <b>HBO protocol (ATA)</b> | 1.5 | 106 (69.3%) | 46 (67.6%) | 18 (75.0%) | 42 (68.9%) | P=0.795 |
|                           | 2   | 47 (30.7%)  | 22 (32.4%) | 6 (25.0%)  | 19 (31.1%) |         |
| <b>Adverse Events</b>     |     | 18 (12.0%)  | 10 (15.2%) | 3 (12.5%)  | 5 (8.3%)   | P=0.499 |

For peer review only

599  
600  
601  
602  
603  
604  
605  
606  
607  
608

Table 2: Cognitive indices pre- and post-HBOT of the entire study cohort

609

610

|                     | <b>Baseline</b> | <b>Post HBOT</b> | <b>Mean Change</b> | <b>P-Value</b>     |
|---------------------|-----------------|------------------|--------------------|--------------------|
| General             | 88.3±15.2       | 92.9±14.2        | 4.6±8.5            | <b>P&lt;0.0001</b> |
| Memory              | 81.7±23.2       | 89.9±21.9        | 8.1±16.9           | <b>P&lt;0.0001</b> |
| Executive Functions | 88.3±16.6       | 94.2±15.1        | 5.9±12.0           | <b>P&lt;0.0001</b> |
| Attention           | 84.3±20.5       | 91.1±18.4        | 6.8±16.5           | <b>P&lt;0.0001</b> |
| IPS                 | 87.5±17.0       | 92.4±15.7        | 4.9±13.1           | <b>P&lt;0.0001</b> |

|              |           |           |          |                    |
|--------------|-----------|-----------|----------|--------------------|
| VSP          | 95.0±18.0 | 98.5±18.0 | 3.4±14.6 | <b>P=0.005</b>     |
| Motor skills | 92.3±17.3 | 96.2±14.5 | 3.9±11.7 | <b>P&lt;0.0001</b> |

611

612

IPS=information processing speed, VSP=visual spatial processing

613

614

615

616

617

618

619

620

621

622



623

1  
2  
3  
4  
5  
6  
7  
8  
9  
10  
11  
12  
13  
14  
15  
16  
17  
18  
19  
20  
21  
22  
23  
24  
25  
26  
27  
28  
29  
30  
31  
32  
33  
34  
35  
36  
37  
38  
39  
40  
41  
42  
43  
44  
45  
46  
47

Table 3: Large significant increases (>10% change) in cognitive indices proportions across TBI groups.

624

|                              | Total      | Mild TBI   | Moderate TBI | Severe TBI |                |
|------------------------------|------------|------------|--------------|------------|----------------|
| General                      | 36 (23.4%) | 15 (21.7%) | 7(29.2%)     | 14 (23.0%) | P=0.756        |
| Memory                       | 64 (41.6%) | 28 (40.6%) | 9 (37.5%)    | 27 (44.3%) | P=0.830        |
| Executive functions          | 51 (33.1%) | 23 (33.3%) | 7 (29.2%)    | 21 (34.9%) | P=0.897        |
| Attention                    | 62 (40.3%) | 27 (39.1%) | 8 (33.3%)    | 27 (44.3%) | P=0.631        |
| Information processing speed | 48 (31.2%) | 23 (33.3%) | 12 (50%)     | 13 (21.3%) | <b>P=0.032</b> |

625

626

For peer review only

1  
2  
3  
4  
5  
6  
7  
8  
9  
10  
11  
12  
13  
14  
15  
16  
17  
18  
19  
20  
21  
22  
23  
24  
25  
26  
27  
28  
29  
30  
31  
32  
33  
34  
35  
36  
37  
38  
39  
40  
41  
42  
43  
44  
45  
46  
47

|    |                                                                                    |     |
|----|------------------------------------------------------------------------------------|-----|
| 1  |                                                                                    |     |
| 2  |                                                                                    |     |
| 3  | <b>Figures legends</b>                                                             | 628 |
| 4  |                                                                                    |     |
| 5  | Figure-1: Patients flowchart.                                                      | 629 |
| 6  |                                                                                    |     |
| 7  | Figure-2: Imaging findings in the severe TBI group                                 | 630 |
| 8  |                                                                                    |     |
| 9  | Figure-3: Mean changes of post- compared to pre-HBOT for the entire cohort.        | 631 |
| 10 |                                                                                    |     |
| 11 |                                                                                    |     |
| 12 | After HBOT, all cognitive domains improved significantly, with the most striking   | 632 |
| 13 |                                                                                    |     |
| 14 | changes seen in memory and attention.                                              | 633 |
| 15 |                                                                                    |     |
| 16 |                                                                                    |     |
| 17 | *p<0.0001, **p=0.005, IPS=information processing speed                             | 634 |
| 18 |                                                                                    |     |
| 19 |                                                                                    |     |
| 20 | Figure-4: Mean changes of post- compared to pre-HBOT across the different TBI      | 635 |
| 21 |                                                                                    |     |
| 22 | severities.                                                                        | 636 |
| 23 |                                                                                    |     |
| 24 |                                                                                    |     |
| 25 | Both patients who suffered mild and severe TBI groups had improvements in general, | 637 |
| 26 |                                                                                    |     |
| 27 | memory, attention, information processing speed and motor skills scores, whereas   | 638 |
| 28 |                                                                                    |     |
| 29 | patients who suffered moderate TBI had significant improvement in memory.          | 639 |
| 30 |                                                                                    |     |
| 31 |                                                                                    |     |
| 32 | *p<0.05, IPS =information processing speed                                         | 640 |
| 33 |                                                                                    |     |
| 34 |                                                                                    |     |
| 35 | Figure-5: The mean relative change in Brodmann areas post HBOT for the entire      | 641 |
| 36 |                                                                                    |     |
| 37 | study cohort.                                                                      | 642 |
| 38 |                                                                                    |     |
| 39 |                                                                                    |     |
| 40 | Figure-6: Cognitive functions correlated with Brodmann areas.                      | 643 |
| 41 |                                                                                    |     |
| 42 |                                                                                    |     |
| 43 |                                                                                    |     |
| 44 | Each of the TBI groups(mild, moderate and severe) had perfusion/metabolism         | 644 |
| 45 |                                                                                    |     |
| 46 | increase in specific Brodmann areas correlated with improved cognitive function.   | 645 |
| 47 |                                                                                    |     |
| 48 |                                                                                    |     |
| 49 |                                                                                    | 646 |
| 50 |                                                                                    |     |
| 51 |                                                                                    |     |
| 52 |                                                                                    |     |
| 53 |                                                                                    |     |
| 54 |                                                                                    |     |
| 55 |                                                                                    |     |
| 56 |                                                                                    |     |
| 57 |                                                                                    |     |
| 58 |                                                                                    |     |
| 59 |                                                                                    |     |
| 60 |                                                                                    |     |



Patients flowchart

334x232mm (300 x 300 DPI)

iew only

1  
2  
3  
4  
5  
6  
7  
8  
9  
10  
11  
12  
13  
14  
15  
16  
17  
18  
19  
20  
21  
22  
23  
24  
25  
26  
27  
28  
29  
30  
31  
32  
33  
34  
35  
36  
37  
38  
39  
40  
41  
42  
43  
44  
45  
46  
47  
48  
49  
50  
51  
52  
53  
54  
55  
56  
57  
58  
59  
60



Imaging findings in the severe TBI subgroup

230x154mm (300 x 300 DPI)

view only



Mean changes of post- compared to pre-HBOT for the entire cohort. After HBOT, all cognitive domains improved significantly, where the most striking changes were seen in memory and attention.

\*p<0.0001, \*\*p=0.005, IPS=information processing speed

204x77mm (300 x 300 DPI)

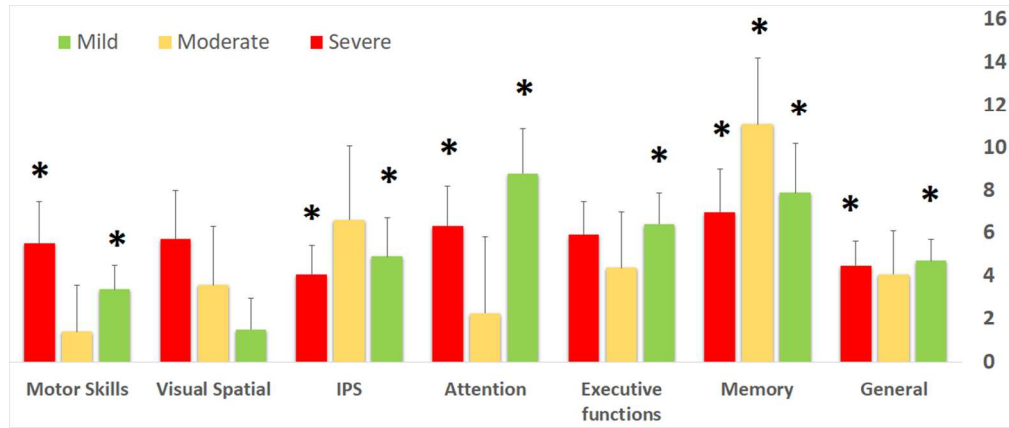

Mean changes of post- compared to pre-HBOT across the different TBI severities.

Both patients who suffered mild and severe TBI groups had improvements in general, memory, attention, information processing speed and motor skills scores, whereas patients who suffered moderate TBI had significant improvement in memory.

\* $p < 0.05$ , IPS = information processing speed

247x104mm (120 x 120 DPI)

1  
2  
3  
4  
5  
6  
7  
8  
9  
10  
11  
12  
13  
14  
15  
16  
17  
18  
19  
20  
21  
22  
23  
24  
25  
26  
27  
28  
29  
30  
31  
32  
33  
34  
35  
36  
37  
38  
39  
40  
41  
42  
43  
44  
45  
46  
47  
48  
49  
50  
51  
52  
53  
54  
55  
56  
57  
58  
59  
60

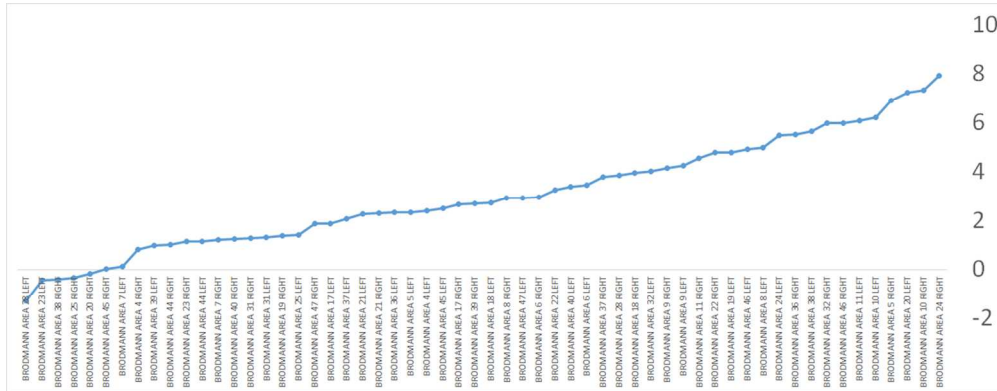

The mean relative change in broadmann areas post HBOT for the entire study cohort

261x101mm (300 x 300 DPI)

Peer review only



1  
2  
3  
4  
5  
6  
7  
8  
9  
10  
11  
12  
13  
14  
15  
16  
17  
18  
19  
20  
21  
22  
23  
24  
25  
26  
27  
28  
29  
30  
31  
32  
33  
34  
35  
36  
37  
38  
39  
40  
41  
42  
43  
44  
45  
46  
47  
48  
49  
50  
51  
52  
53  
54  
55  
56  
57  
58  
59  
60

Mild TBI

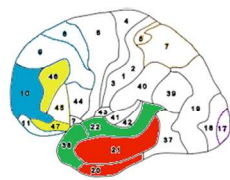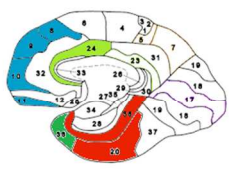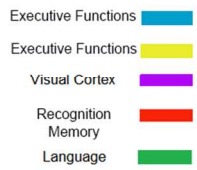

Moderate TBI

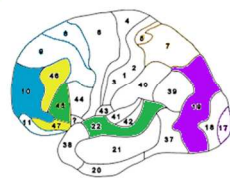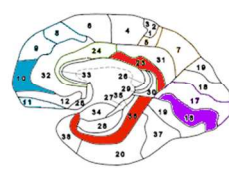

Severe TBI

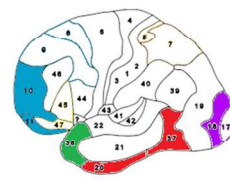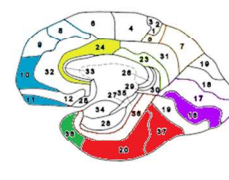

Cognitive functions correlated with Brodmann areas.  
Each of the TBI severities (mild, moderate and severe) had perfusion/metabolism increase in specific Brodmann areas correlated with improved cognitive function

240x173mm (300 x 300 DPI)

view only

## STROBE (Strengthening The Reporting of OBServational Studies in Epidemiology) Checklist

A checklist of items that should be included in reports of observational studies. You must report the page number in your manuscript where you consider each of the items listed in this checklist. If you have not included this information, either revise your manuscript accordingly before submitting or note N/A.

**Note:** An Explanation and Elaboration article discusses each checklist item and gives methodological background and published examples of transparent reporting. The STROBE checklist is best used in conjunction with this article (freely available on the Web sites of PLoS Medicine at <http://www.plosmedicine.org/>, Annals of Internal Medicine at <http://www.annals.org/>, and Epidemiology at <http://www.epidem.com/>). Information on the STROBE Initiative is available at [www.strobe-statement.org](http://www.strobe-statement.org).

| Section and Item     | Item No. | Recommendation                                                                                                                                                                                                                                                                                                                                                                                                                                                                 | Reported on Page No. |
|----------------------|----------|--------------------------------------------------------------------------------------------------------------------------------------------------------------------------------------------------------------------------------------------------------------------------------------------------------------------------------------------------------------------------------------------------------------------------------------------------------------------------------|----------------------|
| Title and Abstract   | 1        | (a) Indicate the study's design with a commonly used term in the title or the abstract                                                                                                                                                                                                                                                                                                                                                                                         |                      |
|                      |          | (b) Provide in the abstract an informative and balanced summary of what was done and what was found                                                                                                                                                                                                                                                                                                                                                                            |                      |
| <b>Introduction</b>  |          |                                                                                                                                                                                                                                                                                                                                                                                                                                                                                |                      |
| Background/Rationale | 2        | Explain the scientific background and rationale for the investigation being reported                                                                                                                                                                                                                                                                                                                                                                                           |                      |
| Objectives           | 3        | State specific objectives, including any prespecified hypotheses                                                                                                                                                                                                                                                                                                                                                                                                               |                      |
| <b>Methods</b>       |          |                                                                                                                                                                                                                                                                                                                                                                                                                                                                                |                      |
| Study Design         | 4        | Present key elements of study design early in the paper                                                                                                                                                                                                                                                                                                                                                                                                                        |                      |
| Setting              | 5        | Describe the setting, locations, and relevant dates, including periods of recruitment, exposure, follow-up, and data collection                                                                                                                                                                                                                                                                                                                                                |                      |
| Participants         | 6        | (a) <i>Cohort study</i> —Give the eligibility criteria, and the sources and methods of selection of participants. Describe methods of follow-up<br><br><i>Case-control study</i> —Give the eligibility criteria, and the sources and methods of case ascertainment and control selection. Give the rationale for the choice of cases and controls<br><br><i>Cross-sectional study</i> —Give the eligibility criteria, and the sources and methods of selection of participants |                      |
|                      |          | (b) <i>Cohort study</i> —For matched studies, give matching criteria and number of exposed and unexposed<br><br><i>Case-control study</i> —For matched studies, give matching criteria and the number of controls per case                                                                                                                                                                                                                                                     |                      |
| Variables            | 7        | Clearly define all outcomes, exposures, predictors, potential confounders, and effect modifiers. Give diagnostic criteria, if applicable                                                                                                                                                                                                                                                                                                                                       |                      |

| Section and Item             | Item No. | Recommendation                                                                                                                                                                                                                                                                                                    | Reported on Page No. |
|------------------------------|----------|-------------------------------------------------------------------------------------------------------------------------------------------------------------------------------------------------------------------------------------------------------------------------------------------------------------------|----------------------|
| Data Sources/<br>Measurement | 8*       | For each variable of interest, give sources of data and details of methods of assessment (measurement). Describe comparability of assessment methods if there is more than one group                                                                                                                              |                      |
| Bias                         | 9        | Describe any efforts to address potential sources of bias                                                                                                                                                                                                                                                         |                      |
| Study Size                   | 10       | Explain how the study size was arrived at                                                                                                                                                                                                                                                                         |                      |
| Quantitative Variables       | 11       | Explain how quantitative variables were handled in the analyses. If applicable, describe which groupings were chosen and why                                                                                                                                                                                      |                      |
| Statistical Methods          | 12       | (a) Describe all statistical methods, including those used to control for confounding                                                                                                                                                                                                                             |                      |
|                              |          | (b) Describe any methods used to examine subgroups and interactions                                                                                                                                                                                                                                               |                      |
|                              |          | (c) Explain how missing data were addressed                                                                                                                                                                                                                                                                       |                      |
|                              |          | (d) <i>Cohort study</i> —If applicable, explain how loss to follow-up was addressed<br><br><i>Case-control study</i> —If applicable, explain how matching of cases and controls was addressed<br><br><i>Cross-sectional study</i> —If applicable, describe analytical methods taking account of sampling strategy |                      |
|                              |          | (e) Describe any sensitivity analyses                                                                                                                                                                                                                                                                             |                      |
| <b>Results</b>               |          |                                                                                                                                                                                                                                                                                                                   |                      |
| Participants                 | 13*      | (a) Report numbers of individuals at each stage of study—eg numbers potentially eligible, examined for eligibility, confirmed eligible, included in the study, completing follow-up, and analysed                                                                                                                 |                      |
|                              |          | (b) Give reasons for non-participation at each stage                                                                                                                                                                                                                                                              |                      |
|                              |          | (c) Consider use of a flow diagram                                                                                                                                                                                                                                                                                |                      |
| Descriptive Data             | 14*      | (a) Give characteristics of study participants (eg demographic, clinical, social) and information on exposures and potential confounders                                                                                                                                                                          |                      |
|                              |          | (b) Indicate number of participants with missing data for each variable of interest                                                                                                                                                                                                                               |                      |
|                              |          | (c) <i>Cohort study</i> —Summarise follow-up time (eg, average and total amount)                                                                                                                                                                                                                                  |                      |
| Outcome Data                 | 15*      | <i>Cohort study</i> —Report numbers of outcome events or summary measures over time                                                                                                                                                                                                                               |                      |
|                              |          | <i>Case-control study</i> —Report numbers in each exposure category, or summary measures of exposure                                                                                                                                                                                                              |                      |
|                              |          | <i>Cross-sectional study</i> —Report numbers of outcome events or summary measures                                                                                                                                                                                                                                |                      |

| Section and Item         | Item No. | Recommendation                                                                                                                                                                                               | Reported on Page No. |
|--------------------------|----------|--------------------------------------------------------------------------------------------------------------------------------------------------------------------------------------------------------------|----------------------|
| Main Results             | 16       | (a) Give unadjusted estimates and, if applicable, confounder-adjusted estimates and their precision (eg, 95% confidence interval). Make clear which confounders were adjusted for and why they were included |                      |
|                          |          | (b) Report category boundaries when continuous variables were categorized                                                                                                                                    |                      |
|                          |          | (c) If relevant, consider translating estimates of relative risk into absolute risk for a meaningful time period                                                                                             |                      |
| Other Analyses           | 17       | Report other analyses done—eg analyses of subgroups and interactions, and sensitivity analyses                                                                                                               |                      |
| <b>Discussion</b>        |          |                                                                                                                                                                                                              |                      |
| Key Results              | 18       | Summarise key results with reference to study objectives                                                                                                                                                     |                      |
| Limitations              | 19       | Discuss limitations of the study, taking into account sources of potential bias or imprecision. Discuss both direction and magnitude of any potential bias                                                   |                      |
| Interpretation           | 20       | Give a cautious overall interpretation of results considering objectives, limitations, multiplicity of analyses, results from similar studies, and other relevant evidence                                   |                      |
| Generalisability         | 21       | Discuss the generalisability (external validity) of the study results                                                                                                                                        |                      |
| <b>Other Information</b> |          |                                                                                                                                                                                                              |                      |
| Funding                  | 22       | Give the source of funding and the role of the funders for the present study and, if applicable, for the original study on which the present article is based                                                |                      |

\*Give information separately for cases and controls in case-control studies and, if applicable, for exposed and unexposed groups in cohort and cross-sectional studies.

**Once you have completed this checklist, please save a copy and upload it as part of your submission. DO NOT include this checklist as part of the main manuscript document. It must be uploaded as a separate file.**
